# Supplementary material for: Experiences of patients who had a stroke and rehabilitation professionals with upper limb rehabilitation robots: a qualitative systematic review protocol
Source: PubMed Central journal article supplement — BMJ Open. 2022 Sep 19;12(9):e065177. doi: 10.1136/bmjopen-2022-065177 (PMC9486398; doi:10.1136/bmjopen-2022-065177), 2022-09-19
Supplement: bmjopen-2022-065177.draft_revisions.pdf [file bmjopen-2022-065177.draft_revisions.pdf]

# BMJ Open

BMJ Open is committed to open peer review. As part of this commitment we make the peer review history of every article we publish publicly available.

When an article is published we post the peer reviewers' comments and the authors' responses online. We also post the versions of the paper that were used during peer review. These are the versions that the peer review comments apply to.

The versions of the paper that follow are the versions that were submitted during the peer review process. They are not the versions of record or the final published versions. They should not be cited or distributed as the published version of this manuscript.

BMJ Open is an open access journal and the full, final, typeset and author-corrected version of record of the manuscript is available on our site with no access controls, subscription charges or pay-per-view fees (<http://bmjopen.bmj.com>).

If you have any questions on BMJ Open's open peer review process please email [info.bmjopen@bmj.com](mailto:info.bmjopen@bmj.com)

# BMJ Open

## The experiences of stroke patients and rehabilitation professionals with upper limb rehabilitation robots: a qualitative systematic review protocol

|                               |                                                                                                                                                                                                                                                                                                                                                                                                         |
|-------------------------------|---------------------------------------------------------------------------------------------------------------------------------------------------------------------------------------------------------------------------------------------------------------------------------------------------------------------------------------------------------------------------------------------------------|
| Journal:                      | <i>BMJ Open</i>                                                                                                                                                                                                                                                                                                                                                                                         |
| Manuscript ID                 | bmjopen-2022-065177                                                                                                                                                                                                                                                                                                                                                                                     |
| Article Type:                 | Protocol                                                                                                                                                                                                                                                                                                                                                                                                |
| Date Submitted by the Author: | 04-Jun-2022                                                                                                                                                                                                                                                                                                                                                                                             |
| Complete List of Authors:     | Chockalingam, Manigandan; National University of Ireland Galway, Occupational Therapy<br>Vasanthan, Lenny; Christian Medical College Vellore, Physiotherapy, Physical Medicine and Rehabilitation<br>Balasubramanian, Sivakumar ; Christian Medical College Vellore, Bioengineering<br>Sriram, Vimal; University Hospitals Bristol and Weston NHS Foundation Trust, Head of Allied Health Professionals |
| Keywords:                     | Stroke < NEUROLOGY, REHABILITATION MEDICINE, QUALITATIVE RESEARCH                                                                                                                                                                                                                                                                                                                                       |
|                               |                                                                                                                                                                                                                                                                                                                                                                                                         |

SCHOLARONE™  
Manuscripts



1  
2  
3 23 Bagayam

4  
5  
6 24 Vellore – 632002

7  
8  
9 25 India

10  
11  
12 26 Email: [siva82kb@cmcvellore.ac.in](mailto:siva82kb@cmcvellore.ac.in)

13  
14  
15  
16 27 Vimal Sriram

17  
18 28 Head of Allied Health Professionals

19  
20 29 University Hospitals Bristol and Weston NHS Foundation Trust

21  
22  
23 30 Trust HQ

24  
25 31 Marlborough Hill

26  
27  
28 32 Bristol, BS1 3NU

29  
30 33 Email: [vimal.sriram@uhbw.nhs.uk](mailto:vimal.sriram@uhbw.nhs.uk)

31  
32  
33  
34 **Corresponding Author:**

35  
36 35 Lenny Vasanthan

37  
38 36 Reader in Physiotherapy

39  
40 37 Christian Medical College, Vellore

41  
42 38 Ida Scudder Road

43  
44 39 Vellore 632 004

45  
46 40 Tamil Nadu

47  
48 41 India

49  
50 42 Email: [lennyv@cmcvellore.ac.in](mailto:lennyv@cmcvellore.ac.in)

51  
52  
53  
54  
55  
56 43 **Word Count**

57  
58 44 Abstract – 293

1  
2  
3  
4  
5  
6  
7  
8  
9  
10  
11  
12  
13  
14  
15  
16  
17  
18  
19  
20  
21  
22  
23  
24  
25  
26  
27  
28  
29  
30  
31  
32  
33  
34  
35  
36  
37  
38  
39  
40  
41  
42  
43  
44  
45  
46  
47  
48  
49  
50  
51  
52  
53  
54  
55  
56  
57  
58  
59  
60

45 Manuscript – 3248

46 **Acknowledgements**

47 We thank Ms Rachel Rajasekaran, Ms Dolly Mira Priyadarshini, and Ms Jackie Fox for  
48 proofreading our manuscript and for valuable English language editing.

For peer review only

1  
2  
3  
4 49 **The experiences of stroke patients and rehabilitation professionals with**  
5  
6 50 **upper limb rehabilitation robots: a qualitative systematic review protocol**  
7  
8  
9

10 51 **ABSTRACT**  
11  
12

13 52 **Introduction:** Despite their proven effectiveness for stroke rehabilitation, upper limb  
14  
15 53 rehabilitation robots are underutilised by rehabilitation professionals. For robotic upper  
16  
17 54 limb rehabilitation in stroke to be successful, patients' experiences and those of the  
18  
19 55 rehabilitation professionals must be considered. Therefore, this review aims to synthesise  
20  
21 56 the available evidence on experiences of patients after a stroke with rehabilitation robots  
22  
23 57 for upper limb rehabilitation and the experiences of rehabilitation professionals with  
24  
25 58 rehabilitation robots for upper limb stroke rehabilitation.  
26  
27  
28  
29  
30

31  
32 59 **Methods and Analysis:** Database search will include MEDLINE(Ovid), EMBASE(Elsevier),  
33  
34 60 Cochrane CENTRAL, PsycINFO, Scopus, Web of Science, and CINAHL(EBSCOhost). Grey  
35  
36 61 literature, from Open Grey, PsyArXiv, bioRxiv, medRxiv, and Google Scholar, will also be  
37  
38 62 searched. The inclusion criteria will be studies that include adult patients after a stroke  
39  
40 63 using rehabilitation robots for upper limb rehabilitation, either supervised by rehabilitation  
41  
42 64 professional or by patients themselves, at any phase in their rehabilitation. Robotic upper  
43  
44 65 limb rehabilitation provided by students, healthcare assistants, technicians, non-  
45  
46 66 professional caregivers, family caregivers, volunteer caregivers, or other informal caregivers  
47  
48 67 will be excluded. Articles published in English will be considered regardless of date of  
49  
50 68 publication. Studies will be screened and critically appraised for methodological quality by  
51  
52 69 two independent reviewers. A standardised tool from JBI SUMARI for data extraction, the  
53  
54  
55  
56  
57  
58  
59  
60

1  
2  
3 70 meta-aggregation approach for data synthesis, and the ConQual approach for confidence  
4  
5  
6 71 evaluation will be followed.  
7  
8

9 72 **Ethics and Dissemination:** This systematic review is a secondary research project based on  
10  
11 73 previously published research, which does not require ethical approval or informed consent.  
12  
13  
14 74 It is anticipated that this systematic review will highlight the experiences of patients after a  
15  
16 75 stroke and perceived facilitators and barriers for rehabilitation professionals on this topic,  
17  
18 76 which will be disseminated through peer-reviewed publications and national and  
19  
20 77 international conferences.  
21  
22  
23

24  
25 78 **Systematic review registration number:** PROSPERO-CRD42022321402  
26  
27

28  
29 79 **Keywords:** robotics; stroke; rehabilitation; experience; health personnel  
30  
31

32 80 **Abstract word count:** 293  
33  
34  
35  
36  
37  
38  
39  
40  
41  
42  
43  
44  
45  
46  
47  
48  
49  
50  
51  
52  
53  
54  
55  
56  
57  
58  
59  
60

1  
2  
3 81 **ARTICLE SUMMARY**  
4  
5  
6

7 82 **STRENGTHS AND LIMITATIONS OF THIS STUDY**  
8  
9

- 10 83 1. This will be the only qualitative systematic review that specifically focuses on the  
11  
12 experiences of adult patients after a stroke undergoing upper limb rehabilitation  
13 84  
14 with rehabilitation robots at any stage in their rehabilitation.  
15 85  
16  
17  
18 86  
19  
20 87 2. This will be the first systematic review to focus on the experiences of rehabilitation  
21  
22 professionals providing upper limb rehabilitation for stroke patients using all types of  
23 88  
24 rehabilitation robots.  
25 89  
26  
27  
28 90  
29  
30 91 3. This review will include only English-language publications due to limited financial  
31  
32 resources, which will limit the review's comprehensiveness.  
33 92  
34  
35  
36  
37  
38  
39  
40  
41  
42  
43  
44  
45  
46  
47  
48  
49  
50  
51  
52  
53  
54  
55  
56  
57  
58  
59  
60



## 93 INTRODUCTION

94 The use of rehabilitation robots has grown over the past few decades,[1] particularly for  
95 upper limb stroke rehabilitation, and the evidence supporting their use is also  
96 increasing.[2,3] Several rehabilitation robots are available to assess and rehabilitate stroke-  
97 impaired upper limbs, including end-effectors,[4,5] (Figure 1 and Figure 2) exoskeletons,[6]  
98 (Figure 3) and exosuits.[7] (Figure 4) They are comparable and may even be superior to  
99 conventional rehabilitation in achieving various positive outcomes, such as reducing upper  
100 limb motor impairment.[2] In addition, systematic reviews of rehabilitation robots in upper  
101 limb stroke rehabilitation have demonstrated that they provide valid outcome  
102 measurements of clinically meaningful body functions and structures of the ICF domain,  
103 such as muscle viscoelasticity[8] and movement-related kinematic parameters.[9]  
104 Rehabilitation robots are therefore increasingly being incorporated into rehabilitation  
105 programs both as intervention devices and as tools for evaluating clinical outcomes.  
106 Even though rehabilitation robots are effective in stroke rehabilitation,[1-3] few studies or  
107 reviews compare the types of robots used, which may explain the varying results.[10,11]  
108 Mehrholz et al., for example, reported that there is no difference between the types of  
109 robots and the improvements in upper limb functional performance in their meta-analysis  
110 of robot-assisted upper limb training in patients after a stroke.[10] In contrast, based on  
111 their meta-analysis, Mogio et al. determined that exoskeleton robots are significantly  
112 superior to end-effector robots in improving finger and hand motor function in patients  
113 after a stroke.[11] It should be noted that the use of exosuit robots in rehabilitation is a  
114 relatively new innovation in robotics and no comparison studies have been completed to  
115 date.[7,12,13]

1  
2  
3 116 Due to the variety of robots available that provide similar clinical outcomes, selecting an  
4  
5  
6 117 appropriate robotic intervention strategy for patients after a stroke by rehabilitation  
7  
8 118 professionals may be complex and challenging.[10] Thus, the subjective experiences of  
9  
10 119 rehabilitation professionals with robots become crucial in the selection and use of  
11  
12  
13 120 rehabilitation robots in clinical practice. Despite rehabilitation robots being clinically  
14  
15 121 effective, the fact that rehabilitation professionals remain cautious when recommending  
16  
17 122 them in clinical practice makes it even more important to study their experiences with and  
18  
19 123 attitudes towards rehabilitation robots.[14,15] Literature also acknowledges this need,  
20  
21 124 pointing out that rehabilitation professionals' attitudes are as important as the benefits  
22  
23 125 derived from robots, if upper limb rehabilitation robots are to be successfully incorporated  
24  
25 126 into clinical practice and emphasises the need for a systematic approach to the adoption of  
26  
27 127 such robots in rehabilitation.[14,15] Therefore, it is necessary to systematically review,  
28  
29 128 document, and compile rehabilitation professionals' perspectives, experiences, and views  
30  
31 129 on upper limb rehabilitation robots.  
32  
33  
34  
35  
36  
37

38 130 Like rehabilitation professionals, the experiences of patients after a stroke, as the end-users  
39  
40 131 of rehabilitation robots, are also vital. The experiences of patients with rehabilitation robots  
41  
42 132 may differ from those of rehabilitation professionals, and therefore, these experiences  
43  
44 133 should be analysed and reported separately. After a stroke, patients tend to prioritise their  
45  
46 134 personal needs and participation in meaningful activities over that of impairment-focused  
47  
48 135 rehabilitation.[16] It is therefore imperative to conduct a comprehensive review of patient  
49  
50 136 experiences related to the use of rehabilitation robots, which may lead to an increase in the  
51  
52 137 acceptance of such devices, and their sustainable use as well as leading to more user-  
53  
54 138 centred designs. Further, a comprehensive summary of patients' likes, dislikes, and  
55  
56  
57  
58  
59  
60

1  
2  
3 139 preferences for specific upper limb rehabilitation robots is fundamental when outcomes  
4  
5  
6 140 among the types of robots are largely similar.[10]  
7  
8

9 141 The only systematic review to date that aimed to meta-synthesise end-user perceptions of  
10  
11 142 robotics is in motor rehabilitation[17] and provides an early, generic description of the  
12  
13  
14 143 patients', caregivers', and professionals' experiences with rehabilitation robots. In the  
15  
16 144 review by Laparidou et al. an overview of all types of motor rehabilitation using  
17  
18 145 rehabilitation robots for various clinical conditions (shoulder instability/rotator cuff injury,  
19  
20 146 spinal cord injury, stroke, brain injury, cerebral palsy, and unspecified clinical conditions) of  
21  
22  
23 147 all ages (from five to 84 years of age) is provided.[17] This review's inclusion of participants  
24  
25  
26 148 with varied clinical presentations offers valuable insight into their generalised experiences  
27  
28 149 with rehabilitation robots. However, as the review focuses on a broad clinical group, it fails  
29  
30  
31 150 to provide a comprehensive focus and in-depth description of rehabilitation robots' use in  
32  
33  
34 151 adult patients with stroke. Stroke upper limb rehabilitation robots for adults require  
35  
36 152 particular considerations because patients after a stroke have unique needs,[18]  
37  
38 153 abilities,[19] and patterns of functional recovery[20] that are distinct from those of other  
39  
40  
41 154 patients, such as patients with spinal cord injury[21,22] or children with cerebral palsy.[23]  
42  
43 155 Thus, the experiences of patients with rehabilitation robots in stroke rehabilitation must be  
44  
45  
46 156 given due consideration and fill the gap in the literature that so far has predominantly  
47  
48 157 looked at multiple clinical conditions without an in-depth focus on patients with stroke, in  
49  
50  
51 158 order to assist rehabilitation professionals' decision-making about robotics in this clinical  
52  
53 159 area.  
54  
55

56  
57 160 A preliminary search of PROSPERO, MEDLINE, Cochrane Database of Systematic Reviews,  
58  
59 161 and JBI Evidence Synthesis was conducted on 01 March 2022. This search did not identify  
60

1  
2  
3 162 any current or ongoing scoping or systematic reviews that focus on patients after a stroke or  
4  
5  
6 163 their rehabilitation professionals' experience with upper limb rehabilitation robots.  
7  
8 164 Reinforcing the need for a qualitative systematic review to explore and establish the full  
9  
10  
11 165 range of experiences of patients and their rehabilitation professionals with upper limb  
12  
13 166 rehabilitation robots in stroke rehabilitation.  
14  
15

## 167 **METHODS AND ANALYSIS**

### 168 **Objective**

169 This review aims to collect and synthesise available evidence regarding the experiences of  
170 patients after a stroke with rehabilitation robots for upper limb rehabilitation irrespective of  
171 the ongoing involvement of rehabilitation professionals as well as the experiences of  
172 rehabilitation professionals with rehabilitation robots for upper limb stroke rehabilitation.  
173

### 173 **Review questions**

- 174 1. What are the experiences of patients after a stroke when undergoing rehabilitation  
175 for stroke-related upper limb dysfunction using rehabilitation robots?
- 176 2. What are the rehabilitation professionals' experiences, perspectives, opinions, and  
177 perceived facilitators and barriers regarding the use of rehabilitation robots for  
178 upper limb rehabilitation among patients after a stroke?

### 179 **Eligibility criteria**

#### 180 **Participants**

181 This review will consider studies that include adult patients (over the age of 18) after a  
182 stroke using rehabilitation robots for upper limb rehabilitation, either supervised by

1  
2  
3 183 rehabilitation professionals or by patients themselves, as part of self-administered robotic  
4  
5  
6 184 therapy at any phase of their rehabilitation.  
7  
8

9 185 To clarify our inclusion criteria, we have used the following definitions:  
10  
11

12  
13 186 *Stroke* – a sudden loss of neurological function caused by haemorrhage or ischemia in the  
14  
15 187 brain parenchyma caused by a vascular event, with symptoms lasting more than 24 hours,  
16  
17 188 which are not explainable by other causes.  
18  
19

20  
21 189 *Phases of rehabilitation* – time after stroke as classified by the Stroke Roundtable  
22  
23 Consortium;<sup>[24]</sup> namely, the hyperacute phase (< 24 hours), the acute phase (2-7 days), the  
24 190  
25 early subacute phase (8-90 days), late subacute phase (91-180 days) and chronic phase  
26 191  
27 (>180 days).  
28  
29  
30

31  
32 193 *Upper limb rehabilitation* – interventions aimed at enhancing the function of the upper limb  
33  
34 194 after considering the goals of patients after a stroke, which are identified following  
35  
36 195 evaluations of their functional abilities and level of activity.  
37  
38  
39

40  
41 196 *Rehabilitation robots* – robots that have contact with a patient to provide physical  
42  
43 197 interaction driven by an actuation system and controlled by the robot alone or in a robot  
44  
45 198 and patient shared control to perform rehabilitation, assessment, compensation, or  
46  
47 199 alleviation.<sup>[25]</sup> Rehabilitation robots may be fixed, mobile, or wearable devices used during  
48  
49 200 inpatient, outpatient, home-based, or community-based rehabilitation. These rehabilitation  
50  
51 201 robots may include mechanical setups such as end-effectors, exoskeletons, or exosuits.  
52  
53

54  
55  
56 202 *End-effectors* – robots with a single point of connection to a patient's distal segment, with  
57  
58 203 joints that are neither matched to nor aligned with other joints of the patient, where the  
59  
60

1  
2  
3 204 force generated by the robot's distal interface is transmitted to other joints of the patient in  
4  
5 205 accordance with the principles of close-kinematic chains.[26] (Figure 1 and Figure 2)  
6  
7

8  
9 206 *Exoskeletons* – robots with rigid anthropomorphic structures attached to the body at  
10  
11 207 multiple points through straps, cuffs, belts, or other attachments, ensuring the robotic joint  
12  
13 208 axes are aligned with the anatomical joints of the wearer's body.[26] (Figure 3)  
14  
15  
16

17  
18 209 *Exosuits* – robots that use softer materials such as fabric instead of rigid anthropomorphic  
19  
20 210 structures.[26] (Figure 4)  
21  
22

23  
24 211 *Upper limb robotic rehabilitation* – robots assisting or resisting movement in a single joint or  
25  
26 212 controlling the intersegmental coordination of the affected upper limb as well as providing  
27  
28 213 and enhancing repetitive task training and task-specific training to improve range of motion,  
29  
30 214 strength, motor learning, and motor control.[10,26] In addition to assessing, compensating  
31  
32 215 for, or alleviating the effects of stroke-related upper limb impairment.  
33  
34  
35

36  
37 216 Studies that report patients with more than one stroke, patients under 18, or patients with  
38  
39 217 other known causes of upper limb impairment besides stroke will be excluded. Studies  
40  
41 218 reporting patients without upper limb motor dysfunction or having sensory impairments  
42  
43 219 alone or cognitive and perceptual impairments alone will be excluded. Hospital robots,  
44  
45 220 social robots, or care/assistive robots that assist patients after a stroke in their activities of  
46  
47 221 daily living without being connected to their upper limb or robotic interventions other than  
48  
49 222 rehabilitation robots, as previously described, will be excluded. Studies reporting upper limb  
50  
51 223 rehabilitation using rehabilitation robots in body segments other than the affected upper  
52  
53 224 limb will be excluded. Likewise, studies reporting upper limb robotic interventions  
54  
55  
56  
57  
58  
59  
60

1  
2  
3 225 conducted concurrently with other robotic interventions for other body segments,  
4  
5  
6 226 presented as a whole and not sufficiently distinguished from one another, will be excluded.  
7  
8

9 227 This review will include rehabilitation professionals who provide stroke upper limb  
10  
11 228 rehabilitation using rehabilitation robots. The rehabilitation professionals may be experts in  
12  
13  
14 229 upper limb rehabilitation, such as physiatrists, physical therapists, occupational therapists,  
15  
16 230 hand therapists, or rehabilitation nurses. Other professionals such as emergency physicians,  
17  
18  
19 231 geriatricians, neurologists, neurosurgeons, or other physicians involved only in the medical  
20  
21 232 or surgical management of patients with stroke who do not provide active upper limb  
22  
23  
24 233 rehabilitation will be excluded. Similarly, rehabilitation engineers, robotic engineers,  
25  
26 234 biomedical engineers, orthotists, and other specialists who are typically not directly involved  
27  
28  
29 235 in physical rehabilitation or clinical care for stroke patients will also be excluded. Robotic  
30  
31 236 upper limb rehabilitation provided by students, healthcare assistants, or technicians, who  
32  
33  
34 237 may not be competent to practice independently, will be excluded. Likewise, robotic upper  
35  
36 238 limb rehabilitation provided by non-professional caregivers, family caregivers, volunteer  
37  
38  
39 239 caregivers, or other informal caregivers will also be excluded.  
40

41  
42 240 Phenomena of interest  
43  
44

45  
46 241 In this review, studies that describe the experiences of patients after a stroke and/or their  
47  
48 242 rehabilitation professional with upper limb rehabilitation robots will be considered. Patients'  
49  
50  
51 243 experiences during or after the use of upper limb rehabilitation robots for stroke can be  
52  
53 244 positive or negative, describe complications/adverse events or any other experiences.  
54  
55  
56 245 Rehabilitation professionals' experiences may include facilitators and barriers, encounters,  
57  
58  
59  
60

1  
2  
3 246 perspectives, or opinions associated with preparing for or providing upper limb

4  
5  
6 247 rehabilitation in stroke using rehabilitation robots.

7  
8  
9 248 **Context**

10  
11  
12  
13 249 The context will not be restricted in this review. This review will consider studies that

14  
15 250 present patients after a stroke or rehabilitation professionals' experiences of providing

16  
17 251 upper limb rehabilitation using rehabilitation robots in any clinical setting during any phase

18  
19  
20 252 of stroke rehabilitation. These settings may include outpatient, inpatient, community-based,

21  
22 253 or home-based intervention services or other therapeutic settings. This review is not

23  
24  
25 254 restricted to geographical locations, funding mechanisms, healthcare facilities, or services.

26  
27  
28  
29 255 **Types of studies**

30  
31  
32 256 This review will consider studies that focus on qualitative data, including, but not limited to,

33  
34 257 designs such as qualitative descriptive, phenomenology, grounded theory, ethnography, and

35  
36  
37 258 action research. This review will also consider the qualitative results of mixed-method

38  
39  
40 259 studies.

41  
42  
43 260 **Methods**

44  
45  
46  
47 261 The proposed systematic review will be conducted in accordance with the JBI methodology

48  
49 262 for systematic reviews of qualitative evidence.[27] The review protocol is registered in

50  
51  
52 263 PROSPERO (CRD42022321402).



## 264 **Search strategy**

265 The search strategy will aim to locate both published and unpublished studies. A three-step  
266 search strategy will be utilised in this review. First, a pilot initial limited search of MEDLINE  
267 (Ovid) and CINAHL (EBSCOhost) was undertaken to identify articles on the topic. The text  
268 words contained in the titles and abstracts of relevant articles and the index terms used to  
269 describe the articles were used to develop a full search strategy for MEDLINE (Ovid) (see  
270 Appendix 1). The search strategy, including all identified keywords and index terms, will be  
271 adapted for each included database and/or information source. The reference lists of all  
272 included sources of evidence will be screened for additional studies.

273 Regardless of the publication date, articles published in English will be included to capture  
274 all relevant literature comprehensively. In view of the limited resources available to  
275 reviewers to translate literature from other languages, languages other than English will be  
276 excluded in this review. The databases will include MEDLINE(Ovid), EMBASE(Elsevier),  
277 Cochrane CENTRAL, PsycINFO, Scopus, Web of Science, and CINAHL(EBSCOhost). Grey  
278 literature will also be searched through Open Grey, PsyArXiv, bioRxiv, medRxiv, and Google  
279 Scholar.

## 280 **Study selection**

281 After the search, the citations will be collated and uploaded into EndNote X20 (Clarivate  
282 Analytics, PA, USA), and duplicates will be removed. After piloting the eligibility criteria on a  
283 sample of citations (between six and eight articles) to ensure consistency in application,[28]  
284 two independent reviewers (MC and LV) will screen all titles and abstracts to determine if  
285 they meet the review's inclusion criteria and any disagreements will be resolved by mutual

1  
2  
3 286 agreement in discussion with the third reviewer (VS). Potentially relevant studies will be  
4  
5  
6 287 retrieved in full, and their citation details imported into the JBI System for the Unified  
7  
8 288 Management, Assessment and Review of Information (JBI SUMARI) (JBI, Adelaide,  
9  
10 289 Australia).[29] The full text of selected citations will be assessed in detail against the  
11  
12  
13 290 inclusion criteria by two independent reviewers (MC and LV), and any disagreements will be  
14  
15 291 resolved in discussion with VS. The reasons for the exclusion of full-text papers that do not  
16  
17 292 meet the inclusion criteria will be recorded and reported. The results of the search and the  
18  
19 293 study inclusion process will be reported in full in the final systematic review and presented  
20  
21 294 using a Preferred Reporting Items for Systematic Reviews and Meta-analyses (PRISMA) flow  
22  
23 295 diagram.[30]

### 296 **Assessment of methodological quality**

31  
32 297 Eligible studies will be critically appraised by two independent reviewers for methodological  
33  
34 298 quality using the standard JBI Critical Appraisal Checklist for Qualitative Research.[31] Any  
35  
36 299 disagreements that arise between the reviewers will be resolved through discussion with  
37  
38 300 the third reviewer. The results of the critical appraisal will be reported in narrative form and  
39  
40 301 tables. Regardless of the results of their methodological quality, all studies will be included  
41  
42 302 in the data extraction and synthesis process to ensure that all experiences are captured  
43  
44 303 comprehensively, and no evidence is missed. All major quality issues of the included studies  
45  
46 304 will be presented and discussed in the final review report.

### 53 305 **Data extraction**

54  
55  
56 306 Data will be extracted from studies included in the review by two independent reviewers  
57  
58 307 using the standardised JBI data extraction tool in JBI SUMARI.[29] The data extracted will  
59  
60

1  
2  
3 308 include specific details about the population, context, culture, geographical location, study  
4  
5 309 methods, and the phenomena of interest relevant to the review objectives, namely  
6  
7  
8 310 experiences of using upper limb rehabilitation robots by patients after a stroke and  
9  
10 311 rehabilitation professionals' experiences of providing stroke upper limb rehabilitation using  
11  
12 312 robots. The findings, and their illustrations, will be extracted verbatim and assigned a level  
13  
14 313 of credibility. Any disagreements that arise between the reviewers will be resolved through  
15  
16 314 discussion with the third reviewer. If necessary, missing or additional data will be requested  
17  
18 315 from the authors. Even after obtaining additional information from the authors, all missing  
19  
20 316 or unclear information that continues to exist will be treated in the review report as missing  
21  
22 317 data.  
23  
24  
25  
26  
27  
28

### 29 318 **Data synthesis**

30  
31  
32 319 Qualitative research findings where possible, will be pooled using JBI SUMARI with the  
33  
34 320 meta-aggregation approach.[32] This will involve the aggregation or synthesis of findings to  
35  
36 321 generate a set of statements representing that aggregation by assembling the findings and  
37  
38 322 categorising these findings based on similarity in meaning. These categories will then be  
39  
40 323 subjected to a synthesis to produce a single comprehensive set of synthesised findings that  
41  
42 324 can be used as a basis for evidence-based practice. Where textual pooling is not possible,  
43  
44 325 the findings will be presented in a narrative form.  
45  
46  
47  
48  
49

### 50 326 **Assessing confidence in the findings**

51  
52  
53  
54 327 The final synthesised findings will be graded according to the ConQual approach for  
55  
56 328 establishing confidence in the output of qualitative research synthesis and presented in a  
57  
58 329 Summary of Findings.[33] The Summary of Findings includes the major elements of the  
59  
60

1  
2  
3 330 review and details how the ConQual score is developed. The title, population, phenomena  
4  
5  
6 331 of interest, and context for the specific review will be included in the summary of findings.  
7  
8 332 Each synthesised finding from the review will then be presented, along with the type of  
9  
10 333 research informing it, the score for dependability and credibility, and the overall ConQual  
11  
12  
13 334 score.

### 16 335 **Patient and public involvement**

18  
19  
20 336 Patients and members of the public were not involved in the planning of this protocol.  
21  
22

### 23 337 **DISCUSSION**

24  
25  
26 338 The main aim of this review is to describe the experiences of patients after a stroke and  
27  
28 339 rehabilitation professionals' experiences with upper limb rehabilitation robots. The results  
29  
30 340 from this review are expected to inform better understanding of the use of upper limb  
31  
32 341 rehabilitation robots, perceptions, opinions, facilitators, and barriers to their use. This  
33  
34 342 review will highlight current research and available evidence in this important and emerging  
35  
36 343 topic area in upper limb rehabilitation after a stroke. The findings from this review will be  
37  
38 344 published and disseminated in journals, conferences and social media, and it is anticipated  
39  
40 345 that the findings from this review will be useful for patients after a stroke, rehabilitation  
41  
42 346 professionals, commissioners of health and care services and developers of rehabilitation  
43  
44 347 robots to inform better provision and ongoing care for patients after a stroke.  
45  
46  
47  
48  
49  
50

51 348

52  
53  
54  
55 349

56  
57  
58  
59 350  
60

1  
2  
3 351 **FIGURE LEGENDS:**  
4  
5

6  
7 352 **Figure 1** illustrates an example of upper limb training using an end-effector robot, H-man.  
8

9 353 \*Note: The person shown in the picture is not a patient and was taken with the participant's  
10  
11 354 knowledge and permission. Picture courtesy of Articares.  
12  
13

14  
15 355 **Figure 2** illustrates an example of upper limb training using an end-effector robot,  
16  
17 MO.TO.RE. \*Note: The person shown in the picture is not a patient and was taken with the  
18 356 participant's knowledge and permission. Picture courtesy of Humanware S.r.l.  
19  
20 357  
21  
22

23  
24 358 **Figure 3** illustrates an example of upper limb training using an exoskeleton robot,  
25  
26 359 ArmeoPower. \*Note: The person shown in the picture is not a patient and was taken with  
27  
28 360 the participant's knowledge and permission. Picture courtesy of Hocoma.  
29  
30

31  
32 361 **Figure 4** illustrates an example of an upper limb exosuit robot described by Hoang et al.  
33  
34 362 being worn by a volunteer. \*Note: The person shown in the picture is not a patient and was  
35  
36 363 taken with the participant's knowledge and permission. Picture courtesy of Dr Thanh Nho  
37  
38 364 Do.  
39  
40  
41

42  
43 365 **ABBREVIATIONS:**  
44  
45

46  
47 366 CINAHL: Cumulative Index of Nursing and Allied Health Literature  
48

49 367 PRISMA: Preferred Reporting Items for Systematic Reviews and Meta-Analyses  
50

51 368 PROSPERO: International Prospective Register of Systematic Reviews  
52  
53

54 369 JBI SUMARI: JBI System for the Unified Management, Assessment and Review of  
55  
56 370 Information  
57  
58  
59  
60

1  
2  
3 371 **AUTHOR CONTRIBUTIONS:**  
4  
5

6  
7 372 MC was responsible for the conceptualisation and design of the study with critical inputs  
8  
9 373 from LV, VS, and SB. MC developed the search strategy and conducted the search with  
10  
11 374 critical input from LV, VS, and SB. The protocol was drafted by MC with important  
12  
13  
14 375 intellectual input and revisions from LV, VS, and SB. All authors have read and given  
15  
16 376 approval for this version and agree to be accountable for all aspects of the work. MC is the  
17  
18  
19 377 guarantor of the review.  
20  
21

22  
23 378 **FUNDING STATEMENT:**  
24  
25

26 379 This research received no specific grant from any funding agency in the public, commercial  
27  
28 380 or not-for-profit sectors.  
29  
30

31  
32 381 **CONFLICT OF INTERESTS STATEMENT:**  
33  
34

35  
36 382 The authors declare that there are no competing interests or conflicting interests.  
37  
38

39 383 **DATA STATEMENT:**  
40  
41

42  
43 384 There are currently no data associated with this protocol. However, this protocol is  
44  
45 385 published in PROSPERO. Details of this citation are as follows  
46  
47

48  
49 386 Manigandan Chockalingam, Lenny Vasanthan T, Sivakumar Balasubramanian, Vimal Sriram.  
50

51 387 Stroke patients and their healthcare providers' experiences of upper limb rehabilitation  
52  
53 388 robotics: a qualitative systematic review protocol. PROSPERO 2022 CRD42022321402  
54

55  
56 389 Available  
57

58  
59 390 from: [https://www.crd.york.ac.uk/prospéro/display\\_record.php?ID=CRD42022321402](https://www.crd.york.ac.uk/prospéro/display_record.php?ID=CRD42022321402)  
60

## 391 REFERENCES

- 392 1. Xue X, Yang X, Deng Z, *et al.* Global Trends and Hotspots in Research on  
393 Rehabilitation Robots: A Bibliometric Analysis From 2010 to 2020. *Front Public*  
394 *Health* 2022;9:806723. doi:10.3389/fpubh.2021.806723  
395 pmid:http://www.ncbi.nlm.nih.gov/pubmed/35087788
- 396 2. Wu J, Cheng H, Zhang J, *et al.* Robot-Assisted Therapy for Upper Extremity Motor  
397 Impairment After Stroke: A Systematic Review and Meta-Analysis. *Phys Ther*  
398 2021;101(4):pzab010. doi:10.1093/ptj/pzab010  
399 pmid:http://www.ncbi.nlm.nih.gov/pubmed/33454787
- 400 3. Doumas I, Everard G, Dehem S, *et al.* Serious games for upper limb rehabilitation  
401 after stroke: a meta-analysis. *J Neuroeng Rehabil* 2021;18(1):100.  
402 doi:10.1186/s12984-021-00889-1  
403 pmid:http://www.ncbi.nlm.nih.gov/pubmed/34130713
- 404 4. Gandolfi M, Valè N, Dimitrova EK, *et al.* Effectiveness of Robot-Assisted Upper Limb  
405 Training on Spasticity, Function and Muscle Activity in Chronic Stroke Patients  
406 Treated With Botulinum Toxin: A Randomized Single-Blinded Controlled Trial. *Front*  
407 *Neurol* 2019;10:41. doi:10.3389/fneur.2019.00041  
408 pmid:http://www.ncbi.nlm.nih.gov/pubmed/30766508
- 409 5. Budhota A, Chua KSG, Hussain A, *et al.* Robotic Assisted Upper Limb Training Post  
410 Stroke: A Randomized Control Trial Using Combinatory Approach Toward Reducing

- 1  
2  
3 411 Workforce Demands. *Front Neurol* 2021;12:622014. doi:10.3389/fneur.2021.622014  
4  
5  
6 412 pmid:http://www.ncbi.nlm.nih.gov/pubmed/34149587  
7  
8  
9 413 6. Calabrò RS, Naro A, Russo M, *et al.* Is two better than one? Muscle vibration plus  
10  
11 414 robotic rehabilitation to improve upper limb spasticity and function: A pilot  
12  
13  
14 415 randomized controlled trial. *PLoS One* 2017;12(10):e0185936.  
15  
16 416 doi:10.1371/journal.pone.0185936  
17  
18  
19 417 pmid:http://www.ncbi.nlm.nih.gov/pubmed/28973024  
20  
21  
22 418 7. Hoang TT, Sy L, Bussu M, *et al.* A Wearable Soft Fabric Sleeve for Upper Limb  
23  
24  
25 419 Augmentation. *Sensors (Basel)*. 2021;21(22):7638. doi:10.3390/s21227638  
26  
27  
28 420 pmid:http://www.ncbi.nlm.nih.gov/pubmed/34833719  
29  
30  
31 421 8. Garcia-Bernal MI, Heredia-Rizo AM, Gonzalez-Garcia P, *et al.* Validity and reliability of  
32  
33 422 myotonometry for assessing muscle viscoelastic properties in patients with stroke: a  
34  
35  
36 423 systematic review and meta-analysis. *Sci Rep* 2021;11(1):5062. doi:10.1038/s41598-  
37  
38 424 021-84656-1 pmid:http://www.ncbi.nlm.nih.gov/pubmed/33658623  
39  
40  
41 425 9. Tran VD, Dario P, Mazzoleni S. Kinematic measures for upper limb robot-assisted  
42  
43  
44 426 therapy following stroke and correlations with clinical outcome measures: A review.  
45  
46  
47 427 *Med Eng Phys* 2018;53:13-31. doi:10.1016/j.medengphy.2017.12.005 Epub 2018 Feb  
48  
49 428 1. pmid:http://www.ncbi.nlm.nih.gov/pubmed/29361407  
50  
51  
52 429 10. Mehrholz J, Pollock A, Pohl M, *et al.* Systematic review with network meta-analysis  
53  
54  
55 430 of randomised controlled trials of robotic-assisted arm training for improving  
56  
57 431 activities of daily living and upper limb function after stroke. *J Neuroeng Rehabil*



- 1  
2  
3 432 2020;17(1):83. doi:10.1186/s12984-020-00715-0  
4  
5  
6 433 pmid:http://www.ncbi.nlm.nih.gov/pubmed/32605587  
7  
8  
9 434 11. Moggio L, de Sire A, Marotta N, *et al.* Exoskeleton versus end-effector robot-assisted  
10  
11 435 therapy for finger-hand motor recovery in stroke survivors: systematic review and  
12  
13 436 meta-analysis. *Top Stroke Rehabil* 2021;1-12. doi:10.1080/10749357.2021.1967657  
14  
15  
16 437 Epub ahead of print. pmid:http://www.ncbi.nlm.nih.gov/pubmed/34420498  
17  
18  
19  
20 438 12. Abe T, Koizumi S, Nabae H, *et al.* Fabrication of "18 Weave" Muscles and Their  
21  
22 439 Application to Soft Power Support Suit for Upper Limbs Using Thin McKibben Muscle.  
23  
24 440 *IEEE Robotics and Automation Letters* 2019;4(3):2532-8.  
25  
26 441 doi:10.1109/LRA.2019.2907433  
27  
28  
29  
30 442 13. Xiloyannis M, Alicea R, Georgarakis AM, *et al.* Soft Robotic Suits: State of the Art,  
31  
32 443 Core Technologies, and Open Challenges. *IEEE Transactions on Robotics* 2021;1-20.  
33  
34 444 doi:10.1109/TRO.2021.3084466  
35  
36  
37 445 14. Lo K, Stephenson M, Lockwood C. Adoption of robotic stroke rehabilitation into  
38  
39 446 clinical settings: a qualitative descriptive analysis. *JBI Evid Implement*  
40  
41 447 2020;18(4):376-390. doi:10.1097/XEB.0000000000000231  
42  
43  
44 448 pmid:http://www.ncbi.nlm.nih.gov/pubmed/33570321  
45  
46  
47  
48 449 15. Jayasree-Krishnan V, Ghosh S, Palumbo A, *et al.* Developing a Framework for  
49  
50 450 Designing and Deploying Technology-Assisted Rehabilitation After Stroke: A  
51  
52 451 Qualitative Study. *Am J Phys Med Rehabil* 2021;100(8):774-779.  
53  
54 452 doi:10.1097/PHM.0000000000001634  
55  
56  
57 453 pmid:http://www.ncbi.nlm.nih.gov/pubmed/33141773  
58  
59  
60

- 1  
2  
3 454 16. Pereira CM, Greenwood N, Jones F. From recovery to regaining control of life - the  
4  
5 perspectives of people with stroke, their carers and health professionals. *Disabil*  
6 455  
7  
8 456 *Rehabil* 2021;43(20):2897-2908. doi:10.1080/09638288.2020.1722263 Epub 2020  
9  
10 Feb 8. pmid:<http://www.ncbi.nlm.nih.gov/pubmed/32036730>  
11 457  
12  
13  
14 458 17. Lapidou D, Curtis F, Akanuwa J, *et al.* Patient, carer, and staff perceptions of  
15  
16 robotics in motor rehabilitation: a systematic review and qualitative meta-synthesis.  
17 459  
18  
19 460 *J Neuroeng Rehabil* 2021;18(1):181. doi:10.1186/s12984-021-00976-3  
20  
21  
22 461 pmid:<http://www.ncbi.nlm.nih.gov/pubmed/34953497>  
23  
24  
25 462 18. Guo Y, Zhang Z, Lin B, *et al.* The Unmet Needs of Community-Dwelling Stroke  
26  
27 Survivors: A Systematic Review of Qualitative Studies. *Int J Environ Res Public Health*  
28 463  
29  
30 464 2021;18(4):2140. doi:10.3390/ijerph18042140  
31  
32  
33 465 pmid:<http://www.ncbi.nlm.nih.gov/pubmed/33671734>  
34  
35  
36 466 19. Hatem SM, Saussez G, Della Faille M, *et al.* Rehabilitation of Motor Function after  
37  
38 Stroke: A Multiple Systematic Review Focused on Techniques to Stimulate Upper  
39 467  
40  
41 468 Extremity Recovery. *Front Hum Neurosci* 2016;10:442.  
42  
43 469 doi:10.3389/fnhum.2016.00442  
44  
45  
46 470 pmid:<http://www.ncbi.nlm.nih.gov/pubmed/27679565>  
47  
48  
49 471 20. Borschmann KN, Hayward KS. Recovery of upper limb function is greatest early after  
50  
51 stroke but does continue to improve during the chronic phase: a two-year,  
52 472  
53  
54 473 observational study. *Physiotherapy* 2020;107:216-223.  
55  
56 474 doi:10.1016/j.physio.2019.10.001 Epub 2019 Oct 17.  
57  
58  
59 475 pmid:<http://www.ncbi.nlm.nih.gov/pubmed/32026823>  
60

- 1  
2  
3 476 21. Gaspar R, Padula N, Freitas TB, *et al.* Physical Exercise for Individuals With Spinal  
4  
5  
6 477 Cord Injury: Systematic Review Based on the International Classification of  
7  
8 478 Functioning, Disability, and Health. *J Sport Rehabil* 2019;28(5):505-516.  
9  
10 479 doi:10.1123/jsr.2017-0185. Epub 2019 Feb 19  
11  
12  
13 480 pmid:http://www.ncbi.nlm.nih.gov/pubmed/30300056  
14  
15  
16 481 22. Mekki M, Delgado AD, Fry A, *et al.* Robotic Rehabilitation and Spinal Cord Injury: a  
17  
18 482 Narrative Review. *Neurotherapeutics* 2018;15(3):604-617. doi:10.1007/s13311-018-  
19  
20 0642-3 pmid:http://www.ncbi.nlm.nih.gov/pubmed/29987763  
21  
22 483  
23  
24 484 23. Jackman M, Lannin N, Galea C, *et al.* What is the threshold dose of upper limb  
25  
26 485 training for children with cerebral palsy to improve function? A systematic review.  
27  
28 486 *Aust Occup Ther J* 2020;67(3):269-280. doi:10.1111/1440-1630.12666 Epub 2020 Apr  
29  
30 487 27. pmid:http://www.ncbi.nlm.nih.gov/pubmed/32342517  
31  
32  
33 488 24. Bernhardt J, Hayward KS, Kwakkel G, *et al.* Agreed Definitions and a Shared Vision for  
34  
35 489 New Standards in Stroke Recovery Research: The Stroke Recovery and Rehabilitation  
36  
37 490 Roundtable Taskforce. *Neurorehabil Neural Repair* 2017 Sep;31(9):793-799  
38  
39 491 doi:10.1177/1545968317732668  
40  
41 492 pmid:http://www.ncbi.nlm.nih.gov/pubmed/28934920  
42  
43  
44 493 25. International Organization for Standardization (2019b). Medical electrical equipment  
45  
46 494 — Part 2-78: particular requirements for basic safety and essential performance of  
47  
48 495 medical robots for rehabilitation, assessment, compensation or alleviation. IEC  
49  
50 496 80601-2-78:2019. Available at: <https://www.iso.org/standard/68474.html>.  
51  
52  
53  
54  
55  
56  
57  
58  
59  
60

- 1  
2  
3 497 26. Bessler J, Prange-Lasonder GB, Schaake L, *et al.* Safety Assessment of Rehabilitation  
4  
5  
6 498 Robots: A Review Identifying Safety Skills and Current Knowledge Gaps. *Front Robot*  
7  
8 499 *AI* 2021;8:602878. doi:10.3389/frobt.2021.602878  
9  
10  
11 500 pmid:http://www.ncbi.nlm.nih.gov/pubmed/33937345  
12  
13  
14 501 27. Lockwood C, Porrit K, Munn Z, *et al.* Chapter 2: Systematic reviews of qualitative  
15  
16 502 evidence. Joanna Briggs Institute, Joanna Briggs Institute Reviewer's Manual  
17  
18 [Internet]. Adelaide: 2017.  
19 503  
20  
21 504 28. Lefebvre C, Glanville J, Briscoe S, *et al.* Chapter 4: Searching for and selecting studies.  
22  
23  
24 505 Cochrane Handbook for Systematic Reviews of Interventions version 6.3 [Internet].  
25  
26 506 Cochrane: 2022.  
27  
28  
29 507 29. Munn Z, Aromataris E, Tufanaru C, *et al.* The development of software to support  
30  
31 508 multiple systematic review types: the Joanna Briggs Institute System for the Unified  
32  
33 509 Management, Assessment and Review of Information (JBI SUMARI). *Int J Evid Based*  
34  
35 *Healthc* 2019;17(1):36-43. doi:10.1097/XEB.0000000000000152  
36 510  
37  
38 511 pmid:http://www.ncbi.nlm.nih.gov/pubmed/30239357  
39  
40  
41  
42 512 30. Page MJ, McKenzie JE, Bossuyt PM, *et al.* The PRISMA 2020 statement: An updated  
43  
44 513 guideline for reporting systematic reviews. *J Clin Epidemiol* 2021;134:178-189.  
45  
46  
47 514 pmid:http://www.ncbi.nlm.nih.gov/pubmed/33789819  
48  
49  
50 515 31. Joanna Briggs Institute. Checklist for Qualitative Research [Internet]. Adelaide:  
51  
52 Joanna Briggs Institute; 2017 [cited 2021 Nov 26]. Available from:  
53 516  
54  
55 517 [https://joannabriggs.org/sites/default/files/2019-05/JBI\\_Critical\\_Appraisal-](https://joannabriggs.org/sites/default/files/2019-05/JBI_Critical_Appraisal-)  
56  
57 518 [Checklist\\_for\\_Qualitative\\_Research2017\\_0.pdf](https://joannabriggs.org/sites/default/files/2019-05/JBI_Critical_Appraisal-Checklist_for_Qualitative_Research2017_0.pdf)  
58  
59  
60

- 1  
2  
3 519 32. Lockwood C, Munn Z, Porritt K. Qualitative research synthesis: methodological  
4  
5 520 guidance for systematic reviewers utilising meta-aggregation. *Int J Evid Based*  
6  
7  
8 521 *Healthc* 2015;13(3):179-87 pmid:<http://www.ncbi.nlm.nih.gov/pubmed/26262565>  
9  
10  
11 522 33. Munn Z, Porritt K, Lockwood C, *et al.* Establishing confidence in the output of  
12  
13  
14 523 qualitative research synthesis: the ConQual approach. *BMC Med Res Methodol*  
15  
16  
17 524 2014;14:108. pmid:<http://www.ncbi.nlm.nih.gov/pubmed/25927294>  
18  
19  
20  
21  
22  
23  
24  
25  
26  
27  
28  
29  
30  
31  
32  
33  
34  
35  
36  
37  
38  
39  
40  
41  
42  
43  
44  
45  
46  
47  
48  
49  
50  
51  
52  
53  
54  
55  
56  
57  
58  
59  
60

For peer review only

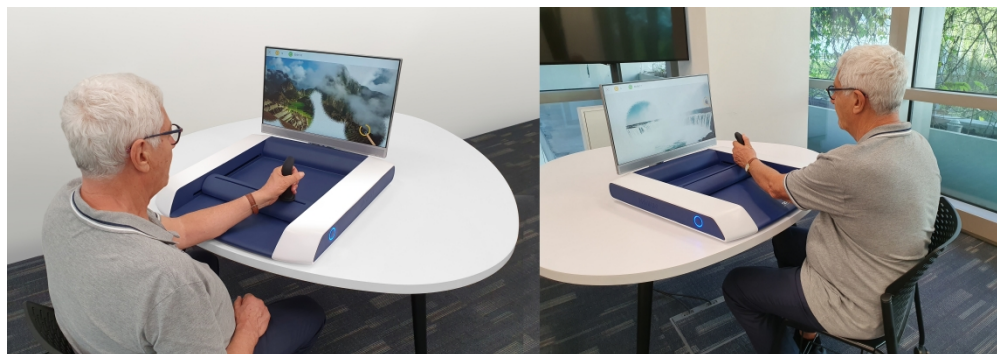

Figure 1 illustrates an example of upper limb training using an end-effector robot, H-man. \*Note: The person shown in the picture is not a patient and was taken with the participant's knowledge and permission. Picture courtesy of Articares.

724x254mm (300 x 300 DPI)

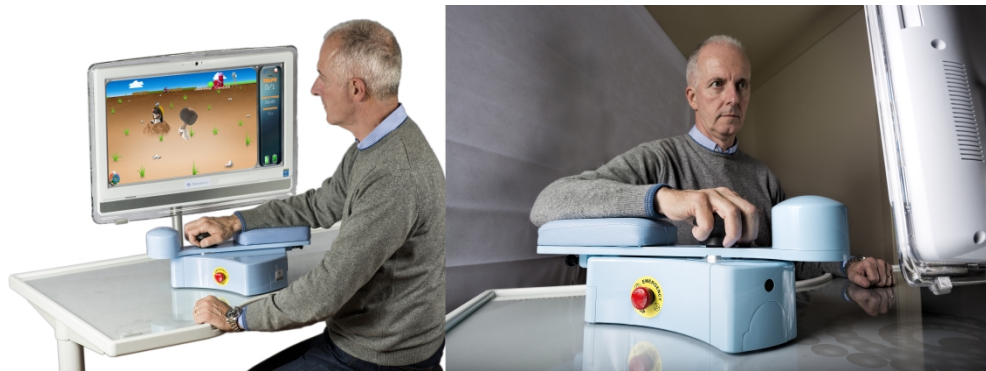

Figure 2 illustrates an example of upper limb training using an end-effector robot, MO.TO.RE. \*Note: The person shown in the picture is not a patient and was taken with the participant's knowledge and permission. Picture courtesy of Humanware S.r.l.

721x265mm (300 x 300 DPI)

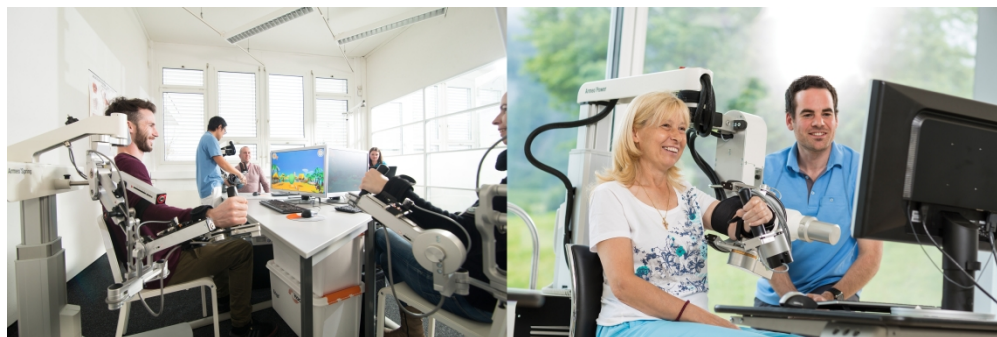

Figure 3 illustrates an example of upper limb training using an exoskeleton robot, ArmeoPower. \*Note: The person shown in the picture is not a patient and was taken with the participant's knowledge and permission. Picture courtesy of Hocoma.

718x239mm (300 x 300 DPI)



1  
2  
3  
4  
5  
6  
7  
8  
9  
10  
11  
12  
13  
14  
15  
16  
17  
18  
19  
20  
21  
22  
23  
24  
25  
26  
27  
28  
29  
30  
31  
32  
33  
34  
35  
36  
37  
38  
39  
40  
41  
42  
43  
44  
45  
46  
47  
48  
49  
50  
51  
52  
53  
54  
55  
56  
57  
58  
59  
60

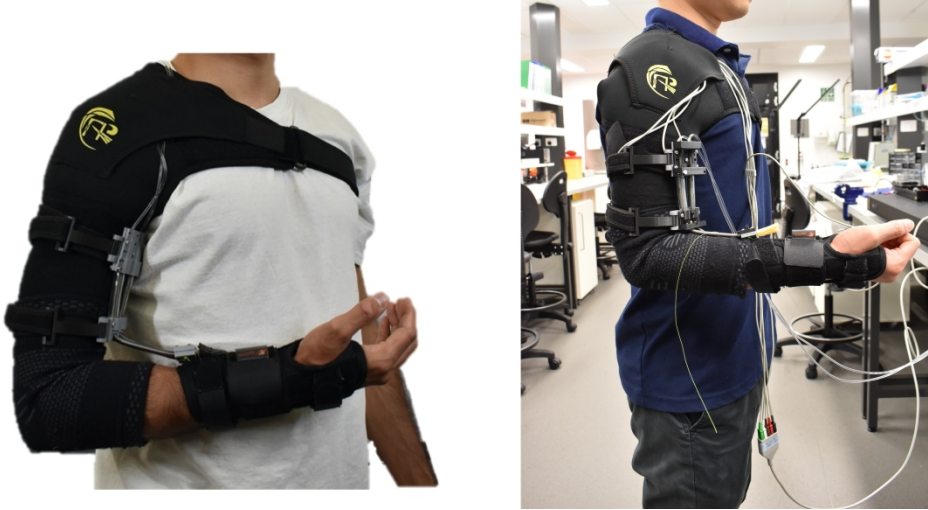

Figure 4 illustrates an example of an upper limb exosuit robot described by Hoang et al. being worn by a volunteer. \*Note: The person shown in the picture is not a patient and was taken with the participant's knowledge and permission. Picture courtesy of Dr Thanh Nho Do.

618x314mm (300 x 300 DPI)

Ovid MEDLINE(R) ALL <1946 to May 20, 2022>

1 exp Psychiatrists/ or exp Health Personnel/ or exp Allied Health Personnel/ or exp Physicians/  
 2 or exp Primary Health Care/ or exp Nurses/ or exp Family Nurse Practitioners/ or exp Nurse  
 3 Practitioners/ or exp Physical Therapists/ or exp Occupational Therapists/ or health personnel.mp. or  
 4 healthcare professional\*.mp. or health-care professional\*.mp. or health care professional\*.mp. or  
 5 allied health professional\*.mp. or doctor\*.mp. or physician\*.mp. or geriatric\*.mp. or rescriber\*.mp.  
 6 or primary healthcare.mp. or paramedic\*.mp. or family nurse.mp. or nurse.mp. or community  
 7 nurse.mp. or physio\*.mp. or physiotherapist.mp. or physio therapist.mp. or physical therapist.mp. or  
 8 hand therapist.mp. or self treatment.mp. or (Caregiver support regime therapy or Carer).mp. or  
 9 Caregivers/ or (health care professional or health care professionals or health care provider or health  
 10 care providers or healthcare provider or healthcare providers or healthcare worker or healthcare  
 11 workers or personnel, health or professional, health care or provider, health care or provider,  
 12 healthcare).mp. (Records Retrieved – 7196481)

2 exp "Attitude of Health Personnel"/ or exp Attitude/ or exp Occupational Stress/ or exp  
 3 "Delivery of Health Care"/ or exp Qualitative Research/ or experience\*.mp. or feel\*.mp. or  
 4 encounter\*.mp. or perception\*.mp. or opinion\*.mp. (Records Retrieved – 3027183)

5 1 and 2 (Records Retrieved – 1094496)

6 exp "Quality of Health Care"/ or exp Patient Satisfaction/ or exp Patient Compliance/ or exp  
 7 Compliance/ or exp "Patient Acceptance of Health Care"/ or exp "Treatment Adherence and  
 8 Compliance"/ or exp Patient Dropouts/ or exp Treatment Refusal/ or exp Patient Participation/ or  
 9 exp Psychological Distress/ or exp Health Behavior/ or exp "Quality of Life"/ or exp Attitude/ or exp  
 10 Qualitative Research/ or patient satisfaction.mp. or patient acceptance.mp. or patient dropout\*.mp.  
 11 or patient participation.mp. or treatment refus\*.mp. or experience\*.mp. or feel\*.mp. or  
 12 encounter\*.mp. or perception\*.mp. or opinion\*.mp. (Records Retrieved – 9171170)

13 3 or 4 (Records Retrieved – 9292409)

14 exp cerebrovascular disorders/ or exp basal ganglia cerebrovascular disease/ or exp brain  
 15 ischemia/ or exp carotid artery diseases/ or exp cerebral small vessel diseases/ or exp intracranial  
 16 arterial diseases/ or exp "intracranial embolism and thrombosis"/ or exp intracranial hemorrhages/  
 17 or stroke/ or exp brain infarction/ or stroke, lacunar/ or vasospasm, intracranial/ or vertebral artery  
 18 dissection/ or brain injuries/ or brain injury, chronic/ or (stroke\* or poststroke or apoplex\* or  
 19 cerebral vasc\* or brain vasc\* or cerebrovasc\* or cva\* or SAH).mp. or ((brain or cerebr\* or cerebell\*  
 20 or vertebrobasil\* or hemispher\* or intracran\* or intracerebral or infratentorial or supratentorial or  
 21 middle cerebral artery or MCA\* or anterior circulation or posterior circulation or basilar artery or  
 22 vertebral artery or space-occupying) adj5 (isch?emi\* or infarct\* or thrombo\* or emboli\* or occlus\*  
 23 or hypoxi\*).mp. or ((brain\* or cerebr\* or cerebell\* or intracerebral or intracran\* or parenchymal or  
 24 intraparenchymal or intraventricular or infratentorial or supratentorial or basal gangli\* or putaminal  
 25 or putamen or posterior fossa or hemispher\* or subarachnoid) adj5 (h?emorrhag\* or h?ematoma\*  
 26 or bleed\*).mp. or hemiplegia/ or exp paresis/ or (hemipleg\* or hemipar\* or paresis or paretic or  
 27 brain injur\*).mp. (Records Retrieved – 805510)

28 exp upper extremity/ or (upper limb\* or upper extremit\* or arm or arms or shoulder or  
 29 shoulders or hand or hands or axilla\* or elbow\* or forearm\* or finger\* or wrist\*).mp. (Records  
 30 Retrieved – 1087124)

1  
2  
3 8 robotics/ or automation/ or orthotic devices/ or "equipment and supplies"/ or self-help  
4 devices/ or therapy, computer-assisted/ or man-machine systems/ or (robot\* or orthos\* or orthotic  
5 or automat\* or computer aided or computer assisted or device\*).mp. or (electromechanical or  
6 electro-mechanical or mechanical or mechanised or mechanized or driven).mp. or exercise  
7 movement techniques/ or exercise/ or exercise therapy/ or muscle stretching techniques/ or motion  
8 therapy, continuous passive/ or ((continuous passive or cpm) adj3 therap\*).mp. or (assist\* adj5  
9 (train\* or aid\* or rehabilitat\* or re-educat\*)).mp. (Records Retrieved – 2054580)

10  
11  
12 9 5 and 6 and 7 and 8 (Records Retrieved – 4059)

13  
14  
15  
16  
17  
18  
19  
20  
21  
22  
23  
24  
25  
26  
27  
28  
29  
30  
31  
32  
33  
34  
35  
36  
37  
38  
39  
40  
41  
42  
43  
44  
45  
46  
47  
48  
49  
50  
51  
52  
53  
54  
55  
56  
57  
58  
59  
60

For peer review only

**S1 Table:** Preferred reporting items for systematic review and meta-analysis protocols (PRISMA-P) 2015 statement. Systematic Reviews 2015 4:1

| Section/topic                     | #  | Checklist item                                                                                                                                                                                  | Information reported                |                                     | Line number(s)       |
|-----------------------------------|----|-------------------------------------------------------------------------------------------------------------------------------------------------------------------------------------------------|-------------------------------------|-------------------------------------|----------------------|
|                                   |    |                                                                                                                                                                                                 | Yes                                 | No                                  |                      |
| <b>ADMINISTRATIVE INFORMATION</b> |    |                                                                                                                                                                                                 |                                     |                                     |                      |
| <b>Title</b>                      |    |                                                                                                                                                                                                 |                                     |                                     |                      |
| Identification                    | 1a | Identify the report as a protocol of a systematic review                                                                                                                                        | <input checked="" type="checkbox"/> | <input type="checkbox"/>            | 4, 50                |
| Update                            | 1b | If the protocol is for an update of a previous systematic review, identify as such                                                                                                              | <input type="checkbox"/>            | <input checked="" type="checkbox"/> | N/A.                 |
| <b>Registration</b>               | 2  | If registered, provide the name of the registry (e.g., PROSPERO) and registration number in the Abstract                                                                                        | <input checked="" type="checkbox"/> | <input type="checkbox"/>            | 78, 262-263, 384-390 |
| <b>Authors</b>                    |    |                                                                                                                                                                                                 |                                     |                                     |                      |
| Contact                           | 3a | Provide name, institutional affiliation, and e-mail address of all protocol authors; provide physical mailing address of corresponding author                                                   | <input checked="" type="checkbox"/> | <input type="checkbox"/>            | 5-42                 |
| Contributions                     | 3b | Describe contributions of protocol authors and identify the guarantor of the review                                                                                                             | <input checked="" type="checkbox"/> | <input type="checkbox"/>            | 371-377              |
| <b>Amendments</b>                 | 4  | If the protocol represents an amendment of a previously completed or published protocol, identify as such and list changes; otherwise, state plan for documenting important protocol amendments | <input type="checkbox"/>            | <input checked="" type="checkbox"/> | N/A                  |
| <b>Support</b>                    |    |                                                                                                                                                                                                 |                                     |                                     |                      |
| Sources                           | 5a | Indicate sources of financial or other support for the review                                                                                                                                   | <input type="checkbox"/>            | <input checked="" type="checkbox"/> | 378-380              |
| Sponsor                           | 5b | Provide name for the review funder and/or sponsor                                                                                                                                               | <input type="checkbox"/>            | <input checked="" type="checkbox"/> | 378-380              |
| Role of sponsor/funder            | 5c | Describe roles of funder(s), sponsor(s), and/or institution(s), if any, in developing the protocol                                                                                              | <input type="checkbox"/>            | <input checked="" type="checkbox"/> | 378-380              |
| <b>INTRODUCTION</b>               |    |                                                                                                                                                                                                 |                                     |                                     |                      |
| <b>Rationale</b>                  | 6  | Describe the rationale for the review in the context of what is already known                                                                                                                   | <input checked="" type="checkbox"/> | <input type="checkbox"/>            | 106-166              |

| Section/topic                      | #   | Checklist item                                                                                                                                                                                                            | Information reported                |                                     | Line number(s)         |
|------------------------------------|-----|---------------------------------------------------------------------------------------------------------------------------------------------------------------------------------------------------------------------------|-------------------------------------|-------------------------------------|------------------------|
|                                    |     |                                                                                                                                                                                                                           | Yes                                 | No                                  |                        |
| <b>Objectives</b>                  | 7   | Provide an explicit statement of the question(s) the review will address with reference to participants, interventions, comparators, and outcomes (PICO)                                                                  | <input checked="" type="checkbox"/> | <input type="checkbox"/>            | 168 -172               |
| <b>METHODS</b>                     |     |                                                                                                                                                                                                                           |                                     |                                     |                        |
| <b>Eligibility criteria</b>        | 8   | Specify the study characteristics (e.g., PICO, study design, setting, time frame) and report characteristics (e.g., years considered, language, publication status) to be used as criteria for eligibility for the review | <input checked="" type="checkbox"/> | <input type="checkbox"/>            | 179- 259               |
| <b>Information sources</b>         | 9   | Describe all intended information sources (e.g., electronic databases, contact with study authors, trial registers, or other grey literature sources) with planned dates of coverage                                      | <input checked="" type="checkbox"/> | <input type="checkbox"/>            | 273-279                |
| <b>Search strategy</b>             | 10  | Present draft of search strategy to be used for at least one electronic database, including planned limits, such that it could be repeated                                                                                | <input checked="" type="checkbox"/> | <input type="checkbox"/>            | 264-279 and Appendix 1 |
| <b>STUDY RECORDS</b>               |     |                                                                                                                                                                                                                           |                                     |                                     |                        |
| Data management                    | 11a | Describe the mechanism(s) that will be used to manage records and data throughout the review                                                                                                                              | <input checked="" type="checkbox"/> | <input type="checkbox"/>            | 280-334                |
| Selection process                  | 11b | State the process that will be used for selecting studies (e.g., two independent reviewers) through each phase of the review (i.e., screening, eligibility, and inclusion in meta-analysis)                               | <input checked="" type="checkbox"/> | <input type="checkbox"/>            | 280-295                |
| Data collection process            | 11c | Describe planned method of extracting data from reports (e.g., piloting forms, done independently, in duplicate), any processes for obtaining and confirming data from investigators                                      | <input checked="" type="checkbox"/> | <input type="checkbox"/>            | 305-317                |
| <b>Data items</b>                  | 12  | List and define all variables for which data will be sought (e.g., PICO items, funding sources), any pre-planned data assumptions and simplifications                                                                     | <input type="checkbox"/>            | <input checked="" type="checkbox"/> | 305-317                |
| <b>Outcomes and prioritization</b> | 13  | List and define all outcomes for which data will be sought, including                                                                                                                                                     | <input type="checkbox"/>            | <input checked="" type="checkbox"/> | N/A                    |

| Section/topic                             | #   | Checklist item                                                                                                                                                                                                                              | Information reported                |                                     | Line number(s) |
|-------------------------------------------|-----|---------------------------------------------------------------------------------------------------------------------------------------------------------------------------------------------------------------------------------------------|-------------------------------------|-------------------------------------|----------------|
|                                           |     |                                                                                                                                                                                                                                             | Yes                                 | No                                  |                |
|                                           |     | prioritization of main and additional outcomes, with rationale                                                                                                                                                                              |                                     |                                     |                |
| <b>Risk of bias in individual studies</b> | 14  | Describe anticipated methods for assessing risk of bias of individual studies, including whether this will be done at the outcome or study level, or both; state how this information will be used in data synthesis                        | <input checked="" type="checkbox"/> | <input type="checkbox"/>            | 296-304        |
| <b>DATA</b>                               |     |                                                                                                                                                                                                                                             |                                     |                                     |                |
| <b>Synthesis</b>                          | 15a | Describe criteria under which study data will be quantitatively synthesized                                                                                                                                                                 | <input type="checkbox"/>            | <input checked="" type="checkbox"/> | N/A            |
|                                           | 15b | If data are appropriate for quantitative synthesis, describe planned summary measures, methods of handling data, and methods of combining data from studies, including any planned exploration of consistency (e.g., $I^2$ , Kendall's tau) | <input type="checkbox"/>            | <input checked="" type="checkbox"/> | N/A            |
|                                           | 15c | Describe any proposed additional analyses (e.g., sensitivity or subgroup analyses, meta-regression)                                                                                                                                         | <input type="checkbox"/>            | <input checked="" type="checkbox"/> | N/A            |
|                                           | 15d | If quantitative synthesis is not appropriate, describe the type of summary planned                                                                                                                                                          | <input checked="" type="checkbox"/> | <input type="checkbox"/>            | 318-325        |
| <b>Meta-bias(es)</b>                      | 16  | Specify any planned assessment of meta-bias(es) (e.g., publication bias across studies, selective reporting within studies)                                                                                                                 | <input type="checkbox"/>            | <input checked="" type="checkbox"/> | N/A            |
| <b>Confidence in cumulative evidence</b>  | 17  | Describe how the strength of the body of evidence will be assessed (e.g., GRADE)                                                                                                                                                            | <input checked="" type="checkbox"/> | <input type="checkbox"/>            | 326-334        |

# BMJ Open

## The experiences of stroke patients and rehabilitation professionals with upper limb rehabilitation robots: a qualitative systematic review protocol

|                                 |                                                                                                                                                                                                                                                                                                                                                                                                         |
|---------------------------------|---------------------------------------------------------------------------------------------------------------------------------------------------------------------------------------------------------------------------------------------------------------------------------------------------------------------------------------------------------------------------------------------------------|
| Journal:                        | <i>BMJ Open</i>                                                                                                                                                                                                                                                                                                                                                                                         |
| Manuscript ID                   | bmjopen-2022-065177.R1                                                                                                                                                                                                                                                                                                                                                                                  |
| Article Type:                   | Protocol                                                                                                                                                                                                                                                                                                                                                                                                |
| Date Submitted by the Author:   | 22-Aug-2022                                                                                                                                                                                                                                                                                                                                                                                             |
| Complete List of Authors:       | Chockalingam, Manigandan; National University of Ireland Galway, Occupational Therapy<br>Vasanthan, Lenny; Christian Medical College Vellore, Physiotherapy, Physical Medicine and Rehabilitation<br>Balasubramanian, Sivakumar ; Christian Medical College Vellore, Bioengineering<br>Sriram, Vimal; University Hospitals Bristol and Weston NHS Foundation Trust, Head of Allied Health Professionals |
| <b>Primary Subject Heading</b>: | Qualitative research                                                                                                                                                                                                                                                                                                                                                                                    |
| Secondary Subject Heading:      | Neurology, Qualitative research, Rehabilitation medicine                                                                                                                                                                                                                                                                                                                                                |
| Keywords:                       | Stroke < NEUROLOGY, REHABILITATION MEDICINE, QUALITATIVE RESEARCH                                                                                                                                                                                                                                                                                                                                       |
|                                 |                                                                                                                                                                                                                                                                                                                                                                                                         |

SCHOLARONE™  
Manuscripts

1  
2  
3  
4  
5  
6  
7  
8  
9  
10  
11  
12  
13  
14  
15  
16  
17  
18  
19  
20  
21  
22  
23  
24  
25  
26  
27  
28  
29  
30  
31  
32  
33  
34  
35  
36  
37  
38  
39  
40  
41  
42  
43  
44  
45  
46  
47  
48  
49  
50  
51  
52  
53  
54  
55  
56  
57  
58  
59  
60  
**TITLE PAGE****1**  
**2 Title of the article:**

3 The experiences of stroke patients and rehabilitation professionals with upper limb  
4 rehabilitation robots: a qualitative systematic review protocol

**5 Authors**

6 Manigandan Chockalingam

7 Lecturer in Occupational Therapy

8 School of Health Sciences

9 R.No. 213 Moyola Building

10 National University of Ireland Galway

11 Galway

12 Ireland

13 Email: [Manigandan.Chockalingam@nuigalway.ie](mailto:Manigandan.Chockalingam@nuigalway.ie); [manigandan93@yahoo.com](mailto:manigandan93@yahoo.com)

14 Lenny Vasanthan

15 Reader in Physiotherapy

16 Christian Medical College, Vellore

17 Vellore – 632004

18 India

19 Email: [lennyv@cmcvellore.ac.in](mailto:lennyv@cmcvellore.ac.in)

20 Sivakumar Balasubramanian

21 Professor and Head of Bioengineering

22 Christian Medical College



1  
2  
3 23 Bagayam  
4  
5  
6 24 Vellore – 632002  
7  
8  
9 25 India  
10  
11  
12 26 Email: [siva82kb@cmcvellore.ac.in](mailto:siva82kb@cmcvellore.ac.in)  
13  
14  
15  
16 27 Vimal Sriram  
17  
18 28 Head of Allied Health Professionals  
19  
20 29 University Hospitals Bristol and Weston NHS Foundation Trust  
21  
22  
23 30 Trust HQ  
24  
25 31 Marlborough Hill  
26  
27  
28 32 Bristol, BS1 3NU  
29  
30 33 Email: [vimal.sriram@uhbw.nhs.uk](mailto:vimal.sriram@uhbw.nhs.uk)  
31  
32  
33  
34 **Corresponding Author:**  
35  
36 35 Lenny Vasanthan  
37  
38 36 Reader in Physiotherapy  
39  
40 37 Christian Medical College, Vellore  
41  
42 38 Ida Scudder Road  
43  
44 39 Vellore 632 004  
45  
46 40 Tamil Nadu  
47  
48 41 India  
49  
50 42 Email: [lennyv@cmcvellore.ac.in](mailto:lennyv@cmcvellore.ac.in)  
51  
52  
53  
54  
55  
56  
57 43 **Word Count**  
58  
59 44 Abstract – 297  
60

1  
2  
3  
4  
5  
6  
7  
8  
9  
10  
11  
12  
13  
14  
15  
16  
17  
18  
19  
20  
21  
22  
23  
24  
25  
26  
27  
28  
29  
30  
31  
32  
33  
34  
35  
36  
37  
38  
39  
40  
41  
42  
43  
44  
45  
46  
47  
48  
49  
50  
51  
52  
53  
54  
55  
56  
57  
58  
59  
60

45 Manuscript – 3664

46 **Acknowledgements**

47 We thank Ms Rachel Rajasekaran, Ms Dolly Mira Priyadarshini, and Ms Jackie Fox for  
48 proofreading our manuscript and for valuable English language editing.

For peer review only

1  
2  
3 49 **The experiences of stroke patients and rehabilitation professionals with**  
4  
5  
6 50 **upper limb rehabilitation robots: a qualitative systematic review protocol**  
7  
8  
9

10 51 **ABSTRACT**  
11  
12

13 52 **Introduction:** Emerging evidence suggests that robotic devices for upper limb rehabilitation  
14  
15 53 after a stroke may improve upper limb function. For robotic upper limb rehabilitation in  
16  
17 54 stroke to be successful, patients' experiences and those of the rehabilitation professionals  
18  
19 55 must be considered. Therefore, this review aims to synthesise the available evidence on  
20  
21 56 experiences of patients after a stroke with rehabilitation robots for upper limb rehabilitation  
22  
23 57 and the experiences of rehabilitation professionals with rehabilitation robots for upper limb  
24  
25 58 stroke rehabilitation.  
26  
27  
28  
29  
30

31  
32 59 **Methods and Analysis:** Database search will include MEDLINE(Ovid), EMBASE(Elsevier),  
33  
34 60 Cochrane CENTRAL, PsycINFO, Scopus, Web of Science, IEEE and CINAHL(EBSCOhost). Grey  
35  
36 61 literature from Open Grey, PsyArXiv, bioRxiv, medRxiv, and Google Scholar, will also be  
37  
38 62 searched. Qualitative studies or results from mixed-method studies that include adult  
39  
40 63 patients after a stroke who use upper limb rehabilitation robots, either supervised by  
41  
42 64 rehabilitation professionals or by patients themselves, at any stage of their rehabilitation  
43  
44 65 and/or stroke professionals who use upper limb rehabilitation robots will be included.  
45  
46 66 Robotic upper limb rehabilitation provided by students, healthcare assistants, technicians,  
47  
48 67 non-professional caregivers, family caregivers, volunteer caregivers, or other informal  
49  
50 68 caregivers will be excluded. Articles published in English will be considered regardless of  
51  
52 69 date of publication. Studies will be screened and critically appraised for methodological  
53  
54 70 quality by two independent reviewers. A standardised tool from JBI SUMARI for data  
55  
56  
57  
58  
59  
60

1  
2  
3 71 extraction, the meta-aggregation approach for data synthesis, and the ConQual approach  
4  
5 72 for confidence evaluation will be followed.  
6  
7  
8

9 73 **Ethics and Dissemination:** As this systematic review is based on previously published  
10  
11 74 research, no informed consent or ethical approval is required. It is anticipated that this  
12  
13 75 systematic review will highlight the experiences of patients after a stroke and perceived  
14  
15 76 facilitators and barriers for rehabilitation professionals on this topic, which will be  
16  
17 77 disseminated through peer-reviewed publications and national and international  
18  
19 78 conferences.  
20  
21  
22  
23

24  
25 79 **Systematic review registration number:** PROSPERO-CRD42022321402  
26  
27

28 80 **Keywords:** robotics; stroke; rehabilitation; experience; health personnel  
29  
30  
31

32 81 **Abstract word count:** 297  
33  
34  
35  
36  
37  
38  
39  
40  
41  
42  
43  
44  
45  
46  
47  
48  
49  
50  
51  
52  
53  
54  
55  
56  
57  
58  
59  
60

1  
2  
3 **82 ARTICLE SUMMARY**  
4  
5  
6

7 **83 STRENGTHS AND LIMITATIONS OF THIS STUDY**  
8  
9

- 10 84 1. This review will include literature from inter-disciplinary databases to maximise  
11  
12  
13 85 diversity of data.  
14  
15 86 2. Inclusion of grey literature in this review will provide comprehensive information of  
16  
17  
18 87 experiences in the use of upper limb rehabilitation robots that are not commercially  
19  
20 88 available.  
21  
22  
23 89 3. Use of ConQual approach will ensure confidence in the synthesised findings of this  
24  
25 90 review.  
26  
27  
28 91 4. This review will include only English-language publications due to limited financial  
29  
30 92 resources, which will limit the reviews comprehensiveness.  
31  
32  
33  
34  
35  
36  
37  
38  
39  
40  
41  
42  
43  
44  
45  
46  
47  
48  
49  
50  
51  
52  
53  
54  
55  
56  
57  
58  
59  
60

## 93 INTRODUCTION

94 The use of rehabilitation robots has grown over the past few decades,[1] particularly for  
95 upper limb stroke rehabilitation, and the evidence supporting their use is also  
96 increasing.[2,3] Several rehabilitation robots are available to assess and augment  
97 rehabilitation of stroke-impaired upper limbs under direct or remote supervision, including  
98 end-effectors,[4,5] (Figure 1 and Figure 2) exoskeletons,[6] (Figure 3) and exosuits.[7]  
99 (Figure 4) The use of rehabilitation robots produces comparable results,[8] and in some  
100 cases, such as when used by individuals with upper extremity hemiplegia, who have limited  
101 chances of spontaneous recovery after stroke, they could produce better results than those  
102 achieved by other routine therapy methods.[2,3] In addition, systematic reviews of  
103 rehabilitation robots in upper limb stroke rehabilitation have demonstrated that they  
104 provide valid outcome measurements of clinically meaningful body functions and structures  
105 of the ICF domain, such as muscle viscoelasticity[9] and movement-related kinematic  
106 parameters.[10] For these reasons, rehabilitation robots are receiving increasing attention  
107 in rehabilitation programs as intervention devices and tools for evaluating clinical outcomes.  
108 Although rehabilitation robots have not been extensively examined for their adoption in  
109 routine care, the increasing number of robots being commercialised over the past decade  
110 and the increased number of robotic literature suggests a slow and steady adoption.[11]  
111 There is some emerging evidence that rehabilitation robots may improve upper limb  
112 function after a stroke.[1-3] Studies have compared different types of robots in concluding  
113 effectiveness of upper limb function,[8,12] which may explain the varying results between  
114 studies that support or negate the effectiveness of upper limb robotic rehabilitation.  
115 Mehrholz et al., for example, reported that there is no difference between the types of

1  
2  
3 116 robots and the improvements in upper limb functional performance in their meta-analysis  
4  
5  
6 117 of robot-assisted upper limb training in patients after a stroke.[8] In contrast, the meta-  
7  
8 118 analysis by Mogio et al. found that exoskeleton robots are significantly superior to end-  
9  
10 119 effector robots in improving finger and hand motor function in patients after a stroke.[12] It  
11  
12  
13 120 should be noted that the use of Exosuits in rehabilitation is a relatively new approach in  
14  
15 121 rehabilitation robotics, and no comparison studies have been completed to date.[7,13,14]  
16  
17  
18  
19 122 Due to the variety of robots available that provide similar clinical outcomes, selecting an  
20  
21 123 appropriate robotic intervention strategy for patients after a stroke by rehabilitation  
22  
23 124 professionals may be complex and challenging.[8] Thus, the subjective experiences of  
24  
25 125 rehabilitation professionals with robots become crucial in the selection and use of  
26  
27 126 rehabilitation robots in clinical practice. Despite rehabilitation robots being clinically  
28  
29 127 effective, the fact that rehabilitation professionals remain cautious when recommending  
30  
31 128 them in clinical practice makes it even more important to study their experiences with and  
32  
33 129 attitudes towards rehabilitation robots.[15,16] The literature also acknowledges this need,  
34  
35 130 pointing out that rehabilitation professionals' attitudes are as important as the benefits  
36  
37 131 derived from robots.[15,16] If upper limb rehabilitation robots are to be successfully  
38  
39 132 incorporated into clinical practice there is a need for a systematic approach to the adoption  
40  
41 133 of such robots in rehabilitation.[15,16] Therefore, it is necessary to systematically review,  
42  
43 134 document, and compile rehabilitation professionals' perspectives, experiences, and views  
44  
45 135 on upper limb rehabilitation robots.  
46  
47  
48  
49  
50  
51  
52  
53  
54 136 Renaud and Van Biljon assert that a person's adoption of technology begins when they  
55  
56 137 become aware of it and ends when they accept and fully utilise it.[17] The perceptions,  
57  
58 138 perspectives, satisfaction and other experiences of an end user play a significant role in  
59  
60

1  
2  
3 139 determining whether that end user will successfully adopt the technology and whether the  
4  
5  
6 140 technology will continue to be used or discontinued.[18] Thus, the experiences of patients  
7  
8 141 who use rehabilitation robots after a stroke are as significant as those of rehabilitation  
9  
10 142 professionals. The experiences of patients with rehabilitation robots may differ from those  
11  
12  
13 143 of rehabilitation professionals, and therefore, these experiences should be analysed and  
14  
15 144 reported separately. After a stroke, patients tend to prioritise their personal needs and  
16  
17  
18 145 participation in meaningful activities over that of impairment-focused rehabilitation.[19] It is  
19  
20 146 therefore imperative to conduct a comprehensive review of patient experiences related to  
21  
22  
23 147 the use of rehabilitation robots, which may lead to an increase in the acceptance and  
24  
25 148 sustained use of these devices by informing improved user-centred designs. Further, a  
26  
27  
28 149 comprehensive summary of patients' likes, dislikes, and preferences for specific upper limb  
29  
30 150 rehabilitation robots is fundamental when outcomes among the types of robots are largely  
31  
32  
33 151 similar.[8]

34  
35  
36 152 The only systematic review to date that aimed to meta-synthesise end-user perceptions of  
37  
38 153 robotics is in motor rehabilitation[20] and provides an early, generic description of the  
39  
40  
41 154 patients', caregivers', and professionals' experiences with rehabilitation robots. In the  
42  
43  
44 155 review by Laparidou et al., an overview of all types of motor rehabilitation using  
45  
46 156 rehabilitation robots for various clinical conditions (shoulder instability/rotator cuff injury,  
47  
48 157 spinal cord injury, stroke, brain injury, cerebral palsy, and unspecified clinical conditions) of  
49  
50  
51 158 all ages (from five to 84 years of age) is provided.[20] This review's inclusion of participants  
52  
53 159 with varied clinical presentations offers valuable insight into their generalised experiences  
54  
55  
56 160 with rehabilitation robots. However, as the review focuses on a broad clinical group, it fails  
57  
58 161 to provide a comprehensive focus and in-depth description of rehabilitation robots' use in  
59  
60



1  
2  
3 162 adult patients with stroke. Stroke upper limb rehabilitation robots for adults require  
4  
5 163 particular considerations due to their unique needs,[21] abilities,[22] and patterns of  
6  
7 164 functional recovery[23] that are distinct from those of other patient populations, such as  
8  
9 165 spinal cord injury[24,25] or children with cerebral palsy.[26] This work addresses the lack of  
10  
11 166 an in-depth focus on patients with stroke to fill the gap in the literature that so far has  
12  
13 167 predominantly looked at multiple clinical conditions.

14  
15  
16  
17  
18  
19 168 A preliminary search of PROSPERO, MEDLINE, Cochrane Database of Systematic Reviews,  
20  
21 169 and JBI Evidence Synthesis was conducted on 01 March 2022. During the search, no scoping  
22  
23 170 or systematic reviews were identified that focused on the experiences of the use of upper  
24  
25 171 limb rehabilitation robots by stroke patients or their rehabilitation professionals, indicating  
26  
27 172 the necessity for a qualitative systematic review to further explore this.

## 31 32 173 **METHODS AND ANALYSIS**

### 33 34 35 174 **Objective**

36  
37  
38 175 This review aims to collect and synthesise available evidence regarding the experiences of  
39  
40 176 patients after a stroke using robots for upper limb rehabilitation irrespective of the ongoing  
41  
42 177 involvement of rehabilitation professionals and the experiences of rehabilitation  
43  
44 178 professionals using robots for upper limb stroke rehabilitation.

### 45 46 47 48 49 179 **Review questions**

- 50  
51  
52  
53 180 1. What are the experiences of patients after a stroke when undergoing rehabilitation  
54  
55 181 for upper limb dysfunction using rehabilitation robots?  
56  
57  
58  
59  
60

- 1  
2  
3 182 2. What are the rehabilitation professionals' experiences, perspectives, opinions, and  
4  
5  
6 183 perceived facilitators and barriers regarding the use of rehabilitation robots for  
7  
8 184 upper limb stroke rehabilitation?  
9

10  
11  
12 185 **Eligibility criteria**

13  
14 186 **Participants**

15  
16  
17  
18 187 This review will consider studies that include adult patients (over the age of 18) after a  
19  
20 188 stroke using rehabilitation robots for upper limb rehabilitation, either supervised by  
21  
22  
23 189 rehabilitation professionals or by patients themselves, as part of self-administered robotic  
24  
25 190 therapy at any phase of their rehabilitation.  
26

27  
28  
29 191 To clarify our inclusion criteria, we have used the following definitions:  
30

31  
32 192 *Stroke* – a sudden loss of neurological function caused by haemorrhage or ischemia in the  
33  
34  
35 193 brain parenchyma caused by a vascular event, with symptoms lasting more than 24 hours,  
36  
37 194 which are not explainable by other causes.  
38

39  
40  
41 195 *Phases of rehabilitation* – time after stroke as classified by the Stroke Roundtable

42  
43 196 Consortium;<sup>[27]</sup> namely, the hyperacute phase (< 24 hours), the acute phase (2-7 days), the  
44  
45  
46 197 early subacute phase (8-90 days), late subacute phase (91-180 days) and chronic phase  
47  
48 198 (>180 days).  
49

50  
51  
52 199 *Upper limb rehabilitation* – interventions aimed at enhancing the function of the upper limb  
53  
54 200 after considering the goals of patients after a stroke, which are identified following  
55  
56  
57 201 evaluations of their functional abilities and level of activity.  
58  
59  
60

1  
2  
3 202 *Rehabilitation robots* – robots that have contact with a patient to provide physical  
4  
5  
6 203 interaction driven by an actuation system and controlled by the robot alone or in a robot  
7  
8 204 and patient shared control to perform rehabilitation, assessment, compensation, or  
9  
10 205 alleviation.[28] Rehabilitation robots may be fixed, mobile, or wearable devices used during  
11  
12 206 inpatient, outpatient, home-based, or community-based rehabilitation. These rehabilitation  
13  
14 207 robots may take the forms of end-effectors, exoskeletons, or exosuits.

15  
16  
17  
18  
19 208 *End-effectors* – robots with a single point of connection to a patient's distal segment, with  
20  
21 209 joints that are neither matched to nor aligned with other joints of the patient, where the  
22  
23 210 force generated by the robot's distal interface is transmitted to other joints of the patient in  
24  
25 211 accordance with the principles of close-kinematic chains.[29] (Figure 1 and Figure 2)

26  
27  
28  
29  
30 212 *Exoskeletons* – robots with rigid anthropomorphic structures attached to the body at  
31  
32 213 multiple points through straps, cuffs, belts, or other attachments, ensuring the robotic joint  
33  
34 214 axes are aligned with the anatomical joints of the wearer's body.[29] (Figure 3)

35  
36  
37  
38 215 *Exosuits* – robots that use softer materials such as fabric instead of rigid anthropomorphic  
39  
40 216 structures.[29] (Figure 4)

41  
42  
43  
44 217 *Upper limb robotic rehabilitation* – robots assisting or resisting movement in a single joint or  
45  
46 218 controlling the intersegmental coordination of the affected upper limb as well as providing  
47  
48 219 and enhancing repetitive task training and task-specific training to improve range of motion,  
49  
50 220 strength, motor learning, and motor control.[8,29] In addition to assessing, compensating  
51  
52 221 for, or alleviating the effects of stroke-related upper limb impairment.

1  
2  
3 222 Studies that report patients with more than one stroke, patients under 18, or patients with  
4  
5 223 other known causes of upper limb impairment besides stroke will be excluded. Studies  
6  
7 224 reporting patients without upper limb motor dysfunction or having sensory impairments  
8  
9 225 alone or cognitive and perceptual impairments alone will be excluded. Hospital robots,  
10  
11 226 social robots, or care/assistive robots that assist patients after a stroke in their activities of  
12  
13 227 daily living without being connected to their upper limb or robotic interventions other than  
14  
15 228 rehabilitation robots, as previously described, will be excluded. Studies reporting upper limb  
16  
17 229 rehabilitation using rehabilitation robots in body segments other than the affected upper  
18  
19 230 limb will be excluded. Likewise, studies reporting upper limb robotic interventions  
20  
21 231 conducted concurrently with other robotic interventions for other body segments,  
22  
23 232 presented as a whole and not sufficiently distinguished from one another, will be excluded.  
24  
25  
26  
27  
28  
29  
30  
31 233 This review will include professionals who provide stroke upper limb rehabilitation using  
32  
33 234 rehabilitation robots. The rehabilitation professionals may be experts in upper limb  
34  
35 235 rehabilitation, such as physiatrists, physical therapists, occupational therapists, hand  
36  
37 236 therapists, or rehabilitation nurses. Other professionals such as emergency physicians,  
38  
39 237 geriatricians, neurologists, neurosurgeons, or other physicians involved only in the medical  
40  
41 238 or surgical management of patients with stroke who do not provide active upper limb  
42  
43 239 rehabilitation will be excluded. Similarly, rehabilitation engineers, robotic engineers,  
44  
45 240 biomedical engineers, orthotists, and other specialists who are typically not directly involved  
46  
47 241 in physical rehabilitation or clinical care for stroke patients will also be excluded. Robotic  
48  
49 242 upper limb rehabilitation provided by students, healthcare assistants, or technicians, who  
50  
51 243 may not be competent to practice independently, will be excluded. Likewise, robotic upper  
52  
53  
54  
55  
56  
57  
58  
59  
60

1  
2  
3 244 limb rehabilitation provided by non-professional caregivers, family caregivers, volunteer  
4  
5  
6 245 caregivers, or other informal caregivers will also be excluded.  
7  
8

9 246 Phenomena of interest  
10  
11  
12

13 247 In this review, studies that describe the experiences of patients after a stroke and/or their  
14  
15 248 rehabilitation professional with upper limb rehabilitation robots will be considered. Patients'  
16  
17 249 experiences during or after the use of upper limb rehabilitation robots for stroke can be  
18  
19  
20 250 positive or negative, describe complications/adverse events or any other experiences.  
21  
22 251 Rehabilitation professionals' experiences may include facilitators and barriers, encounters,  
23  
24 252 perspectives, or opinions associated with preparing for or providing upper limb  
25  
26  
27 253 rehabilitation in stroke using rehabilitation robots.  
28  
29

30  
31 254 Context  
32  
33  
34

35 255 The context will not be restricted in this review. This review will consider studies that  
36  
37 256 present patients after a stroke or rehabilitation professionals' experiences of providing  
38  
39 257 upper limb rehabilitation using rehabilitation robots in any clinical setting during any phase  
40  
41  
42 258 of stroke rehabilitation. These settings may include outpatient, inpatient, community-based,  
43  
44 259 or home-based intervention services or other therapeutic settings. This review is not  
45  
46  
47 260 restricted to geographical locations, funding mechanisms, healthcare facilities, or services.  
48  
49

50 261 Types of studies  
51  
52  
53

54 262 This review will consider studies that focus on qualitative data, including, but not limited to,  
55  
56 263 designs such as qualitative descriptive, phenomenology, grounded theory, ethnography, and  
57  
58  
59  
60

1  
2  
3 264 action research. This review will also consider the qualitative results of mixed-method  
4  
5  
6 265 studies.

7  
8  
9 266 **Methods**

10  
11  
12  
13 267 The proposed systematic review will be conducted in accordance with the JBI methodology  
14  
15 268 for systematic reviews of qualitative evidence.[30] The review will commence in October  
16  
17  
18 269 2022 and end in September 2023. The review protocol is registered in PROSPERO  
19  
20 270 (CRD42022321402).

21  
22  
23  
24 271 **Search strategy**

25  
26  
27 272 The search strategy will aim to locate both published and unpublished studies. A three-step  
28  
29  
30 273 search strategy will be utilised in this review. First, a pilot initial limited search of MEDLINE  
31  
32 274 (Ovid) and CINAHL (EBSCOhost) was undertaken to identify articles on the topic. The text  
33  
34  
35 275 words contained in the titles and abstracts of relevant articles and the index terms (such as  
36  
37 276 MeSH terms) used to describe the articles were used to develop a full search strategy for  
38  
39  
40 277 MEDLINE (Ovid) (see Appendix 1). The search strategy, including all identified keywords and  
41  
42 278 index terms, will be adapted for each included database and/or information source. The  
43  
44  
45 279 reference lists of all included sources of evidence will be screened for additional studies.

46  
47  
48 280 Regardless of the publication date, articles published in English will be included to capture  
49  
50  
51 281 all relevant literature comprehensively. In view of the limited resources available to  
52  
53 282 reviewers to translate literature from other languages, languages other than English will be  
54  
55 283 excluded in this review. The databases will include MEDLINE(Ovid), EMBASE(Elsevier),  
56  
57  
58 284 Cochrane CENTRAL, PsycINFO, Scopus, Web of Science, IEEE and CINAHL(EBSCOhost). Grey  
59  
60

1  
2  
3 285 literature will also be searched through Open Grey, PsyArXiv, bioRxiv, medRxiv, and Google  
4  
5  
6 286 Scholar.  
7  
8

9 287 **Study selection**  
10  
11

12 288 After the search, the citations will be collated and uploaded into EndNote X20 (Clarivate  
13  
14 289 Analytics, PA, USA), and duplicates will be removed. After piloting the eligibility criteria on a  
15  
16 290 sample of citations (between six and eight articles) to ensure consistency in application,[31]  
17  
18 291 two independent reviewers (MC and LV) will screen all titles and abstracts to determine if  
19  
20 292 they meet the review's inclusion criteria and any disagreements will be resolved by mutual  
21  
22 293 agreement in discussion with the third reviewer (VS/SB). Potentially relevant studies will be  
23  
24 294 retrieved in full, and their citation details imported into the JBI System for the Unified  
25  
26 295 Management, Assessment and Review of Information (JBI SUMARI) (JBI, Adelaide,  
27  
28 296 Australia).[32] The full text of selected citations will be assessed in detail against the  
29  
30 297 inclusion criteria by two independent reviewers (MC and LV), and any disagreements will be  
31  
32 298 resolved in discussion with VS/SB. The reasons for the exclusion of full-text papers that do  
33  
34 299 not meet the inclusion criteria will be recorded and reported. The results of the search and  
35  
36 300 the study inclusion process will be reported in full in the final systematic review and  
37  
38 301 presented using a Preferred Reporting Items for Systematic Reviews and Meta-analyses  
39  
40  
41  
42  
43  
44  
45  
46  
47 302 (PRISMA) flow diagram.[33]  
48  
49

50 303 **Assessment of methodological quality**  
51  
52

53  
54 304 Eligible studies will be critically appraised by two independent reviewers for methodological  
55  
56 305 quality using the standard JBI Critical Appraisal Checklist for Qualitative Research.[34] Any  
57  
58 306 disagreements that arise between the reviewers will be resolved through discussion with  
59  
60

1  
2  
3 307 the third reviewer. The results of the critical appraisal will be reported in narrative form and  
4  
5 308 tables. Regardless of the results of their methodological quality, all studies will be included  
6  
7  
8 309 in the data extraction and synthesis process to ensure that all experiences are captured  
9  
10 310 comprehensively, and no evidence is missed. All major quality issues of the included studies  
11  
12  
13 311 will be presented and discussed in the final review report.  
14  
15

#### 16 312 **Data extraction**

17  
18  
19  
20 313 Data will be extracted from studies included in the review by two independent reviewers  
21  
22 314 using the standardised JBI data extraction tool in JBI SUMARI.[32] The data extracted will  
23  
24 315 include specific details about the population, context, culture, geographical location, study  
25  
26 316 methods, and the phenomena of interest relevant to the review objectives, namely  
27  
28 317 experiences of using upper limb rehabilitation robots by patients after a stroke and  
29  
30 318 rehabilitation professionals' experiences of providing stroke upper limb rehabilitation using  
31  
32 319 robots. The findings, and their illustrations, will be extracted verbatim and assigned a level  
33  
34 320 of credibility. Any disagreements that arise between the reviewers will be resolved through  
35  
36 321 discussion with the third reviewer. If necessary, missing or additional data will be requested  
37  
38 322 from the authors. Even after obtaining additional information from the authors, all missing  
39  
40 323 or unclear information that continues to exist will be treated in the review report as missing  
41  
42 324 data.  
43  
44  
45  
46  
47  
48  
49

#### 50 325 **Data synthesis**

51  
52  
53  
54 326 Qualitative research findings where possible, will be pooled using JBI SUMARI with the  
55  
56 327 meta-aggregation approach.[35] This will involve the aggregation or synthesis of findings to  
57  
58 328 generate a set of statements representing that aggregation by assembling the findings and  
59  
60



1  
2  
3 329 categorising these findings based on similarity in meaning. These categories will then be  
4  
5  
6 330 subjected to a synthesis to produce a single comprehensive set of synthesised findings that  
7  
8 331 can be used as a basis for evidence-based practice. Where textual pooling is not possible,  
9  
10 332 the findings will be presented in a narrative form.

### 14 333 **Assessing confidence in the findings**

17 334 The final synthesised findings will be graded according to the ConQual approach for  
18  
19 335 establishing confidence in the output of qualitative research synthesis and presented in a  
20  
21 336 Summary of Findings.[36] The Summary of Findings includes the major elements of the  
22  
23 337 review and details how the ConQual score is developed. The title, population, phenomena  
24  
25 338 of interest, and context for the specific review will be included in the summary of findings.  
26  
27 339 Each synthesised finding from the review will then be presented, along with the type of  
28  
29 340 research informing it, the score for dependability and credibility, and the overall ConQual  
30  
31 341 score.

### 38 342 **Reflexivity and integrity**

41  
42 343 Given that this is a review of qualitative studies, it is important to consider the reviewers'  
43  
44 344 assumptions and preconceptions regarding the phenomenon of interest, as well as other  
45  
46 345 potential influences that may affect the review process.

49  
50 346 This review will be conducted in collaboration. The current review is not funded by public or  
51  
52 347 private sources, and the review team have declared no conflict of interest. As a result, the  
53  
54 348 review is not affected by external influences. The review team includes a robotic engineer,  
55  
56 349 an occupational therapist with experience in using rehabilitation robots, an occupational  
57  
58  
59  
60

1  
2  
3 350 therapist, and a physiotherapist with experience in rehabilitation but not robotics. With the  
4  
5  
6 351 deliberate decision to include reviewers with varying levels of experience with rehabilitation  
7  
8 352 robots and their involvement in all stages of the review process, it is anticipated that any  
9  
10 353 potential influence of individual reviewers' conceptions and preconceptions regarding the  
11  
12  
13 354 phenomenon of interest will be minimised. The review team's experience will provide the  
14  
15 355 necessary expertise for this review.

16  
17  
18  
19 356 A conscious effort will be made to write memos during the data collection and analysis in  
20  
21 357 order to examine and reflect on the reviewer's engagement.[37] This 'memoing' process will  
22  
23 358 include methodological notetaking to explain the procedural aspect and observational  
24  
25 359 comments to explain and explore the reviewer's feelings at different stages of the review  
26  
27 360 process. Moreover, the reviewers have not published a primary qualitative study on the  
28  
29 361 phenomenon of interest, despite having published primary qualitative studies on other  
30  
31 362 topics. The use of the standardised JBI extraction tool for data extraction and following the  
32  
33 363 standard procedures of the meta-aggregation approach for data synthesis, as well as the  
34  
35 364 above-mentioned process of author reflexivity, based on Flemming and Noyes  
36  
37 365 descriptions,[37] are likely to minimise the impact of the review team's preconceptions.  
38  
39 366 Reflexivity and integrity will be maintained throughout the search, data collection and  
40  
41 367 analysis stages.

#### 42 43 44 368 **Patient and public involvement**

45  
46 369 Patients and members of the public were not involved in the planning of this protocol.

#### 47 48 49 370 **DISCUSSION**

1  
2  
3 371 The main aim of this review is to describe the experiences of patients after a stroke and  
4  
5  
6 372 rehabilitation professionals' experiences with upper limb rehabilitation robots. The results  
7  
8 373 from this review are expected to inform better understanding of the use of upper limb  
9  
10 374 rehabilitation robots, perceptions, opinions, facilitators, and barriers to their use. This  
11  
12  
13 375 review will highlight current research and available evidence in this important and emerging  
14  
15 376 topic area in upper limb rehabilitation after a stroke. The findings from this review will be  
16  
17 377 published and disseminated in journals, conferences and social media, and it is anticipated  
18  
19 378 that the findings from this review will be useful for patients after a stroke, rehabilitation  
20  
21 379 professionals, commissioners of health and care services and developers of rehabilitation  
22  
23 380 robots to inform better provision and ongoing care for patients after a stroke.  
24  
25  
26  
27  
28

29 **FIGURE LEGENDS:**

30  
31  
32 382 **Figure 1** illustrates an example of upper limb training using an end-effector robot, H-man.

33  
34  
35 383 \*Note: The person shown in the picture is not a patient and was taken with the participant's  
36  
37 384 knowledge and permission. Picture courtesy of Articares.

38  
39  
40  
41 385 **Figure 2** illustrates an example of upper limb training using an end-effector robot,

42  
43 386 MO.TO.RE. \*Note: The person shown in the picture is not a patient and was taken with the  
44  
45 387 participant's knowledge and permission. Picture courtesy of Humanware S.r.l.

46  
47  
48  
49 388 **Figure 3** illustrates an example of upper limb training using an exoskeleton robot,

50  
51 389 ArmeoPower. \*Note: The person shown in the picture is not a patient and was taken with  
52  
53 390 the participant's knowledge and permission. Picture courtesy of Hocoma.

1  
2  
3 391 **Figure 4** illustrates an example of an upper limb exosuit robot described by Hoang et al.  
4  
5  
6 392 being worn by a volunteer. \*Note: The person shown in the picture is not a patient and was  
7  
8 393 taken with the participant's knowledge and permission. Picture courtesy of Dr Thanh Nho  
9  
10 394 Do.

11  
12  
13  
14 395 **ABBREVIATIONS:**

15  
16  
17 396 CINAHL: Cumulative Index of Nursing and Allied Health Literature

18  
19  
20 397 PRISMA: Preferred Reporting Items for Systematic Reviews and Meta-Analyses

21  
22 398 PROSPERO: International Prospective Register of Systematic Reviews

23  
24  
25 399 JBI SUMARI: JBI System for the Unified Management, Assessment and Review of  
26  
27 400 Information

28  
29  
30  
31 401 **AUTHOR CONTRIBUTIONS:**

32  
33  
34 402 MC was responsible for the conceptualisation and design of the study with critical inputs

35  
36  
37 403 from LV, VS, and SB. MC developed the search strategy and conducted the search with

38  
39 404 critical input from LV, VS, and SB. The protocol was drafted by MC with important

40  
41 405 intellectual input and revisions from LV, VS, and SB. All authors have read and given

42  
43  
44 406 approval for this version and agree to be accountable for all aspects of the work. MC is the  
45  
46 407 guarantor of the review.

47  
48  
49  
50 408 **FUNDING STATEMENT:**

51  
52  
53  
54 409 This research received no specific grant from any funding agency in the public, commercial

55  
56 410 or not-for-profit sectors.  
57  
58  
59  
60

1  
2  
3 411 **CONFLICT OF INTERESTS STATEMENT:**  
4  
5

6  
7 412 The authors declare that there are no competing interests or conflicting interests.  
8  
9

10 413 **DATA STATEMENT:**  
11  
12

13  
14 414 There are currently no data associated with this protocol. However, this protocol is

15  
16 415 published in PROSPERO. Details of this citation are as follows  
17

18  
19  
20 416 Manigandan Chockalingam, Lenny Vasanthan T, Sivakumar Balasubramanian, Vimal Sriram.

21  
22 417 Stroke patients and their healthcare providers' experiences of upper limb rehabilitation  
23

24  
25 418 robotics: a qualitative systematic review protocol. PROSPERO 2022 CRD42022321402  
26

27 419 Available  
28

29  
30 420 from: [https://www.crd.york.ac.uk/prospero/display\\_record.php?ID=CRD42022321402](https://www.crd.york.ac.uk/prospero/display_record.php?ID=CRD42022321402)  
31  
32

33 421 **REFERENCES**  
34  
35

36  
37 422 1. Xue X, Yang X, Deng Z, *et al.* Global Trends and Hotspots in Research on  
38  
39 423 Rehabilitation Robots: A Bibliometric Analysis From 2010 to 2020. *Front Public*  
40  
41 424 *Health* 2022;9:806723. doi:10.3389/fpubh.2021.806723  
42  
43

44  
45 425 pmid:<http://www.ncbi.nlm.nih.gov/pubmed/35087788>  
46  
47

48 426 2. Wu J, Cheng H, Zhang J, *et al.* Robot-Assisted Therapy for Upper Extremity Motor  
49

50 427 Impairment After Stroke: A Systematic Review and Meta-Analysis. *Phys Ther*

51  
52 428 2021;101(4):pzab010. doi:10.1093/ptj/pzab010  
53

54  
55 429 pmid:<http://www.ncbi.nlm.nih.gov/pubmed/33454787>  
56  
57  
58  
59  
60

- 1  
2  
3 430 3. Doumas I, Everard G, Dehem S, *et al.* Serious games for upper limb rehabilitation  
4  
5  
6 431 after stroke: a meta-analysis. *J Neuroeng Rehabil* 2021;18(1):100.  
7  
8 432 doi:10.1186/s12984-021-00889-1  
9  
10  
11 433 pmid:http://www.ncbi.nlm.nih.gov/pubmed/34130713  
12  
13  
14 434 4. Gandolfi M, Valè N, Dimitrova EK, *et al.* Effectiveness of Robot-Assisted Upper Limb  
15  
16 435 Training on Spasticity, Function and Muscle Activity in Chronic Stroke Patients  
17  
18 436 Treated With Botulinum Toxin: A Randomized Single-Blinded Controlled Trial. *Front*  
19  
20 437 *Neurol* 2019;10:41. doi:10.3389/fneur.2019.00041  
21  
22  
23  
24 438 pmid:http://www.ncbi.nlm.nih.gov/pubmed/30766508  
25  
26  
27 439 5. Budhota A, Chua KSG, Hussain A, *et al.* Robotic Assisted Upper Limb Training Post  
28  
29 440 Stroke: A Randomized Control Trial Using Combinatory Approach Toward Reducing  
30  
31 441 Workforce Demands. *Front Neurol* 2021;12:622014. doi:10.3389/fneur.2021.622014  
32  
33  
34  
35 442 pmid:http://www.ncbi.nlm.nih.gov/pubmed/34149587  
36  
37  
38 443 6. Calabrò RS, Naro A, Russo M, *et al.* Is two better than one? Muscle vibration plus  
39  
40 444 robotic rehabilitation to improve upper limb spasticity and function: A pilot  
41  
42 445 randomized controlled trial. *PLoS One* 2017;12(10):e0185936.  
43  
44  
45 446 doi:10.1371/journal.pone.0185936  
46  
47  
48 447 pmid:http://www.ncbi.nlm.nih.gov/pubmed/28973024  
49  
50  
51 448 7. Hoang TT, Sy L, Bussu M, *et al.* A Wearable Soft Fabric Sleeve for Upper Limb  
52  
53 449 Augmentation. *Sensors (Basel)*. 2021;21(22):7638. doi:10.3390/s21227638  
54  
55  
56 450 pmid:http://www.ncbi.nlm.nih.gov/pubmed/34833719  
57  
58  
59  
60

- 1  
2  
3 451 8. Garcia-Bernal MI, Heredia-Rizo AM, Gonzalez-Garcia P, *et al.* Validity and reliability of  
4  
5  
6 452 myotonometry for assessing muscle viscoelastic properties in patients with stroke: a  
7  
8 453 systematic review and meta-analysis. *Sci Rep* 2021;11(1):5062. doi:10.1038/s41598-  
9  
10  
11 454 021-84656-1 pmid:<http://www.ncbi.nlm.nih.gov/pubmed/33658623>  
12  
13  
14 455 9. Tran VD, Dario P, Mazzoleni S. Kinematic measures for upper limb robot-assisted  
15  
16 456 therapy following stroke and correlations with clinical outcome measures: A review.  
17  
18  
19 457 *Med Eng Phys* 2018;53:13-31. doi:10.1016/j.medengphy.2017.12.005 Epub 2018 Feb  
20  
21  
22 458 1. pmid:<http://www.ncbi.nlm.nih.gov/pubmed/29361407>  
23  
24  
25 459 10. Mehrholz J, Pollock A, Pohl M, *et al.* Systematic review with network meta-analysis  
26  
27 460 of randomised controlled trials of robotic-assisted arm training for improving  
28  
29  
30 461 activities of daily living and upper limb function after stroke. *J Neuroeng Rehabil*  
31  
32 462 2020;17(1):83. doi:10.1186/s12984-020-00715-0  
33  
34  
35 463 pmid:<http://www.ncbi.nlm.nih.gov/pubmed/32605587>  
36  
37  
38 464 11. Dupont PE, Nelson BJ, Goldfarb M, Hannaford B, Menciassi A, O'Malley MK, Simaan  
39  
40 465 N, Valdastrri P, Yang GZ. A decade retrospective of medical robotics research from  
41  
42  
43 466 2010 to 2020. *Sci Robot.* 2021 Nov 10;6(60):eabi8017. doi:  
44  
45 467 10.1126/scirobotics.abi8017. Epub 2021 Nov 10. PMID: 34757801; PMCID:  
46  
47  
48 468 PMC8890492.  
49  
50 469 12. Moggio L, de Sire A, Marotta N, *et al.* Exoskeleton versus end-effector robot-assisted  
51  
52  
53 470 therapy for finger-hand motor recovery in stroke survivors: systematic review and  
54  
55 471 meta-analysis. *Top Stroke Rehabil* 2021:1-12. doi:10.1080/10749357.2021.1967657  
56  
57  
58 472 Epub ahead of print. pmid:<http://www.ncbi.nlm.nih.gov/pubmed/34420498>  
59  
60

- 1  
2  
3 473 13. Abe T, Koizumi S, Nabae H, *et al.* Fabrication of "18 Weave" Muscles and Their  
4  
5  
6 474 Application to Soft Power Support Suit for Upper Limbs Using Thin McKibben Muscle.  
7  
8 475 *IEEE Robotics and Automation Letters* 2019;4(3):2532-8.  
9  
10 476 doi:10.1109/LRA.2019.2907433  
11  
12  
13 477 14. Xiloyannis M, Alicea R, Georgarakis AM, *et al.* Soft Robotic Suits: State of the Art,  
14  
15 478 Core Technologies, and Open Challenges. *IEEE Transactions on Robotics* 2021;1-20.  
16  
17 479 doi:10.1109/TRO.2021.3084466  
18  
19  
20 480 15. Lo K, Stephenson M, Lockwood C. Adoption of robotic stroke rehabilitation into  
21  
22 481 clinical settings: a qualitative descriptive analysis. *JBI Evid Implement*  
23  
24 482 2020;18(4):376-390. doi:10.1097/XEB.0000000000000231  
25  
26 483 pmid:http://www.ncbi.nlm.nih.gov/pubmed/33570321  
27  
28  
29  
30  
31 484 16. Jayasree-Krishnan V, Ghosh S, Palumbo A, *et al.* Developing a Framework for  
32  
33 485 Designing and Deploying Technology-Assisted Rehabilitation After Stroke: A  
34  
35 486 Qualitative Study. *Am J Phys Med Rehabil* 2021;100(8):774-779.  
36  
37 487 doi:10.1097/PHM.0000000000001634  
38  
39 488 pmid:http://www.ncbi.nlm.nih.gov/pubmed/33141773  
40  
41  
42  
43  
44 489 17. Renaud K, Van Biljon J. Predicting technology acceptance and adoption by the  
45  
46 490 elderly: a qualitative study. *ACM Int Conf Proceeding Ser* 2008;338:210-9.  
47  
48  
49 491 18. Niknejad N, Ismail W, Bahari M, *et al.* Understanding Telerehabilitation Technology  
50  
51 492 to Evaluate Stakeholders' Adoption of Telerehabilitation Services: A Systematic  
52  
53 493 Literature Review and Directions for Further Research. *Arch Phys Med Rehabil*  
54  
55 494 2021;102(7):1390-1403. doi: 10.1016/j.apmr.2020.12.014. Epub 2021 Jan 20.  
56  
57 495 pmid:http://www.ncbi.nlm.nih.gov/pubmed/33484693.  
58  
59  
60



- 1  
2  
3 496 19. Pereira CM, Greenwood N, Jones F. From recovery to regaining control of life - the  
4  
5  
6 497 perspectives of people with stroke, their carers and health professionals. *Disabil*  
7  
8 498 *Rehabil* 2021;43(20):2897-2908. doi:10.1080/09638288.2020.1722263 Epub 2020  
9  
10  
11 499 Feb 8. pmid:<http://www.ncbi.nlm.nih.gov/pubmed/32036730>  
12  
13  
14 500 20. Lapidou D, Curtis F, Akanuwa J, *et al.* Patient, carer, and staff perceptions of  
15  
16 501 robotics in motor rehabilitation: a systematic review and qualitative meta-synthesis.  
17  
18 502 *J Neuroeng Rehabil* 2021;18(1):181. doi:10.1186/s12984-021-00976-3  
19  
20  
21 503 pmid:<http://www.ncbi.nlm.nih.gov/pubmed/34953497>  
22  
23  
24 504 21. Guo Y, Zhang Z, Lin B, *et al.* The Unmet Needs of Community-Dwelling Stroke  
25  
26 505 Survivors: A Systematic Review of Qualitative Studies. *Int J Environ Res Public Health*  
27  
28 506 2021;18(4):2140. doi:10.3390/ijerph18042140  
29  
30  
31 507 pmid:<http://www.ncbi.nlm.nih.gov/pubmed/33671734>  
32  
33  
34 508 22. Hatem SM, Saussez G, Della Faille M, *et al.* Rehabilitation of Motor Function after  
35  
36 509 Stroke: A Multiple Systematic Review Focused on Techniques to Stimulate Upper  
37  
38 510 Extremity Recovery. *Front Hum Neurosci* 2016;10:442.  
39  
40  
41 511 doi:10.3389/fnhum.2016.00442  
42  
43  
44 512 pmid:<http://www.ncbi.nlm.nih.gov/pubmed/27679565>  
45  
46  
47  
48 513 23. Borschmann KN, Hayward KS. Recovery of upper limb function is greatest early after  
49  
50 514 stroke but does continue to improve during the chronic phase: a two-year,  
51  
52 515 observational study. *Physiotherapy* 2020;107:216-223.  
53  
54  
55 516 doi:10.1016/j.physio.2019.10.001 Epub 2019 Oct 17.  
56  
57  
58 517 pmid:<http://www.ncbi.nlm.nih.gov/pubmed/32026823>  
59  
60

- 1  
2  
3 518 24. Gaspar R, Padula N, Freitas TB, *et al.* Physical Exercise for Individuals With Spinal  
4  
5  
6 519 Cord Injury: Systematic Review Based on the International Classification of  
7  
8 520 Functioning, Disability, and Health. *J Sport Rehabil* 2019;28(5):505-516.  
9  
10 521 doi:10.1123/jsr.2017-0185. Epub 2019 Feb 19  
11  
12  
13 522 pmid:http://www.ncbi.nlm.nih.gov/pubmed/30300056  
14  
15  
16 523 25. Mekki M, Delgado AD, Fry A, *et al.* Robotic Rehabilitation and Spinal Cord Injury: a  
17  
18 524 Narrative Review. *Neurotherapeutics* 2018;15(3):604-617. doi:10.1007/s13311-018-  
19  
20 0642-3 pmid:http://www.ncbi.nlm.nih.gov/pubmed/29987763  
21  
22 525  
23  
24 526 26. Jackman M, Lannin N, Galea C, *et al.* What is the threshold dose of upper limb  
25  
26 527 training for children with cerebral palsy to improve function? A systematic review.  
27  
28 528 *Aust Occup Ther J* 2020;67(3):269-280. doi:10.1111/1440-1630.12666 Epub 2020 Apr  
29  
30 529 27. pmid:http://www.ncbi.nlm.nih.gov/pubmed/32342517  
31  
32  
33 530 27. Bernhardt J, Hayward KS, Kwakkel G, *et al.* Agreed Definitions and a Shared Vision for  
34  
35 531 New Standards in Stroke Recovery Research: The Stroke Recovery and Rehabilitation  
36  
37 532 Roundtable Taskforce. *Neurorehabil Neural Repair* 2017 Sep;31(9):793-799  
38  
39 533 doi:10.1177/1545968317732668  
40  
41 534 pmid:http://www.ncbi.nlm.nih.gov/pubmed/28934920  
42  
43  
44 535 28. International Organization for Standardization (2019b). Medical electrical equipment  
45  
46 536 — Part 2-78: particular requirements for basic safety and essential performance of  
47  
48 537 medical robots for rehabilitation, assessment, compensation or alleviation. IEC  
49  
50 538 80601-2-78:2019. Available at: <https://www.iso.org/standard/68474.html>.  
51  
52  
53  
54  
55  
56  
57  
58  
59  
60

- 1  
2  
3 539 29. Bessler J, Prange-Lasonder GB, Schaake L, *et al.* Safety Assessment of Rehabilitation  
4  
5  
6 540 Robots: A Review Identifying Safety Skills and Current Knowledge Gaps. *Front Robot*  
7  
8 541 *AI* 2021;8:602878. doi:10.3389/frobt.2021.602878  
9  
10  
11 542 pmid:http://www.ncbi.nlm.nih.gov/pubmed/33937345  
12  
13  
14 543 30. Lockwood C, Porrit K, Munn Z, *et al.* Chapter 2: Systematic reviews of qualitative  
15  
16 544 evidence. Joanna Briggs Institute, Joanna Briggs Institute Reviewer's Manual  
17  
18 545 [Internet]. Adelaide: 2017.  
19  
20  
21 546 31. Lefebvre C, Glanville J, Briscoe S, *et al.* Chapter 4: Searching for and selecting studies.  
22  
23 547 Cochrane Handbook for Systematic Reviews of Interventions version 6.3 [Internet].  
24  
25 548 Cochrane: 2022.  
26  
27  
28 549 32. Munn Z, Aromataris E, Tufanaru C, *et al.* The development of software to support  
29  
30 550 multiple systematic review types: the Joanna Briggs Institute System for the Unified  
31  
32 551 Management, Assessment and Review of Information (JBI SUMARI). *Int J Evid Based*  
33  
34 552 *Healthc* 2019;17(1):36-43. doi:10.1097/XEB.0000000000000152  
35  
36 553 pmid:http://www.ncbi.nlm.nih.gov/pubmed/30239357  
37  
38  
39 554 33. Page MJ, McKenzie JE, Bossuyt PM, *et al.* The PRISMA 2020 statement: An updated  
40  
41 555 guideline for reporting systematic reviews. *J Clin Epidemiol* 2021;134:178-189.  
42  
43 556 pmid:http://www.ncbi.nlm.nih.gov/pubmed/33789819  
44  
45  
46  
47 557 34. Joanna Briggs Institute. Checklist for Qualitative Research [Internet]. Adelaide:  
48  
49 558 Joanna Briggs Institute; 2017 [cited 2021 Nov 26]. Available from:  
50  
51 559 [https://joannabriggs.org/sites/default/files/2019-05/JBI\\_Critical\\_Appraisal-](https://joannabriggs.org/sites/default/files/2019-05/JBI_Critical_Appraisal-Checklist_for_Qualitative_Research2017_0.pdf)  
52  
53 560 [Checklist\\_for\\_Qualitative\\_Research2017\\_0.pdf](https://joannabriggs.org/sites/default/files/2019-05/JBI_Critical_Appraisal-Checklist_for_Qualitative_Research2017_0.pdf)  
54  
55  
56  
57  
58  
59  
60

- 1  
2  
3 561 35. Lockwood C, Munn Z, Porritt K. Qualitative research synthesis: methodological  
4  
5 562 guidance for systematic reviewers utilizing meta-aggregation. *Int J Evid Based*  
6  
7 *Healthc* 2015;13(3):179-87 pmid:<http://www.ncbi.nlm.nih.gov/pubmed/26262565>  
8 563  
9  
10 564 36. Munn Z, Porritt K, Lockwood C, et al. Establishing confidence in the output of  
11  
12 qualitative research synthesis: the ConQual approach. *BMC Med Res Methodol*  
13 565  
14 2014;14:108. pmid:<http://www.ncbi.nlm.nih.gov/pubmed/25927294>  
15 566  
16  
17 567 37. Flemming K, Noyes J. Qualitative Evidence Synthesis: Where Are We at? *Int J Qual*  
18  
19 *Methods* 2021;20:10.1177/1609406921993276. doi:10.1177/1609406921993276  
20 568  
21  
22  
23  
24  
25  
26  
27  
28  
29  
30  
31  
32  
33  
34  
35  
36  
37  
38  
39  
40  
41  
42  
43  
44  
45  
46  
47  
48  
49  
50  
51  
52  
53  
54  
55  
56  
57  
58  
59  
60



Figure 1 illustrates an example of upper limb training using an end-effector robot, H-man. \*Note: The person shown in the picture is not a patient and was taken with the participant's knowledge and permission. Picture courtesy of Articares.

724x254mm (300 x 300 DPI)

1  
2  
3  
4  
5  
6  
7  
8  
9  
10  
11  
12  
13  
14  
15  
16  
17  
18  
19  
20  
21  
22  
23  
24  
25  
26  
27  
28  
29  
30  
31  
32  
33  
34  
35  
36  
37  
38  
39  
40  
41  
42  
43  
44  
45  
46  
47  
48  
49  
50  
51  
52  
53  
54  
55  
56  
57  
58  
59  
60

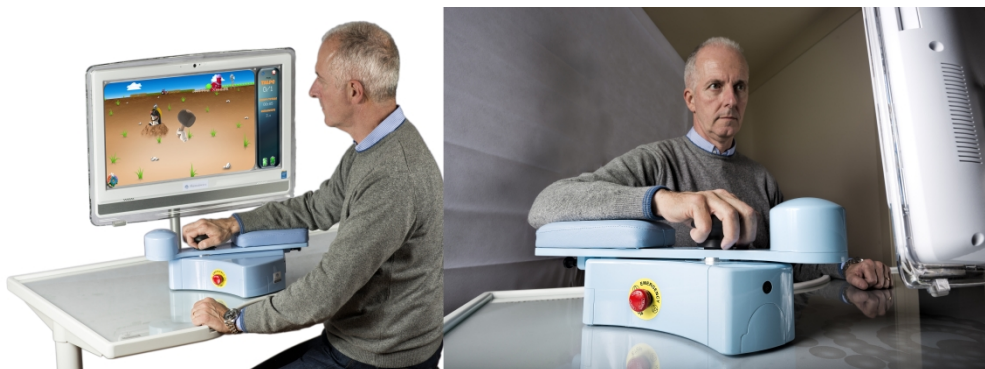

Figure 2 illustrates an example of upper limb training using an end-effector robot, MO.TO.RE. \*Note: The person shown in the picture is not a patient and was taken with the participant's knowledge and permission. Picture courtesy of Humanware S.r.l.

721x265mm (300 x 300 DPI)



Figure 3 illustrates an example of upper limb training using an exoskeleton robot, ArmeoPower. \*Note: The person shown in the picture is not a patient and was taken with the participant's knowledge and permission. Picture courtesy of Hocoma.

718x239mm (300 x 300 DPI)

1  
2  
3  
4  
5  
6  
7  
8  
9  
10  
11  
12  
13  
14  
15  
16  
17  
18  
19  
20  
21  
22  
23  
24  
25  
26  
27  
28  
29  
30  
31  
32  
33  
34  
35  
36  
37  
38  
39  
40  
41  
42  
43  
44  
45  
46  
47  
48  
49  
50  
51  
52  
53  
54  
55  
56  
57  
58  
59  
60

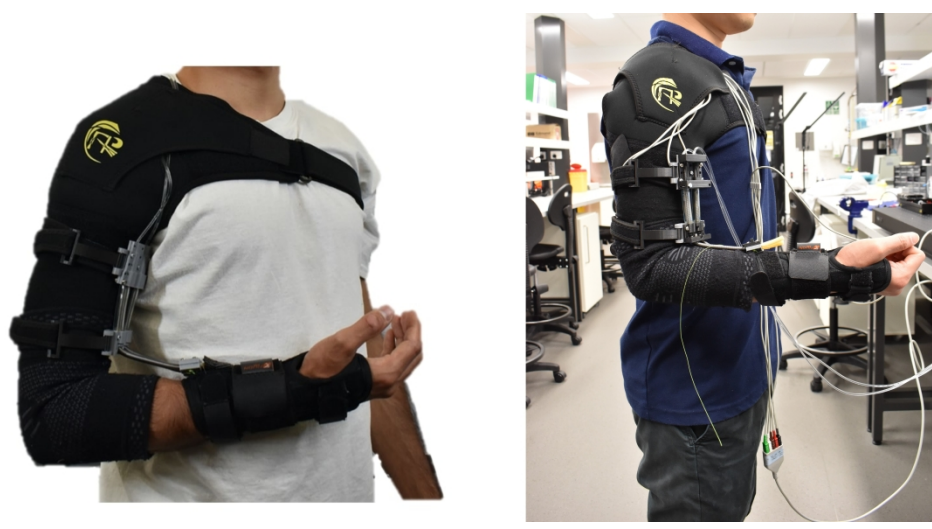

Figure 4 illustrates an example of an upper limb exosuit robot described by Hoang et al. being worn by a volunteer. \*Note: The person shown in the picture is not a patient and was taken with the participant's knowledge and permission. Picture courtesy of Dr Thanh Nho Do.

618x314mm (300 x 300 DPI)



Ovid MEDLINE(R) ALL <1946 to May 20, 2022>

1 exp Psychiatrists/ or exp Health Personnel/ or exp Allied Health Personnel/ or exp Physicians/  
 2 or exp Primary Health Care/ or exp Nurses/ or exp Family Nurse Practitioners/ or exp Nurse  
 3 Practitioners/ or exp Physical Therapists/ or exp Occupational Therapists/ or health personnel.mp. or  
 4 healthcare professional\*.mp. or health-care professional\*.mp. or health care professional\*.mp. or  
 5 allied health professional\*.mp. or doctor\*.mp. or physician\*.mp. or geriatric\*.mp. or rescriber\*.mp.  
 6 or primary healthcare.mp. or paramedic\*.mp. or family nurse.mp. or nurse.mp. or community  
 7 nurse.mp. or physio\*.mp. or physiotherapist.mp. or physio therapist.mp. or physical therapist.mp. or  
 8 hand therapist.mp. or self treatment.mp. or (Caregiver support regime therapy or Carer).mp. or  
 9 Caregivers/ or (health care professional or health care professionals or health care provider or health  
 10 care providers or healthcare provider or healthcare providers or healthcare worker or healthcare  
 11 workers or personnel, health or professional, health care or provider, health care or provider,  
 12 healthcare).mp. (Records Retrieved – 7196481)

2 exp "Attitude of Health Personnel"/ or exp Attitude/ or exp Occupational Stress/ or exp  
 3 "Delivery of Health Care"/ or exp Qualitative Research/ or experience\*.mp. or feel\*.mp. or  
 4 encounter\*.mp. or perception\*.mp. or opinion\*.mp. (Records Retrieved – 3027183)

5 1 and 2 (Records Retrieved – 1094496)

6 exp "Quality of Health Care"/ or exp Patient Satisfaction/ or exp Patient Compliance/ or exp  
 7 Compliance/ or exp "Patient Acceptance of Health Care"/ or exp "Treatment Adherence and  
 8 Compliance"/ or exp Patient Dropouts/ or exp Treatment Refusal/ or exp Patient Participation/ or  
 9 exp Psychological Distress/ or exp Health Behavior/ or exp "Quality of Life"/ or exp Attitude/ or exp  
 10 Qualitative Research/ or patient satisfaction.mp. or patient acceptance.mp. or patient dropout\*.mp.  
 11 or patient participation.mp. or treatment refus\*.mp. or experience\*.mp. or feel\*.mp. or  
 12 encounter\*.mp. or perception\*.mp. or opinion\*.mp. (Records Retrieved – 9171170)

13 3 or 4 (Records Retrieved – 9292409)

14 exp cerebrovascular disorders/ or exp basal ganglia cerebrovascular disease/ or exp brain  
 15 ischemia/ or exp carotid artery diseases/ or exp cerebral small vessel diseases/ or exp intracranial  
 16 arterial diseases/ or exp "intracranial embolism and thrombosis"/ or exp intracranial hemorrhages/  
 17 or stroke/ or exp brain infarction/ or stroke, lacunar/ or vasospasm, intracranial/ or vertebral artery  
 18 dissection/ or brain injuries/ or brain injury, chronic/ or (stroke\* or poststroke or apoplex\* or  
 19 cerebral vasc\* or brain vasc\* or cerebrovasc\* or cva\* or SAH).mp. or ((brain or cerebr\* or cerebell\*  
 20 or vertebrobasil\* or hemispher\* or intracran\* or intracerebral or infratentorial or supratentorial or  
 21 middle cerebral artery or MCA\* or anterior circulation or posterior circulation or basilar artery or  
 22 vertebral artery or space-occupying) adj5 (isch?emi\* or infarct\* or thrombo\* or emboli\* or occlus\*  
 23 or hypoxi\*).mp. or ((brain\* or cerebr\* or cerebell\* or intracerebral or intracran\* or parenchymal or  
 24 intraparenchymal or intraventricular or infratentorial or supratentorial or basal gangli\* or putaminal  
 25 or putamen or posterior fossa or hemispher\* or subarachnoid) adj5 (h?emorrhag\* or h?ematoma\*  
 26 or bleed\*).mp. or hemiplegia/ or exp paresis/ or (hemipleg\* or hemipar\* or paresis or paretic or  
 27 brain injur\*).mp. (Records Retrieved – 805510)

28 exp upper extremity/ or (upper limb\* or upper extremit\* or arm or arms or shoulder or  
 29 shoulders or hand or hands or axilla\* or elbow\* or forearm\* or finger\* or wrist\*).mp. (Records  
 30 Retrieved – 1087124)

1  
2  
3 8 robotics/ or automation/ or orthotic devices/ or "equipment and supplies"/ or self-help  
4 devices/ or therapy, computer-assisted/ or man-machine systems/ or (robot\* or orthos\* or orthotic  
5 or automat\* or computer aided or computer assisted or device\*).mp. or (electromechanical or  
6 electro-mechanical or mechanical or mechanised or mechanized or driven).mp. or exercise  
7 movement techniques/ or exercise/ or exercise therapy/ or muscle stretching techniques/ or motion  
8 therapy, continuous passive/ or ((continuous passive or cpm) adj3 therap\*).mp. or (assist\* adj5  
9 (train\* or aid\* or rehabilitat\* or re-educat\*).mp. (Records Retrieved – 2054580)  
10  
11

12 9 5 and 6 and 7 and 8 (Records Retrieved – 4059)  
13  
14  
15  
16  
17  
18  
19  
20  
21  
22  
23  
24  
25  
26  
27  
28  
29  
30  
31  
32  
33  
34  
35  
36  
37  
38  
39  
40  
41  
42  
43  
44  
45  
46  
47  
48  
49  
50  
51  
52  
53  
54  
55  
56  
57  
58  
59  
60

For peer review only

**S1 Table:** Preferred reporting items for systematic review and meta-analysis protocols (PRISMA-P) 2015 statement. Systematic Reviews 2015 4:1

| Section/topic                     | #  | Checklist item                                                                                                                                                                                  | Information reported                |                                     | Line number(s)       |
|-----------------------------------|----|-------------------------------------------------------------------------------------------------------------------------------------------------------------------------------------------------|-------------------------------------|-------------------------------------|----------------------|
|                                   |    |                                                                                                                                                                                                 | Yes                                 | No                                  |                      |
| <b>ADMINISTRATIVE INFORMATION</b> |    |                                                                                                                                                                                                 |                                     |                                     |                      |
| <b>Title</b>                      |    |                                                                                                                                                                                                 |                                     |                                     |                      |
| Identification                    | 1a | Identify the report as a protocol of a systematic review                                                                                                                                        | <input checked="" type="checkbox"/> | <input type="checkbox"/>            | 4, 50                |
| Update                            | 1b | If the protocol is for an update of a previous systematic review, identify as such                                                                                                              | <input type="checkbox"/>            | <input checked="" type="checkbox"/> | N/A.                 |
| <b>Registration</b>               | 2  | If registered, provide the name of the registry (e.g., PROSPERO) and registration number in the Abstract                                                                                        | <input checked="" type="checkbox"/> | <input type="checkbox"/>            | 79, 269-270, 414-420 |
| <b>Authors</b>                    |    |                                                                                                                                                                                                 |                                     |                                     |                      |
| Contact                           | 3a | Provide name, institutional affiliation, and e-mail address of all protocol authors; provide physical mailing address of corresponding author                                                   | <input checked="" type="checkbox"/> | <input type="checkbox"/>            | 5-42                 |
| Contributions                     | 3b | Describe contributions of protocol authors and identify the guarantor of the review                                                                                                             | <input checked="" type="checkbox"/> | <input type="checkbox"/>            | 401-407              |
| <b>Amendments</b>                 | 4  | If the protocol represents an amendment of a previously completed or published protocol, identify as such and list changes; otherwise, state plan for documenting important protocol amendments | <input type="checkbox"/>            | <input checked="" type="checkbox"/> | N/A                  |
| <b>Support</b>                    |    |                                                                                                                                                                                                 |                                     |                                     |                      |
| Sources                           | 5a | Indicate sources of financial or other support for the review                                                                                                                                   | <input checked="" type="checkbox"/> | <input type="checkbox"/>            | 408-410              |
| Sponsor                           | 5b | Provide name for the review funder and/or sponsor                                                                                                                                               | <input checked="" type="checkbox"/> | <input type="checkbox"/>            | 408-410              |
| Role of sponsor/funder            | 5c | Describe roles of funder(s), sponsor(s), and/or institution(s), if any, in developing the protocol                                                                                              | <input checked="" type="checkbox"/> | <input type="checkbox"/>            | 408-410              |
| <b>INTRODUCTION</b>               |    |                                                                                                                                                                                                 |                                     |                                     |                      |
| <b>Rationale</b>                  | 6  | Describe the rationale for the review in the context of what is already known                                                                                                                   | <input checked="" type="checkbox"/> | <input type="checkbox"/>            | 111-172              |

| Section/topic                      | #   | Checklist item                                                                                                                                                                                                            | Information reported                |                                     | Line number(s)         |
|------------------------------------|-----|---------------------------------------------------------------------------------------------------------------------------------------------------------------------------------------------------------------------------|-------------------------------------|-------------------------------------|------------------------|
|                                    |     |                                                                                                                                                                                                                           | Yes                                 | No                                  |                        |
| <b>Objectives</b>                  | 7   | Provide an explicit statement of the question(s) the review will address with reference to participants, interventions, comparators, and outcomes (PICO)                                                                  | <input checked="" type="checkbox"/> | <input type="checkbox"/>            | 174 -178               |
| <b>METHODS</b>                     |     |                                                                                                                                                                                                                           |                                     |                                     |                        |
| <b>Eligibility criteria</b>        | 8   | Specify the study characteristics (e.g., PICO, study design, setting, time frame) and report characteristics (e.g., years considered, language, publication status) to be used as criteria for eligibility for the review | <input checked="" type="checkbox"/> | <input type="checkbox"/>            | 185- 265               |
| <b>Information sources</b>         | 9   | Describe all intended information sources (e.g., electronic databases, contact with study authors, trial registers, or other grey literature sources) with planned dates of coverage                                      | <input checked="" type="checkbox"/> | <input type="checkbox"/>            | 280-286                |
| <b>Search strategy</b>             | 10  | Present draft of search strategy to be used for at least one electronic database, including planned limits, such that it could be repeated                                                                                | <input checked="" type="checkbox"/> | <input type="checkbox"/>            | 271-286 and Appendix 1 |
| <b>STUDY RECORDS</b>               |     |                                                                                                                                                                                                                           |                                     |                                     |                        |
| Data management                    | 11a | Describe the mechanism(s) that will be used to manage records and data throughout the review                                                                                                                              | <input checked="" type="checkbox"/> | <input type="checkbox"/>            | 287-367                |
| Selection process                  | 11b | State the process that will be used for selecting studies (e.g., two independent reviewers) through each phase of the review (i.e., screening, eligibility, and inclusion in meta-analysis)                               | <input checked="" type="checkbox"/> | <input type="checkbox"/>            | 287-302                |
| Data collection process            | 11c | Describe planned method of extracting data from reports (e.g., piloting forms, done independently, in duplicate), any processes for obtaining and confirming data from investigators                                      | <input checked="" type="checkbox"/> | <input type="checkbox"/>            | 312-324                |
| <b>Data items</b>                  | 12  | List and define all variables for which data will be sought (e.g., PICO items, funding sources), any pre-planned data assumptions and simplifications                                                                     | <input type="checkbox"/>            | <input checked="" type="checkbox"/> | 312-324                |
| <b>Outcomes and prioritization</b> | 13  | List and define all outcomes for which data will be sought, including                                                                                                                                                     | <input type="checkbox"/>            | <input checked="" type="checkbox"/> | N/A                    |

| Section/topic                             | #   | Checklist item                                                                                                                                                                                                                              | Information reported                |                                     | Line number(s) |
|-------------------------------------------|-----|---------------------------------------------------------------------------------------------------------------------------------------------------------------------------------------------------------------------------------------------|-------------------------------------|-------------------------------------|----------------|
|                                           |     |                                                                                                                                                                                                                                             | Yes                                 | No                                  |                |
|                                           |     | prioritization of main and additional outcomes, with rationale                                                                                                                                                                              |                                     |                                     |                |
| <b>Risk of bias in individual studies</b> | 14  | Describe anticipated methods for assessing risk of bias of individual studies, including whether this will be done at the outcome or study level, or both; state how this information will be used in data synthesis                        | <input checked="" type="checkbox"/> | <input type="checkbox"/>            | 303-311        |
| <b>DATA</b>                               |     |                                                                                                                                                                                                                                             |                                     |                                     |                |
| <b>Synthesis</b>                          | 15a | Describe criteria under which study data will be quantitatively synthesized                                                                                                                                                                 | <input type="checkbox"/>            | <input checked="" type="checkbox"/> | N/A            |
|                                           | 15b | If data are appropriate for quantitative synthesis, describe planned summary measures, methods of handling data, and methods of combining data from studies, including any planned exploration of consistency (e.g., $I^2$ , Kendall's tau) | <input type="checkbox"/>            | <input checked="" type="checkbox"/> | N/A            |
|                                           | 15c | Describe any proposed additional analyses (e.g., sensitivity or subgroup analyses, meta-regression)                                                                                                                                         | <input type="checkbox"/>            | <input checked="" type="checkbox"/> | N/A            |
|                                           | 15d | If quantitative synthesis is not appropriate, describe the type of summary planned                                                                                                                                                          | <input checked="" type="checkbox"/> | <input type="checkbox"/>            | 325-332        |
| <b>Meta-bias(es)</b>                      | 16  | Specify any planned assessment of meta-bias(es) (e.g., publication bias across studies, selective reporting within studies)                                                                                                                 | <input type="checkbox"/>            | <input checked="" type="checkbox"/> | N/A            |
| <b>Confidence in cumulative evidence</b>  | 17  | Describe how the strength of the body of evidence will be assessed (e.g., GRADE)                                                                                                                                                            | <input checked="" type="checkbox"/> | <input type="checkbox"/>            | 333-341        |

**S1 Table:** Preferred reporting items for systematic review and meta-analysis protocols (PRISMA-P) 2015 statement. Systematic Reviews 2015 4:1

| Section/topic                     | #  | Checklist item                                                                                                                                                                                  | Information reported                |                                     | Line number(s)               |
|-----------------------------------|----|-------------------------------------------------------------------------------------------------------------------------------------------------------------------------------------------------|-------------------------------------|-------------------------------------|------------------------------|
|                                   |    |                                                                                                                                                                                                 | Yes                                 | No                                  |                              |
| <b>ADMINISTRATIVE INFORMATION</b> |    |                                                                                                                                                                                                 |                                     |                                     |                              |
| <b>Title</b>                      |    |                                                                                                                                                                                                 |                                     |                                     |                              |
| Identification                    | 1a | Identify the report as a protocol of a systematic review                                                                                                                                        | <input checked="" type="checkbox"/> | <input type="checkbox"/>            | 4, 50                        |
| Update                            | 1b | If the protocol is for an update of a previous systematic review, identify as such                                                                                                              | <input type="checkbox"/>            | <input checked="" type="checkbox"/> | N/A.                         |
| Registration                      | 2  | If registered, provide the name of the registry (e.g., PROSPERO) and registration number in the Abstract                                                                                        | <input checked="" type="checkbox"/> | <input type="checkbox"/>            | 798, 2692-27063, 38414-39420 |
| <b>Authors</b>                    |    |                                                                                                                                                                                                 |                                     |                                     |                              |
| Contact                           | 3a | Provide name, institutional affiliation, and e-mail address of all protocol authors; provide physical mailing address of corresponding author                                                   | <input checked="" type="checkbox"/> | <input type="checkbox"/>            | 5-42                         |
| Contributions                     | 3b | Describe contributions of protocol authors and identify the guarantor of the review                                                                                                             | <input checked="" type="checkbox"/> | <input type="checkbox"/>            | 37401-37407                  |
| Amendments                        | 4  | If the protocol represents an amendment of a previously completed or published protocol, identify as such and list changes; otherwise, state plan for documenting important protocol amendments | <input type="checkbox"/>            | <input checked="" type="checkbox"/> | N/A                          |
| <b>Support</b>                    |    |                                                                                                                                                                                                 |                                     |                                     |                              |
| Sources                           | 5a | Indicate sources of financial or other support for the review                                                                                                                                   | <input checked="" type="checkbox"/> | <input checked="" type="checkbox"/> | 37408-38410                  |
| Sponsor                           | 5b | Provide name for the review funder and/or sponsor                                                                                                                                               | <input checked="" type="checkbox"/> | <input checked="" type="checkbox"/> | 37408-38410                  |
| Role of sponsor/funder            | 5c | Describe roles of funder(s), sponsor(s), and/or institution(s), if any, in developing the protocol                                                                                              | <input checked="" type="checkbox"/> | <input checked="" type="checkbox"/> | 37408-38410                  |
| <b>INTRODUCTION</b>               |    |                                                                                                                                                                                                 |                                     |                                     |                              |

**Commented [MC1]:** Under support items- I would suggest here selecting the "Yes" answer. Even though you may not have a funder, etc., this information is included in the manuscript/protocol (lines 378-380, as you have noted).

Suggested changes have been made.

| Section/topic               | #   | Checklist item                                                                                                                                                                                                            | Information reported                |                                     | Line number(s)                        |
|-----------------------------|-----|---------------------------------------------------------------------------------------------------------------------------------------------------------------------------------------------------------------------------|-------------------------------------|-------------------------------------|---------------------------------------|
|                             |     |                                                                                                                                                                                                                           | Yes                                 | No                                  |                                       |
| <b>Rationale</b>            | 6   | Describe the rationale for the review in the context of what is already known                                                                                                                                             | <input checked="" type="checkbox"/> | <input type="checkbox"/>            | <del>1106-17266</del>                 |
| <b>Objectives</b>           | 7   | Provide an explicit statement of the question(s) the review will address with reference to participants, interventions, comparators, and outcomes (PICO)                                                                  | <input checked="" type="checkbox"/> | <input type="checkbox"/>            | <del>17468 - 17872</del>              |
| <b>METHODS</b>              |     |                                                                                                                                                                                                                           |                                     |                                     |                                       |
| <b>Eligibility criteria</b> | 8   | Specify the study characteristics (e.g., PICO, study design, setting, time frame) and report characteristics (e.g., years considered, language, publication status) to be used as criteria for eligibility for the review | <input checked="" type="checkbox"/> | <input type="checkbox"/>            | <del>18579- 2659</del>                |
| <b>Information sources</b>  | 9   | Describe all intended information sources (e.g., electronic databases, contact with study authors, trial registers, or other grey literature sources) with planned dates of coverage                                      | <input checked="" type="checkbox"/> | <input type="checkbox"/>            | <del>28073-28679</del>                |
| <b>Search strategy</b>      | 10  | Present draft of search strategy to be used for at least one electronic database, including planned limits, such that it could be repeated                                                                                | <input checked="" type="checkbox"/> | <input type="checkbox"/>            | <del>27164-28679</del> and Appendix 1 |
| <b>STUDY RECORDS</b>        |     |                                                                                                                                                                                                                           |                                     |                                     |                                       |
| Data management             | 11a | Describe the mechanism(s) that will be used to manage records and data throughout the review                                                                                                                              | <input checked="" type="checkbox"/> | <input type="checkbox"/>            | <del>2870-36734</del>                 |
| Selection process           | 11b | State the process that will be used for selecting studies (e.g., two independent reviewers) through each phase of the review (i.e., screening, eligibility, and inclusion in meta-analysis)                               | <input checked="" type="checkbox"/> | <input type="checkbox"/>            | <del>2870-30295</del>                 |
| Data collection process     | 11c | Describe planned method of extracting data from reports (e.g., piloting forms, done independently, in duplicate), any processes for obtaining and confirming data from investigators                                      | <input checked="" type="checkbox"/> | <input type="checkbox"/>            | <del>31205-32447</del>                |
| <b>Data items</b>           | 12  | List and define all variables for which data will be sought (e.g., PICO items,                                                                                                                                            | <input type="checkbox"/>            | <input checked="" type="checkbox"/> | <del>31205-32447</del>                |

| Section/topic                             | #   | Checklist item                                                                                                                                                                                                                              | Information reported                |                                     | Line number(s)                            |
|-------------------------------------------|-----|---------------------------------------------------------------------------------------------------------------------------------------------------------------------------------------------------------------------------------------------|-------------------------------------|-------------------------------------|-------------------------------------------|
|                                           |     |                                                                                                                                                                                                                                             | Yes                                 | No                                  |                                           |
|                                           |     | funding sources), any pre-planned data assumptions and simplifications                                                                                                                                                                      |                                     |                                     |                                           |
| <b>Outcomes and prioritization</b>        | 13  | List and define all outcomes for which data will be sought, including prioritization of main and additional outcomes, with rationale                                                                                                        | <input type="checkbox"/>            | <input checked="" type="checkbox"/> | N/A                                       |
| <b>Risk of bias in individual studies</b> | 14  | Describe anticipated methods for assessing risk of bias of individual studies, including whether this will be done at the outcome or study level, or both; state how this information will be used in data synthesis                        | <input checked="" type="checkbox"/> | <input type="checkbox"/>            | <del>296-</del><br><del>304</del> 303-311 |
| <b>DATA</b>                               |     |                                                                                                                                                                                                                                             |                                     |                                     |                                           |
| <b>Synthesis</b>                          | 15a | Describe criteria under which study data will be quantitatively synthesized                                                                                                                                                                 | <input type="checkbox"/>            | <input checked="" type="checkbox"/> | N/A                                       |
|                                           | 15b | If data are appropriate for quantitative synthesis, describe planned summary measures, methods of handling data, and methods of combining data from studies, including any planned exploration of consistency (e.g., $I^2$ , Kendall's tau) | <input type="checkbox"/>            | <input checked="" type="checkbox"/> | N/A                                       |
|                                           | 15c | Describe any proposed additional analyses (e.g., sensitivity or subgroup analyses, meta-regression)                                                                                                                                         | <input type="checkbox"/>            | <input checked="" type="checkbox"/> | N/A                                       |
|                                           | 15d | If quantitative synthesis is not appropriate, describe the type of summary planned                                                                                                                                                          | <input checked="" type="checkbox"/> | <input type="checkbox"/>            | <del>318-325-</del><br><del>332</del>     |
| <b>Meta-bias(es)</b>                      | 16  | Specify any planned assessment of meta-bias(es) (e.g., publication bias across studies, selective reporting within studies)                                                                                                                 | <input type="checkbox"/>            | <input checked="" type="checkbox"/> | N/A                                       |
| <b>Confidence in cumulative evidence</b>  | 17  | Describe how the strength of the body of evidence will be assessed (e.g., GRADE)                                                                                                                                                            | <input checked="" type="checkbox"/> | <input type="checkbox"/>            | <del>326-</del><br><del>334</del> 333-341 |



# BMJ Open

## The experiences of stroke patients and rehabilitation professionals with upper limb rehabilitation robots: a qualitative systematic review protocol

|                                 |                                                                                                                                                                                                                                                                                                                                                                                                         |
|---------------------------------|---------------------------------------------------------------------------------------------------------------------------------------------------------------------------------------------------------------------------------------------------------------------------------------------------------------------------------------------------------------------------------------------------------|
| Journal:                        | <i>BMJ Open</i>                                                                                                                                                                                                                                                                                                                                                                                         |
| Manuscript ID                   | bmjopen-2022-065177.R2                                                                                                                                                                                                                                                                                                                                                                                  |
| Article Type:                   | Protocol                                                                                                                                                                                                                                                                                                                                                                                                |
| Date Submitted by the Author:   | 02-Sep-2022                                                                                                                                                                                                                                                                                                                                                                                             |
| Complete List of Authors:       | Chockalingam, Manigandan; National University of Ireland Galway, Occupational Therapy<br>Vasanthan, Lenny; Christian Medical College Vellore, Physiotherapy, Physical Medicine and Rehabilitation<br>Balasubramanian, Sivakumar ; Christian Medical College Vellore, Bioengineering<br>Sriram, Vimal; University Hospitals Bristol and Weston NHS Foundation Trust, Head of Allied Health Professionals |
| <b>Primary Subject Heading</b>: | Qualitative research                                                                                                                                                                                                                                                                                                                                                                                    |
| Secondary Subject Heading:      | Neurology, Qualitative research, Rehabilitation medicine                                                                                                                                                                                                                                                                                                                                                |
| Keywords:                       | Stroke < NEUROLOGY, REHABILITATION MEDICINE, QUALITATIVE RESEARCH                                                                                                                                                                                                                                                                                                                                       |
|                                 |                                                                                                                                                                                                                                                                                                                                                                                                         |

SCHOLARONE™  
Manuscripts

1  
2  
3  
4  
5  
6  
7  
8  
9  
10  
11  
12  
13  
14  
15  
16  
17  
18  
19  
20  
21  
22  
23  
24  
25  
26  
27  
28  
29  
30  
31  
32  
33  
34  
35  
36  
37  
38  
39  
40  
41  
42  
43  
44  
45  
46  
47  
48  
49  
50  
51  
52  
53  
54  
55  
56  
57  
58  
59  
60  
**TITLE PAGE****1**  
**2 Title of the article:**

3 The experiences of stroke patients and rehabilitation professionals with upper limb  
4 rehabilitation robots: a qualitative systematic review protocol

**5 Authors**

6 Manigandan Chockalingam

7 Lecturer in Occupational Therapy

8 School of Health Sciences

9 R.No. 213 Moyola Building

10 National University of Ireland Galway

11 Galway

12 Ireland

13 Email: [Manigandan.Chockalingam@nuigalway.ie](mailto:Manigandan.Chockalingam@nuigalway.ie); [manigandan93@yahoo.com](mailto:manigandan93@yahoo.com)

14 Lenny Vasanthan

15 Reader in Physiotherapy

16 Christian Medical College, Vellore

17 Vellore – 632004

18 India

19 Email: [lennyv@cmcvellore.ac.in](mailto:lennyv@cmcvellore.ac.in)

20 Sivakumar Balasubramanian

21 Professor and Head of Bioengineering

22 Christian Medical College

1  
2  
3 23 Bagayam  
4  
5  
6 24 Vellore – 632002  
7  
8  
9 25 India  
10  
11  
12 26 Email: [siva82kb@cmcvellore.ac.in](mailto:siva82kb@cmcvellore.ac.in)  
13  
14  
15  
16 27 Vimal Sriram  
17  
18 28 Head of Allied Health Professionals  
19  
20 29 University Hospitals Bristol and Weston NHS Foundation Trust  
21  
22  
23 30 Trust HQ  
24  
25 31 Marlborough Hill  
26  
27  
28 32 Bristol, BS1 3NU  
29  
30 33 Email: [vimal.sriram@uhbw.nhs.uk](mailto:vimal.sriram@uhbw.nhs.uk)  
31  
32  
33  
34 **Corresponding Author:**  
35  
36 35 Lenny Vasanthan  
37  
38 36 Reader in Physiotherapy  
39  
40 37 Christian Medical College, Vellore  
41  
42 38 Ida Scudder Road  
43  
44 39 Vellore 632 004  
45  
46 40 Tamil Nadu  
47  
48 41 India  
49  
50 42 Email: [lennyv@cmcvellore.ac.in](mailto:lennyv@cmcvellore.ac.in)  
51  
52  
53  
54  
55  
56  
57 **Word Count**  
58  
59 44 Abstract – 297  
60

1  
2  
3  
4  
5  
6  
7  
8  
9  
10  
11  
12  
13  
14  
15  
16  
17  
18  
19  
20  
21  
22  
23  
24  
25  
26  
27  
28  
29  
30  
31  
32  
33  
34  
35  
36  
37  
38  
39  
40  
41  
42  
43  
44  
45  
46  
47  
48  
49  
50  
51  
52  
53  
54  
55  
56  
57  
58  
59  
60

45 Manuscript – 3664

46 **Acknowledgements**

47 We thank Ms Rachel Rajasekaran, Ms Dolly Mira Priyadarshini, and Ms Jackie Fox for  
48 proofreading our manuscript and for valuable English language editing.

For peer review only

1  
2  
3 49 **The experiences of stroke patients and rehabilitation professionals with**  
4  
5  
6 50 **upper limb rehabilitation robots: a qualitative systematic review protocol**  
7  
8  
9

10 51 **ABSTRACT**  
11  
12

13 52 **Introduction:** Emerging evidence suggests that robotic devices for upper limb rehabilitation  
14  
15 53 after a stroke may improve upper limb function. For robotic upper limb rehabilitation in  
16  
17 54 stroke to be successful, patients' experiences and those of the rehabilitation professionals  
18  
19 55 must be considered. Therefore, this review aims to synthesise the available evidence on  
20  
21 56 experiences of patients after a stroke with rehabilitation robots for upper limb rehabilitation  
22  
23 57 and the experiences of rehabilitation professionals with rehabilitation robots for upper limb  
24  
25 58 stroke rehabilitation.  
26  
27  
28  
29  
30

31 59 **Methods and Analysis:** Database search will include MEDLINE(Ovid), EMBASE(Elsevier),  
32  
33 60 Cochrane CENTRAL, PsycINFO, Scopus, Web of Science, IEEE and CINAHL(EBSCOhost). Grey  
34  
35 61 literature from Open Grey, PsyArXiv, bioRxiv, medRxiv, and Google Scholar, will also be  
36  
37 62 searched. Qualitative studies or results from mixed-method studies that include adult  
38  
39 63 patients after a stroke who use upper limb rehabilitation robots, either supervised by  
40  
41 64 rehabilitation professionals or by patients themselves, at any stage of their rehabilitation  
42  
43 65 and/or stroke professionals who use upper limb rehabilitation robots will be included.  
44  
45 66 Robotic upper limb rehabilitation provided by students, healthcare assistants, technicians,  
46  
47 67 non-professional caregivers, family caregivers, volunteer caregivers, or other informal  
48  
49 68 caregivers will be excluded. Articles published in English will be considered regardless of  
50  
51 69 date of publication. Studies will be screened and critically appraised for methodological  
52  
53 70 quality by two independent reviewers. A standardised tool from JBI SUMARI for data  
54  
55  
56  
57  
58  
59  
60

1  
2  
3 71 extraction, the meta-aggregation approach for data synthesis, and the ConQual approach  
4  
5  
6 72 for confidence evaluation will be followed.  
7  
8

9 73 **Ethics and Dissemination:** As this systematic review is based on previously published  
10  
11 74 research, no informed consent or ethical approval is required. It is anticipated that this  
12  
13  
14 75 systematic review will highlight the experiences of patients after a stroke and perceived  
15  
16 76 facilitators and barriers for rehabilitation professionals on this topic, which will be  
17  
18  
19 77 disseminated through peer-reviewed publications and national and international  
20  
21 78 conferences.  
22  
23

24  
25 79 **Systematic review registration number:** PROSPERO-CRD42022321402  
26  
27

28 80 **Keywords:** robotics; stroke; rehabilitation; experience; health personnel  
29  
30  
31

32 81 **Abstract word count:** 297  
33  
34  
35  
36  
37  
38  
39  
40  
41  
42  
43  
44  
45  
46  
47  
48  
49  
50  
51  
52  
53  
54  
55  
56  
57  
58  
59  
60

1  
2  
3 **82 ARTICLE SUMMARY**  
4  
5  
6

7 **83 STRENGTHS AND LIMITATIONS OF THIS STUDY**  
8  
9

- 10 84 1. This review will include literature from inter-disciplinary databases to maximise  
11  
12  
13 85 diversity of data.  
14  
15 86 2. Inclusion of grey literature in this review will provide comprehensive information of  
16  
17  
18 87 experiences in the use of upper limb rehabilitation robots that are not commercially  
19  
20 88 available.  
21  
22  
23 89 3. Use of ConQual approach will ensure confidence in the synthesised findings of this  
24  
25 90 review.  
26  
27  
28 91 4. This review will include only English-language publications due to limited financial  
29  
30 92 resources, which will limit the review's comprehensiveness.  
31  
32  
33  
34  
35  
36  
37  
38  
39  
40  
41  
42  
43  
44  
45  
46  
47  
48  
49  
50  
51  
52  
53  
54  
55  
56  
57  
58  
59  
60

## 93 INTRODUCTION

94 The use of rehabilitation robots has grown over the past few decades,[1] particularly for  
95 upper limb stroke rehabilitation, and the evidence supporting their use is also  
96 increasing.[2,3] Several rehabilitation robots are available to assess and augment  
97 rehabilitation of stroke-impaired upper limbs under direct or remote supervision, including  
98 end-effectors,[4,5] (Figure 1 and Figure 2) exoskeletons,[6] (Figure 3) and exosuits.[7]  
99 (Figure 4) The use of rehabilitation robots produces comparable results,[8] and in some  
100 cases, such as when used by individuals with upper extremity hemiplegia, who have limited  
101 chances of spontaneous recovery after stroke, they could produce better results than those  
102 achieved by other routine therapy methods.[2,3] In addition, systematic reviews of  
103 rehabilitation robots in upper limb stroke rehabilitation have demonstrated that they  
104 provide valid outcome measurements of clinically meaningful body functions and structures  
105 of the ICF domain, such as muscle viscoelasticity[9] and movement-related kinematic  
106 parameters.[10] For these reasons, rehabilitation robots are receiving increasing attention  
107 in rehabilitation programs as intervention devices and tools for evaluating clinical outcomes.  
108 Although rehabilitation robots have not been extensively examined for their adoption in  
109 routine care, the increasing number of robots being commercialised over the past decade  
110 and the increased number of robotic literature suggests a slow and steady adoption.[11]  
111 There is some emerging evidence that rehabilitation robots may improve upper limb  
112 function after a stroke.[1-3] Studies have compared different types of robots in concluding  
113 effectiveness of upper limb function,[8,12] which may explain the varying results between  
114 studies that support or negate the effectiveness of upper limb robotic rehabilitation.  
115 Mehrholz et al., for example, reported that there is no difference between the types of



1  
2  
3 116 robots and the improvements in upper limb functional performance in their meta-analysis  
4  
5  
6 117 of robot-assisted upper limb training in patients after a stroke.[8] In contrast, the meta-  
7  
8 118 analysis by Mogio et al. found that exoskeleton robots are significantly superior to end-  
9  
10 119 effector robots in improving finger and hand motor function in patients after a stroke.[12] It  
11  
12  
13 120 should be noted that the use of Exosuits in rehabilitation is a relatively new approach in  
14  
15 121 rehabilitation robotics, and no comparison studies have been completed to date.[7,13,14]  
16  
17  
18  
19 122 Due to the variety of robots available that provide similar clinical outcomes, selecting an  
20  
21 123 appropriate robotic intervention strategy for patients after a stroke by rehabilitation  
22  
23 124 professionals may be complex and challenging.[8] Thus, the subjective experiences of  
24  
25 125 rehabilitation professionals with robots become crucial in the selection and use of  
26  
27 126 rehabilitation robots in clinical practice. It is also pertinent to study rehabilitation  
28  
29 127 professionals' experiences with and attitudes towards using rehabilitation robots in clinical  
30  
31 128 practice since they remain cautious when recommending them.[15,16] The literature also  
32  
33 129 acknowledges this need, pointing out that rehabilitation professionals' attitudes are as  
34  
35 130 important as the benefits derived from robots.[15,16] If upper limb rehabilitation robots are  
36  
37 131 to be successfully incorporated into clinical practice, there is a need for a systematic  
38  
39 132 approach to the adoption of such robots in rehabilitation.[15,16] Therefore, it is necessary  
40  
41 133 to systematically review, document, and compile rehabilitation professionals' perspectives,  
42  
43 134 experiences, and views on upper limb rehabilitation robots.  
44  
45  
46  
47  
48  
49  
50  
51 135 Renaud and Van Biljon assert that a person's adoption of technology begins when they  
52  
53 136 become aware of it and ends when they accept and fully utilise it.[17] The perceptions,  
54  
55 137 perspectives, satisfaction and other experiences of an end user play a significant role in  
56  
57 138 determining whether that end user will successfully adopt the technology and whether the  
58  
59  
60

1  
2  
3 139 technology will continue to be used or discontinued.[18] Thus, the experiences of patients  
4  
5 140 who use rehabilitation robots after a stroke are as significant as those of rehabilitation  
6  
7 141 professionals. The experiences of patients with rehabilitation robots may differ from those  
8  
9 142 of rehabilitation professionals, and therefore, these experiences should be analysed and  
10  
11 143 reported separately. After a stroke, patients tend to prioritise their personal needs and  
12  
13 144 participation in meaningful activities over that of impairment-focused rehabilitation.[19] It  
14  
15 145 is, therefore, imperative to conduct a comprehensive review of patient experiences related  
16  
17 146 to the use of rehabilitation robots, which may lead to an increase in the acceptance and  
18  
19 147 sustained use of these devices by informing improved user-centred designs. Further, a  
20  
21 148 comprehensive summary of patients' likes, dislikes, and preferences for specific upper limb  
22  
23 149 rehabilitation robots is fundamental when outcomes among the types of robots are largely  
24  
25 150 similar.[8]

26  
27  
28  
29  
30  
31  
32  
33 151 The only systematic review to date that aimed to meta-synthesise end-user perceptions of  
34  
35 152 robotics is in motor rehabilitation[20] and provides an early, generic description of the  
36  
37 153 patients', caregivers', and professionals' experiences with rehabilitation robots. In the  
38  
39 154 review by Lapidou et al., an overview of all types of motor rehabilitation using  
40  
41 155 rehabilitation robots for various clinical conditions (shoulder instability/rotator cuff injury,  
42  
43 156 spinal cord injury, stroke, brain injury, cerebral palsy, and unspecified clinical conditions) of  
44  
45 157 all ages (from five to 84 years of age) is provided.[20] This review's inclusion of participants  
46  
47 158 with varied clinical presentations offers valuable insight into their generalised experiences  
48  
49 159 with rehabilitation robots. However, as the review focuses on a broad clinical group, it fails  
50  
51 160 to provide a comprehensive focus and in-depth description of rehabilitation robots' use in  
52  
53 161 adult patients with stroke. Stroke upper limb rehabilitation robots for adults require  
54  
55  
56  
57  
58  
59  
60

1  
2  
3 162 particular considerations due to their unique needs,[21] abilities,[22] and patterns of  
4  
5  
6 163 functional recovery[23] that are distinct from those of other patient populations, such as  
7  
8 164 spinal cord injury[24,25] or children with cerebral palsy.[26] This work addresses the lack of  
9  
10  
11 165 an in-depth focus on patients with stroke to fill the gap in the literature that so far has  
12  
13 166 predominantly looked at multiple clinical conditions.

16  
17 167 A preliminary search of PROSPERO, MEDLINE, Cochrane Database of Systematic Reviews,  
18  
19 168 and JBI Evidence Synthesis was conducted on 01 March 2022. During the search, no scoping  
20  
21 169 or systematic reviews were identified that focused on the experiences of the use of upper  
22  
23  
24 170 limb rehabilitation robots by stroke patients or their rehabilitation professionals, indicating  
25  
26 171 the necessity for a qualitative systematic review to further explore this.

## 30 172 **METHODS AND ANALYSIS**

### 32 173 **Objective**

36 174 This review aims to collect and synthesise available evidence regarding the experiences of  
37  
38 175 patients after a stroke using robots for upper limb rehabilitation, irrespective of the ongoing  
39  
40  
41 176 involvement of rehabilitation professionals and the experiences of rehabilitation  
42  
43 177 professionals using robots for upper limb stroke rehabilitation.

### 47 178 **Review questions**

- 51 179 1. What are the experiences of patients after a stroke when undergoing rehabilitation  
52  
53 180 for upper limb dysfunction using rehabilitation robots?

1  
2  
3 181 2. What are the rehabilitation professionals' experiences, perspectives, opinions, and  
4  
5  
6 182 perceived facilitators and barriers regarding the use of rehabilitation robots for  
7  
8 183 upper limb stroke rehabilitation?  
9

10  
11  
12 184 **Eligibility criteria**

13  
14 185 **Participants**

15  
16  
17  
18 186 This review will consider studies that include adult patients (over the age of 18) after a  
19  
20 187 stroke using rehabilitation robots for upper limb rehabilitation, either supervised by  
21  
22  
23 188 rehabilitation professionals or by patients themselves, as part of self-administered robotic  
24  
25 189 therapy at any phase of their rehabilitation.  
26

27  
28  
29 190 To clarify our inclusion criteria, we have used the following definitions:  
30

31  
32 191 *Stroke* – a sudden loss of neurological function caused by haemorrhage or ischemia in the  
33  
34  
35 192 brain parenchyma caused by a vascular event, with symptoms lasting more than 24 hours,  
36  
37 193 which are not explainable by other causes.  
38

39  
40  
41 194 *Phases of rehabilitation* – time after stroke as classified by the Stroke Roundtable

42  
43 195 Consortium;<sup>[27]</sup> namely, the hyperacute phase (< 24 hours), the acute phase (2-7 days), the  
44  
45  
46 196 early subacute phase (8-90 days), late subacute phase (91-180 days) and chronic phase  
47  
48 197 (>180 days).  
49

50  
51  
52 198 *Upper limb rehabilitation* – interventions aimed at enhancing the function of the upper limb  
53  
54 199 after considering the goals of patients after a stroke, which are identified following  
55  
56  
57 200 evaluations of their functional abilities and level of activity.  
58  
59  
60

1  
2  
3 201 *Rehabilitation robots* – robots that have contact with a patient to provide physical  
4  
5  
6 202 interaction driven by an actuation system and controlled by the robot alone or in a robot  
7  
8 203 and patient shared control to perform rehabilitation, assessment, compensation, or  
9  
10 204 alleviation.[28] Rehabilitation robots may be fixed, mobile, or wearable devices used during  
11  
12  
13 205 inpatient, outpatient, home-based, or community-based rehabilitation. These rehabilitation  
14  
15 206 robots may take the forms of end-effectors, exoskeletons, or exosuits.

17  
18  
19 207 *End-effectors* – robots with a single point of connection to a patient's distal segment, with  
20  
21 208 joints that are neither matched to nor aligned with other joints of the patient, where the  
22  
23  
24 209 force generated by the robot's distal interface is transmitted to other joints of the patient in  
25  
26 210 accordance with the principles of close-kinematic chains.[29] (Figure 1 and Figure 2)

27  
28  
29  
30 211 *Exoskeletons* – robots with rigid anthropomorphic structures attached to the body at  
31  
32 212 multiple points through straps, cuffs, belts, or other attachments, ensuring the robotic joint  
33  
34 213 axes are aligned with the anatomical joints of the wearer's body.[29] (Figure 3)

35  
36  
37  
38 214 *Exosuits* – robots that use softer materials such as fabric instead of rigid anthropomorphic  
39  
40 215 structures.[29] (Figure 4)

41  
42  
43  
44 216 *Upper limb robotic rehabilitation* – robots assisting or resisting movement in a single joint or  
45  
46 217 controlling the intersegmental coordination of the affected upper limb as well as providing  
47  
48 218 and enhancing repetitive task training and task-specific training to improve range of motion,  
49  
50 219 strength, motor learning, and motor control.[8,29] In addition to assessing, compensating  
51  
52 220 for, or alleviating the effects of stroke-related upper limb impairment.  
53  
54  
55  
56  
57  
58  
59  
60

1  
2  
3 221 Studies that report patients with more than one stroke, patients under 18, or patients with  
4  
5 222 other known causes of upper limb impairment besides stroke will be excluded. Studies  
6  
7 223 reporting patients without upper limb motor dysfunction or having sensory impairments  
8  
9 224 alone or cognitive and perceptual impairments alone will be excluded. Hospital robots,  
10  
11 225 social robots, or care/assistive robots that assist patients after a stroke in their activities of  
12  
13 226 daily living without being connected to their upper limb or robotic interventions other than  
14  
15 227 rehabilitation robots, as previously described, will be excluded. Studies reporting upper limb  
16  
17 228 rehabilitation using rehabilitation robots in body segments other than the affected upper  
18  
19 229 limb will be excluded. Likewise, studies reporting upper limb robotic interventions  
20  
21 230 conducted concurrently with other robotic interventions for other body segments,  
22  
23 231 presented as a whole and not sufficiently distinguished from one another, will be excluded.  
24  
25  
26  
27  
28  
29  
30  
31 232 This review will include professionals who provide stroke upper limb rehabilitation using  
32  
33 233 rehabilitation robots. The rehabilitation professionals may be experts in upper limb  
34  
35 234 rehabilitation, such as physiatrists, physical therapists, occupational therapists, hand  
36  
37 235 therapists, or rehabilitation nurses. Other professionals such as emergency physicians,  
38  
39 236 geriatricians, neurologists, neurosurgeons, or other physicians involved only in the medical  
40  
41 237 or surgical management of patients with stroke who do not provide active upper limb  
42  
43 238 rehabilitation will be excluded. Similarly, rehabilitation engineers, robotic engineers,  
44  
45 239 biomedical engineers, orthotists, and other specialists who are typically not directly involved  
46  
47 240 in physical rehabilitation or clinical care for stroke patients will also be excluded. Robotic  
48  
49 241 upper limb rehabilitation provided by students, healthcare assistants, or technicians, who  
50  
51 242 may not be competent to practice independently, will be excluded. Likewise, robotic upper  
52  
53  
54  
55  
56  
57  
58  
59  
60

1  
2  
3 243 limb rehabilitation provided by non-professional caregivers, family caregivers, volunteer  
4  
5  
6 244 caregivers, or other informal caregivers will also be excluded.  
7  
8

9 245 Phenomena of interest  
10  
11  
12

13 246 In this review, studies that describe the experiences of patients after a stroke and/or their  
14  
15 247 rehabilitation professional with upper limb rehabilitation robots will be considered. Patients'  
16  
17 248 experiences during or after the use of upper limb rehabilitation robots for stroke can be  
18  
19  
20 249 positive or negative, describe complications/adverse events or any other experiences.  
21  
22 250 Rehabilitation professionals' experiences may include facilitators and barriers, encounters,  
23  
24  
25 251 perspectives, or opinions associated with preparing for or providing upper limb  
26  
27 252 rehabilitation in stroke using rehabilitation robots.  
28  
29  
30

31 253 Context  
32  
33  
34

35 254 The context will not be restricted in this review. This review will consider studies that  
36  
37 255 present patients after a stroke or rehabilitation professionals' experiences of providing  
38  
39 256 upper limb rehabilitation using rehabilitation robots in any clinical setting during any phase  
40  
41  
42 257 of stroke rehabilitation. These settings may include outpatient, inpatient, community-based,  
43  
44 258 or home-based intervention services or other therapeutic settings. This review is not  
45  
46  
47 259 restricted to geographical locations, funding mechanisms, healthcare facilities, or services.  
48  
49  
50

51 260 Types of studies  
52  
53

54 261 This review will consider studies that focus on qualitative data, including, but not limited to,  
55  
56 262 designs such as qualitative descriptive, phenomenology, grounded theory, ethnography, and  
57  
58  
59  
60

1  
2  
3 263 action research. This review will also consider the qualitative results of mixed-method  
4  
5  
6 264 studies.

7  
8  
9 265 **Methods**

10  
11  
12  
13 266 The proposed systematic review will be conducted in accordance with the JBI methodology  
14  
15 267 for systematic reviews of qualitative evidence.[30] The review will commence in October  
16  
17  
18 268 2022 and end in September 2023. The review protocol is registered in PROSPERO  
19  
20 269 (CRD42022321402).

21  
22  
23  
24 270 **Search strategy**

25  
26  
27 271 The search strategy will aim to locate both published and unpublished studies. A three-step  
28  
29  
30 272 search strategy will be utilised in this review. First, a pilot initial limited search of MEDLINE  
31  
32 273 (Ovid) and CINAHL (EBSCOhost) was undertaken to identify articles on the topic. The text  
33  
34 274 words contained in the titles and abstracts of relevant articles and the index terms (such as  
35  
36  
37 275 MeSH terms) used to describe the articles were used to develop a full search strategy for  
38  
39  
40 276 MEDLINE (Ovid) (see Appendix 1). The search strategy, including all identified keywords and  
41  
42 277 index terms, will be adapted for each included database and/or information source. The  
43  
44 278 reference lists of all included sources of evidence will be screened for additional studies.

45  
46  
47  
48 279 Regardless of the publication date, articles published in English will be included to capture  
49  
50 280 all relevant literature comprehensively. In view of the limited resources available to  
51  
52  
53 281 reviewers to translate literature from other languages, languages other than English will be  
54  
55 282 excluded in this review. The databases will include MEDLINE(Ovid), EMBASE(Elsevier),  
56  
57  
58 283 Cochrane CENTRAL, PsycINFO, Scopus, Web of Science, IEEE and CINAHL(EBSCOhost). Grey  
59  
60



1  
2  
3 284 literature will also be searched through Open Grey, PsyArXiv, bioRxiv, medRxiv, and Google  
4  
5  
6 285 Scholar.

7  
8  
9 286 **Study selection**

10  
11  
12 287 After the search, the citations will be collated and uploaded into EndNote X20 (Clarivate  
13  
14 288 Analytics, PA, USA), and duplicates will be removed. After piloting the eligibility criteria on a  
15  
16 289 sample of citations (between six and eight articles) to ensure consistency in application,[31]  
17  
18 290 two independent reviewers (MC and LV) will screen all titles and abstracts to determine if  
19  
20 291 they meet the review's inclusion criteria and any disagreements will be resolved by mutual  
21  
22 292 agreement in discussion with the third reviewer (VS/SB). Potentially relevant studies will be  
23  
24 293 retrieved in full, and their citation details imported into the JBI System for the Unified  
25  
26 294 Management, Assessment and Review of Information (JBI SUMARI) (JBI, Adelaide,  
27  
28 295 Australia).[32] The full text of selected citations will be assessed in detail against the  
29  
30 296 inclusion criteria by two independent reviewers (MC and LV), and any disagreements will be  
31  
32 297 resolved in discussion with VS/SB. The reasons for the exclusion of full-text papers that do  
33  
34 298 not meet the inclusion criteria will be recorded and reported. The results of the search and  
35  
36 299 the study inclusion process will be reported in full in the final systematic review and  
37  
38 300 presented using a Preferred Reporting Items for Systematic Reviews and Meta-analyses  
39  
40 301 (PRISMA) flow diagram.[33]

41  
42  
43  
44  
45  
46  
47  
48  
49  
50 302 **Assessment of methodological quality**

51  
52  
53  
54 303 Eligible studies will be critically appraised by two independent reviewers for methodological  
55  
56 304 quality using the standard JBI Critical Appraisal Checklist for Qualitative Research.[34] Any  
57  
58 305 disagreements that arise between the reviewers will be resolved through discussion with  
59  
60

1  
2  
3 306 the third reviewer. The results of the critical appraisal will be reported in narrative form and  
4  
5 307 tables. Regardless of the results of their methodological quality, all studies will be included  
6  
7  
8 308 in the data extraction and synthesis process to ensure that all experiences are captured  
9  
10 309 comprehensively and no evidence is missed. All major quality issues of the included studies  
11  
12  
13 310 will be presented and discussed in the final review report.  
14  
15

### 16 311 **Data extraction**

17  
18  
19  
20 312 Data will be extracted from studies included in the review by two independent reviewers  
21  
22 313 using the standardised JBI data extraction tool in JBI SUMARI.[32] The data extracted will  
23  
24 314 include specific details about the population, context, culture, geographical location, study  
25  
26 315 methods, and the phenomena of interest relevant to the review objectives, namely  
27  
28 316 experiences of using upper limb rehabilitation robots by patients after a stroke and  
29  
30 317 rehabilitation professionals' experiences of providing stroke upper limb rehabilitation using  
31  
32 318 robots. The findings, and their illustrations, will be extracted verbatim and assigned a level  
33  
34 319 of credibility. Any disagreements that arise between the reviewers will be resolved through  
35  
36 320 discussion with the third reviewer. If necessary, missing or additional data will be requested  
37  
38 321 from the authors. Even after obtaining additional information from the authors, all missing  
39  
40 322 or unclear information that continues to exist will be treated in the review report as missing  
41  
42 323 data.  
43  
44  
45  
46  
47  
48  
49

### 50 324 **Data synthesis**

51  
52  
53  
54 325 Qualitative research findings where possible, will be pooled using JBI SUMARI with the  
55  
56 326 meta-aggregation approach.[35] This will involve the aggregation or synthesis of findings to  
57  
58 327 generate a set of statements representing that aggregation by assembling the findings and  
59  
60

1  
2  
3 328 categorising these findings based on similarity in meaning. These categories will then be  
4  
5  
6 329 subjected to a synthesis to produce a single comprehensive set of synthesised findings that  
7  
8 330 can be used as a basis for evidence-based practice. Where textual pooling is not possible,  
9  
10 331 the findings will be presented in a narrative form.

### 14 332 **Assessing confidence in the findings**

17 333 The final synthesised findings will be graded according to the ConQual approach for  
18 334 establishing confidence in the output of qualitative research synthesis and presented in a  
19  
20 335 Summary of Findings.[36] The Summary of Findings includes the major elements of the  
21  
22  
23 336 review and details how the ConQual score is developed. The title, population, phenomena  
24  
25  
26  
27 337 of interest, and context for the specific review will be included in the summary of findings.  
28  
29  
30 338 Each synthesised finding from the review will then be presented, along with the type of  
31  
32 339 research informing it, the score for dependability and credibility, and the overall ConQual  
33  
34  
35 340 score.

### 38 341 **Reflexivity and integrity**

41  
42 342 Given that this is a review of qualitative studies, it is important to consider the reviewers'  
43  
44 343 assumptions and preconceptions regarding the phenomenon of interest, as well as other  
45  
46  
47 344 potential influences that may affect the review process.

49  
50 345 This review will be conducted in collaboration. The current review is not funded by public or  
51  
52 346 private sources, and the review team have declared no conflict of interest. As a result, the  
53  
54  
55 347 review is not affected by external influences. The review team includes a robotic engineer,  
56  
57  
58 348 an occupational therapist with experience in using rehabilitation robots, an occupational  
59  
60

1  
2  
3 349 therapist, and a physiotherapist with experience in rehabilitation but not robotics. With the  
4  
5  
6 350 deliberate decision to include reviewers with varying levels of experience with rehabilitation  
7  
8 351 robots and their involvement in all stages of the review process, it is anticipated that any  
9  
10 352 potential influence of individual reviewers' conceptions and preconceptions regarding the  
11  
12  
13 353 phenomenon of interest will be minimised. The review team's experience will provide the  
14  
15 354 necessary expertise for this review.

16  
17  
18  
19 355 A conscious effort will be made to write memos during the data collection and analysis in  
20  
21 356 order to examine and reflect on the reviewer's engagement.[37] This 'memoing' process will  
22  
23  
24 357 include methodological notetaking to explain the procedural aspect and observational  
25  
26 358 comments to explain and explore the reviewer's feelings at different stages of the review  
27  
28  
29 359 process. Moreover, the reviewers have not published a primary qualitative study on the  
30  
31 360 phenomenon of interest, despite having published primary qualitative studies on other  
32  
33  
34 361 topics. The use of the standardised JBI extraction tool for data extraction and following the  
35  
36 362 standard procedures of the meta-aggregation approach for data synthesis, as well as the  
37  
38  
39 363 above-mentioned process of author reflexivity, based on Flemming and Noyes  
40  
41 364 descriptions,[37] are likely to minimise the impact of the review team's preconceptions.  
42  
43  
44 365 Reflexivity and integrity will be maintained throughout the search, data collection and  
45  
46 366 analysis stages.

#### 47 48 49 367 **Patient and public involvement**

50  
51  
52  
53 368 Patients and members of the public were not involved in the planning of this protocol.  
54  
55

#### 56 57 369 **DISCUSSION** 58 59 60

1  
2  
3 370 The main aim of this review is to describe the experiences of patients after a stroke and  
4  
5  
6 371 rehabilitation professionals' experiences with upper limb rehabilitation robots. The results  
7  
8 372 from this review are expected to inform better understanding of the use of upper limb  
9  
10 373 rehabilitation robots, perceptions, opinions, facilitators, and barriers to their use. This  
11  
12 374 review will highlight current research and available evidence in this important and emerging  
13  
14 375 topic area in upper limb rehabilitation after a stroke. The findings from this review will be  
15  
16 376 published and disseminated in journals, conferences and social media, and it is anticipated  
17  
18 377 that the findings from this review will be useful for patients after a stroke, rehabilitation  
19  
20 378 professionals, commissioners of health and care services and developers of rehabilitation  
21  
22 379 robots to inform better provision and ongoing care for patients after a stroke.  
23  
24  
25  
26  
27  
28

29 380 **FIGURE LEGENDS:**

30  
31  
32 381 **Figure 1** illustrates an example of upper limb training using an end-effector robot, H-man.

33  
34  
35 382 \*Note: The person shown in the picture is not a patient and was taken with the participant's  
36  
37 383 knowledge and permission. Picture courtesy of Articares.  
38  
39

40  
41 384 **Figure 2** illustrates an example of upper limb training using an end-effector robot,

42  
43 385 MO.TO.RE. \*Note: The person shown in the picture is not a patient and was taken with the  
44  
45 386 participant's knowledge and permission. Picture courtesy of Humanware S.r.l.  
46  
47

48  
49 387 **Figure 3** illustrates an example of upper limb training using an exoskeleton robot,

50  
51 388 ArmeoPower. \*Note: The person shown in the picture is not a patient and was taken with  
52  
53 389 the participant's knowledge and permission. Picture courtesy of Hocoma.  
54  
55  
56  
57  
58  
59  
60

1  
2  
3 390 **Figure 4** illustrates an example of an upper limb exosuit robot described by Hoang et al.  
4  
5  
6 391 being worn by a volunteer. \*Note: The person shown in the picture is not a patient and was  
7  
8 392 taken with the participant's knowledge and permission. Picture courtesy of Dr Thanh Nho  
9  
10 393 Do.

11  
12  
13  
14 394 **ABBREVIATIONS:**

15  
16  
17 395 CINAHL: Cumulative Index of Nursing and Allied Health Literature

18 396 PRISMA: Preferred Reporting Items for Systematic Reviews and Meta-Analyses

19  
20 397 PROSPERO: International Prospective Register of Systematic Reviews

21  
22  
23 398 JBI SUMARI: JBI System for the Unified Management, Assessment and Review of  
24  
25  
26 399 Information

27  
28  
29  
30  
31 400 **AUTHOR CONTRIBUTIONS:**

32  
33  
34 401 MC was responsible for the conceptualisation and design of the study with critical inputs  
35  
36 402 from LV, VS, and SB. MC developed the search strategy and conducted the search with  
37  
38 403 critical input from LV, VS, and SB. The protocol was drafted by MC with important  
39  
40 404 intellectual input and revisions from LV, VS, and SB. All authors have read and given  
41  
42 405 approval for this version and agree to be accountable for all aspects of the work. MC is the  
43  
44 406 guarantor of the review.

45  
46  
47  
48  
49  
50 407 **FUNDING STATEMENT:**

51  
52  
53  
54 408 This research received no specific grant from any funding agency in the public, commercial  
55  
56 409 or not-for-profit sectors.  
57  
58  
59  
60

1  
2  
3 410 **CONFLICT OF INTERESTS STATEMENT:**  
4  
5

6  
7 411 The authors declare that there are no competing interests or conflicting interests.  
8  
9

10 412 **DATA STATEMENT:**  
11  
12

13  
14 413 There are currently no data associated with this protocol. However, this protocol is

15  
16 414 published in PROSPERO. Details of this citation are as follows  
17

18  
19  
20 415 Manigandan Chockalingam, Lenny Vasanthan T, Sivakumar Balasubramanian, Vimal Sriram.

21  
22 416 Stroke patients and their healthcare providers' experiences of upper limb rehabilitation

23  
24 417 robotics: a qualitative systematic review protocol. PROSPERO 2022 CRD42022321402  
25

26  
27 418 Available  
28

29  
30 419 from: [https://www.crd.york.ac.uk/prospero/display\\_record.php?ID=CRD42022321402](https://www.crd.york.ac.uk/prospero/display_record.php?ID=CRD42022321402)  
31  
32

33 420 **REFERENCES**  
34  
35

36  
37 421 1. Xue X, Yang X, Deng Z, *et al.* Global Trends and Hotspots in Research on

38  
39 422 Rehabilitation Robots: A Bibliometric Analysis From 2010 to 2020. *Front Public*

40  
41 423 *Health* 2022;9:806723. doi:10.3389/fpubh.2021.806723  
42

43  
44 424 pmid:http://www.ncbi.nlm.nih.gov/pubmed/35087788  
45  
46

47  
48 425 2. Wu J, Cheng H, Zhang J, *et al.* Robot-Assisted Therapy for Upper Extremity Motor

49  
50 426 Impairment After Stroke: A Systematic Review and Meta-Analysis. *Phys Ther*

51  
52 427 2021;101(4):pzab010. doi:10.1093/ptj/pzab010  
53

54  
55 428 pmid:http://www.ncbi.nlm.nih.gov/pubmed/33454787  
56  
57  
58  
59  
60

- 1  
2  
3 429 3. Doumas I, Everard G, Dehem S, *et al.* Serious games for upper limb rehabilitation  
4  
5 after stroke: a meta-analysis. *J Neuroeng Rehabil* 2021;18(1):100.  
6 430  
7  
8 431 doi:10.1186/s12984-021-00889-1  
9  
10  
11 432 pmid:http://www.ncbi.nlm.nih.gov/pubmed/34130713  
12  
13  
14 433 4. Gandolfi M, Valè N, Dimitrova EK, *et al.* Effectiveness of Robot-Assisted Upper Limb  
15  
16 434 Training on Spasticity, Function and Muscle Activity in Chronic Stroke Patients  
17  
18 Treated With Botulinum Toxin: A Randomized Single-Blinded Controlled Trial. *Front*  
19 435  
20  
21 436 *Neurol* 2019;10:41. doi:10.3389/fneur.2019.00041  
22  
23  
24 437 pmid:http://www.ncbi.nlm.nih.gov/pubmed/30766508  
25  
26  
27 438 5. Budhota A, Chua KSG, Hussain A, *et al.* Robotic Assisted Upper Limb Training Post  
28  
29 439 Stroke: A Randomized Control Trial Using Combinatory Approach Toward Reducing  
30  
31 Workforce Demands. *Front Neurol* 2021;12:622014. doi:10.3389/fneur.2021.622014  
32 440  
33  
34 441 pmid:http://www.ncbi.nlm.nih.gov/pubmed/34149587  
35  
36  
37  
38 442 6. Calabrò RS, Naro A, Russo M, *et al.* Is two better than one? Muscle vibration plus  
39  
40 443 robotic rehabilitation to improve upper limb spasticity and function: A pilot  
41  
42 randomized controlled trial. *PLoS One* 2017;12(10):e0185936.  
43 444  
44  
45 445 doi:10.1371/journal.pone.0185936  
46  
47  
48 446 pmid:http://www.ncbi.nlm.nih.gov/pubmed/28973024  
49  
50  
51 447 7. Hoang TT, Sy L, Bussu M, *et al.* A Wearable Soft Fabric Sleeve for Upper Limb  
52  
53 448 Augmentation. *Sensors (Basel)*. 2021;21(22):7638. doi:10.3390/s21227638  
54  
55  
56 449 pmid:http://www.ncbi.nlm.nih.gov/pubmed/34833719  
57  
58  
59  
60



- 1  
2  
3 450 8. Garcia-Bernal MI, Heredia-Rizo AM, Gonzalez-Garcia P, *et al.* Validity and reliability of  
4  
5  
6 451 myotonometry for assessing muscle viscoelastic properties in patients with stroke: a  
7  
8 452 systematic review and meta-analysis. *Sci Rep* 2021;11(1):5062. doi:10.1038/s41598-  
9  
10  
11 453 021-84656-1 pmid:<http://www.ncbi.nlm.nih.gov/pubmed/33658623>  
12  
13  
14 454 9. Tran VD, Dario P, Mazzoleni S. Kinematic measures for upper limb robot-assisted  
15  
16 455 therapy following stroke and correlations with clinical outcome measures: A review.  
17  
18 456 *Med Eng Phys* 2018;53:13-31. doi:10.1016/j.medengphy.2017.12.005 Epub 2018 Feb  
19  
20  
21 457 1. pmid:<http://www.ncbi.nlm.nih.gov/pubmed/29361407>  
22  
23  
24 458 10. Mehrholz J, Pollock A, Pohl M, *et al.* Systematic review with network meta-analysis  
25  
26 459 of randomised controlled trials of robotic-assisted arm training for improving  
27  
28 460 activities of daily living and upper limb function after stroke. *J Neuroeng Rehabil*  
29  
30 461 2020;17(1):83. doi:10.1186/s12984-020-00715-0  
31  
32 462 pmid:<http://www.ncbi.nlm.nih.gov/pubmed/32605587>  
33  
34  
35 463 11. Dupont PE, Nelson BJ, Goldfarb M, Hannaford B, Menciassi A, O'Malley MK, Simaan  
36  
37 464 N, Valdastrri P, Yang GZ. A decade retrospective of medical robotics research from  
38  
39 465 2010 to 2020. *Sci Robot.* 2021 Nov 10;6(60):eabi8017. doi:  
40  
41 466 10.1126/scirobotics.abi8017. Epub 2021 Nov 10. PMID: 34757801; PMCID:  
42  
43 467 PMC8890492.  
44  
45  
46 468 12. Moggio L, de Sire A, Marotta N, *et al.* Exoskeleton versus end-effector robot-assisted  
47  
48 469 therapy for finger-hand motor recovery in stroke survivors: systematic review and  
49  
50 470 meta-analysis. *Top Stroke Rehabil* 2021:1-12. doi:10.1080/10749357.2021.1967657  
51  
52  
53 471 Epub ahead of print. pmid:<http://www.ncbi.nlm.nih.gov/pubmed/34420498>  
54  
55  
56  
57  
58  
59  
60

- 1  
2  
3 472 13. Abe T, Koizumi S, Nabae H, *et al.* Fabrication of "18 Weave" Muscles and Their  
4  
5  
6 473 Application to Soft Power Support Suit for Upper Limbs Using Thin McKibben Muscle.  
7  
8 474 *IEEE Robotics and Automation Letters* 2019;4(3):2532-8.  
9  
10 475 doi:10.1109/LRA.2019.2907433  
11  
12  
13 476 14. Xiloyannis M, Alicea R, Georgarakis AM, *et al.* Soft Robotic Suits: State of the Art,  
14  
15 477 Core Technologies, and Open Challenges. *IEEE Transactions on Robotics* 2021;1-20.  
16  
17 478 doi:10.1109/TRO.2021.3084466  
18  
19  
20 479 15. Lo K, Stephenson M, Lockwood C. Adoption of robotic stroke rehabilitation into  
21  
22 480 clinical settings: a qualitative descriptive analysis. *JBI Evid Implement*  
23  
24 481 2020;18(4):376-390. doi:10.1097/XEB.0000000000000231  
25  
26  
27 482 pmid:http://www.ncbi.nlm.nih.gov/pubmed/33570321  
28  
29  
30  
31 483 16. Jayasree-Krishnan V, Ghosh S, Palumbo A, *et al.* Developing a Framework for  
32  
33 484 Designing and Deploying Technology-Assisted Rehabilitation After Stroke: A  
34  
35 485 Qualitative Study. *Am J Phys Med Rehabil* 2021;100(8):774-779.  
36  
37 486 doi:10.1097/PHM.0000000000001634  
38  
39  
40 487 pmid:http://www.ncbi.nlm.nih.gov/pubmed/33141773  
41  
42  
43  
44 488 17. Renaud K, Van Biljon J. Predicting technology acceptance and adoption by the  
45  
46 489 elderly: a qualitative study. *ACM Int Conf Proceeding Ser* 2008;338:210-9.  
47  
48  
49 490 18. Niknejad N, Ismail W, Bahari M, *et al.* Understanding Telerehabilitation Technology  
50  
51 491 to Evaluate Stakeholders' Adoption of Telerehabilitation Services: A Systematic  
52  
53 492 Literature Review and Directions for Further Research. *Arch Phys Med Rehabil*  
54  
55 493 2021;102(7):1390-1403. doi: 10.1016/j.apmr.2020.12.014. Epub 2021 Jan 20.  
56  
57  
58 494 pmid:http://www.ncbi.nlm.nih.gov/pubmed/33484693.  
59  
60

- 1  
2  
3 495 19. Pereira CM, Greenwood N, Jones F. From recovery to regaining control of life - the  
4  
5  
6 496 perspectives of people with stroke, their carers and health professionals. *Disabil*  
7  
8 497 *Rehabil* 2021;43(20):2897-2908. doi:10.1080/09638288.2020.1722263 Epub 2020  
9  
10  
11 498 Feb 8. pmid:http://www.ncbi.nlm.nih.gov/pubmed/32036730  
12  
13  
14 499 20. Lapidou D, Curtis F, Akanuwa J, *et al.* Patient, carer, and staff perceptions of  
15  
16 500 robotics in motor rehabilitation: a systematic review and qualitative meta-synthesis.  
17  
18 501 *J Neuroeng Rehabil* 2021;18(1):181. doi:10.1186/s12984-021-00976-3  
19  
20  
21 502 pmid:http://www.ncbi.nlm.nih.gov/pubmed/34953497  
22  
23  
24 503 21. Guo Y, Zhang Z, Lin B, *et al.* The Unmet Needs of Community-Dwelling Stroke  
25  
26 504 Survivors: A Systematic Review of Qualitative Studies. *Int J Environ Res Public Health*  
27  
28 505 2021;18(4):2140. doi:10.3390/ijerph18042140  
29  
30  
31 506 pmid:http://www.ncbi.nlm.nih.gov/pubmed/33671734  
32  
33  
34 507 22. Hatem SM, Saussez G, Della Faille M, *et al.* Rehabilitation of Motor Function after  
35  
36 508 Stroke: A Multiple Systematic Review Focused on Techniques to Stimulate Upper  
37  
38 509 Extremity Recovery. *Front Hum Neurosci* 2016;10:442.  
39  
40  
41 510 doi:10.3389/fnhum.2016.00442  
42  
43  
44 511 pmid:http://www.ncbi.nlm.nih.gov/pubmed/27679565  
45  
46  
47 512 23. Borschmann KN, Hayward KS. Recovery of upper limb function is greatest early after  
48  
49 513 stroke but does continue to improve during the chronic phase: a two-year,  
50  
51 514 observational study. *Physiotherapy* 2020;107:216-223.  
52  
53  
54 515 doi:10.1016/j.physio.2019.10.001 Epub 2019 Oct 17.  
55  
56  
57 516 pmid:http://www.ncbi.nlm.nih.gov/pubmed/32026823  
58  
59  
60

- 1  
2  
3 517 24. Gaspar R, Padula N, Freitas TB, *et al.* Physical Exercise for Individuals With Spinal  
4  
5  
6 518 Cord Injury: Systematic Review Based on the International Classification of  
7  
8 519 Functioning, Disability, and Health. *J Sport Rehabil* 2019;28(5):505-516.  
9  
10 520 doi:10.1123/jsr.2017-0185. Epub 2019 Feb 19  
11  
12  
13 521 pmid:http://www.ncbi.nlm.nih.gov/pubmed/30300056  
14  
15  
16 522 25. Mekki M, Delgado AD, Fry A, *et al.* Robotic Rehabilitation and Spinal Cord Injury: a  
17  
18 523 Narrative Review. *Neurotherapeutics* 2018;15(3):604-617. doi:10.1007/s13311-018-  
19  
20 524 0642-3 pmid:http://www.ncbi.nlm.nih.gov/pubmed/29987763  
21  
22  
23  
24 525 26. Jackman M, Lannin N, Galea C, *et al.* What is the threshold dose of upper limb  
25  
26 526 training for children with cerebral palsy to improve function? A systematic review.  
27  
28 527 *Aust Occup Ther J* 2020;67(3):269-280. doi:10.1111/1440-1630.12666 Epub 2020 Apr  
29  
30 528 27. pmid:http://www.ncbi.nlm.nih.gov/pubmed/32342517  
31  
32  
33  
34 529 27. Bernhardt J, Hayward KS, Kwakkel G, *et al.* Agreed Definitions and a Shared Vision for  
35  
36 530 New Standards in Stroke Recovery Research: The Stroke Recovery and Rehabilitation  
37  
38 531 Roundtable Taskforce. *Neurorehabil Neural Repair* 2017 Sep;31(9):793-799  
39  
40 532 doi:10.1177/1545968317732668  
41  
42  
43 533 pmid:http://www.ncbi.nlm.nih.gov/pubmed/28934920  
44  
45  
46  
47 534 28. International Organization for Standardization (2019b). Medical electrical equipment  
48  
49 535 — Part 2-78: particular requirements for basic safety and essential performance of  
50  
51 536 medical robots for rehabilitation, assessment, compensation or alleviation. IEC  
52  
53  
54 537 80601-2-78:2019. Available at: <https://www.iso.org/standard/68474.html>.  
55  
56  
57  
58  
59  
60

- 1  
2  
3 538 29. Bessler J, Prange-Lasonder GB, Schaake L, *et al.* Safety Assessment of Rehabilitation  
4  
5  
6 539 Robots: A Review Identifying Safety Skills and Current Knowledge Gaps. *Front Robot*  
7  
8 540 *AI* 2021;8:602878. doi:10.3389/frobt.2021.602878  
9  
10  
11 541 pmid:http://www.ncbi.nlm.nih.gov/pubmed/33937345  
12  
13  
14 542 30. Lockwood C, Porrit K, Munn Z, *et al.* Chapter 2: Systematic reviews of qualitative  
15  
16 543 evidence. Joanna Briggs Institute, Joanna Briggs Institute Reviewer's Manual  
17  
18 544 [Internet]. Adelaide: 2017.  
19  
20  
21 545 31. Lefebvre C, Glanville J, Briscoe S, *et al.* Chapter 4: Searching for and selecting studies.  
22  
23 546 Cochrane Handbook for Systematic Reviews of Interventions version 6.3 [Internet].  
24  
25 547 Cochrane: 2022.  
26  
27  
28 548 32. Munn Z, Aromataris E, Tufanaru C, *et al.* The development of software to support  
29  
30 549 multiple systematic review types: the Joanna Briggs Institute System for the Unified  
31  
32 550 Management, Assessment and Review of Information (JBI SUMARI). *Int J Evid Based*  
33  
34 551 *Healthc* 2019;17(1):36-43. doi:10.1097/XEB.0000000000000152  
35  
36 552 pmid:http://www.ncbi.nlm.nih.gov/pubmed/30239357  
37  
38  
39 553 33. Page MJ, McKenzie JE, Bossuyt PM, *et al.* The PRISMA 2020 statement: An updated  
40  
41 554 guideline for reporting systematic reviews. *J Clin Epidemiol* 2021;134:178-189.  
42  
43 555 pmid:http://www.ncbi.nlm.nih.gov/pubmed/33789819  
44  
45  
46  
47 556 34. Joanna Briggs Institute. Checklist for Qualitative Research [Internet]. Adelaide:  
48  
49 557 Joanna Briggs Institute; 2017 [cited 2021 Nov 26]. Available from:  
50  
51 558 [https://joannabriggs.org/sites/default/files/2019-05/JBI\\_Critical\\_Appraisal-](https://joannabriggs.org/sites/default/files/2019-05/JBI_Critical_Appraisal-Checklist_for_Qualitative_Research2017_0.pdf)  
52  
53 559 [Checklist\\_for\\_Qualitative\\_Research2017\\_0.pdf](https://joannabriggs.org/sites/default/files/2019-05/JBI_Critical_Appraisal-Checklist_for_Qualitative_Research2017_0.pdf)  
54  
55  
56  
57  
58  
59  
60

- 1  
2  
3 560 35. Lockwood C, Munn Z, Porritt K. Qualitative research synthesis: methodological  
4  
5  
6 561 guidance for systematic reviewers utilizing meta-aggregation. *Int J Evid Based*  
7  
8 562 *Healthc* 2015;13(3):179-87 pmid:<http://www.ncbi.nlm.nih.gov/pubmed/26262565>  
9  
10 563 36. Munn Z, Porritt K, Lockwood C, et al. Establishing confidence in the output of  
11  
12  
13 564 qualitative research synthesis: the ConQual approach. *BMC Med Res Methodol*  
14  
15 565 2014;14:108. pmid:<http://www.ncbi.nlm.nih.gov/pubmed/25927294>  
16  
17  
18 566 37. Flemming K, Noyes J. Qualitative Evidence Synthesis: Where Are We at? *Int J Qual*  
19  
20 567 *Methods* 2021;20:10.1177/1609406921993276. doi:10.1177/1609406921993276  
21  
22  
23  
24  
25  
26  
27  
28  
29  
30  
31  
32  
33  
34  
35  
36  
37  
38  
39  
40  
41  
42  
43  
44  
45  
46  
47  
48  
49  
50  
51  
52  
53  
54  
55  
56  
57  
58  
59  
60



Figure 1 illustrates an example of upper limb training using an end-effector robot, H-man. \*Note: The person shown in the picture is not a patient and was taken with the participant's knowledge and permission. Picture courtesy of Articares.

724x254mm (300 x 300 DPI)

1  
2  
3  
4  
5  
6  
7  
8  
9  
10  
11  
12  
13  
14  
15  
16  
17  
18  
19  
20  
21  
22  
23  
24  
25  
26  
27  
28  
29  
30  
31  
32  
33  
34  
35  
36  
37  
38  
39  
40  
41  
42  
43  
44  
45  
46  
47  
48  
49  
50  
51  
52  
53  
54  
55  
56  
57  
58  
59  
60



Figure 2 illustrates an example of upper limb training using an end-effector robot, MO.TO.RE. \*Note: The person shown in the picture is not a patient and was taken with the participant's knowledge and permission. Picture courtesy of Humanware S.r.l.

721x265mm (300 x 300 DPI)





Figure 3 illustrates an example of upper limb training using an exoskeleton robot, ArmeoPower. \*Note: The person shown in the picture is not a patient and was taken with the participant's knowledge and permission. Picture courtesy of Hocoma.

718x239mm (300 x 300 DPI)

1  
2  
3  
4  
5  
6  
7  
8  
9  
10  
11  
12  
13  
14  
15  
16  
17  
18  
19  
20  
21  
22  
23  
24  
25  
26  
27  
28  
29  
30  
31  
32  
33  
34  
35  
36  
37  
38  
39  
40  
41  
42  
43  
44  
45  
46  
47  
48  
49  
50  
51  
52  
53  
54  
55  
56  
57  
58  
59  
60



Figure 4 illustrates an example of an upper limb exosuit robot described by Hoang et al. being worn by a volunteer. \*Note: The person shown in the picture is not a patient and was taken with the participant's knowledge and permission. Picture courtesy of Dr Thanh Nho Do.

618x314mm (300 x 300 DPI)

Ovid MEDLINE(R) ALL <1946 to May 20, 2022>

1 exp Psychiatrists/ or exp Health Personnel/ or exp Allied Health Personnel/ or exp Physicians/  
 2 or exp Primary Health Care/ or exp Nurses/ or exp Family Nurse Practitioners/ or exp Nurse  
 3 Practitioners/ or exp Physical Therapists/ or exp Occupational Therapists/ or health personnel.mp. or  
 4 healthcare professional\*.mp. or health-care professional\*.mp. or health care professional\*.mp. or  
 5 allied health professional\*.mp. or doctor\*.mp. or physician\*.mp. or geriatric\*.mp. or rescriber\*.mp.  
 6 or primary healthcare.mp. or paramedic\*.mp. or family nurse.mp. or nurse.mp. or community  
 7 nurse.mp. or physio\*.mp. or physiotherapist.mp. or physio therapist.mp. or physical therapist.mp. or  
 8 hand therapist.mp. or self treatment.mp. or (Caregiver support regime therapy or Carer).mp. or  
 9 Caregivers/ or (health care professional or health care professionals or health care provider or health  
 10 care providers or healthcare provider or healthcare providers or healthcare worker or healthcare  
 11 workers or personnel, health or professional, health care or provider, health care or provider,  
 12 healthcare).mp. (Records Retrieved – 7196481)

2 exp "Attitude of Health Personnel"/ or exp Attitude/ or exp Occupational Stress/ or exp  
 3 "Delivery of Health Care"/ or exp Qualitative Research/ or experience\*.mp. or feel\*.mp. or  
 4 encounter\*.mp. or perception\*.mp. or opinion\*.mp. (Records Retrieved – 3027183)

5 1 and 2 (Records Retrieved – 1094496)

6 exp "Quality of Health Care"/ or exp Patient Satisfaction/ or exp Patient Compliance/ or exp  
 7 Compliance/ or exp "Patient Acceptance of Health Care"/ or exp "Treatment Adherence and  
 8 Compliance"/ or exp Patient Dropouts/ or exp Treatment Refusal/ or exp Patient Participation/ or  
 9 exp Psychological Distress/ or exp Health Behavior/ or exp "Quality of Life"/ or exp Attitude/ or exp  
 10 Qualitative Research/ or patient satisfaction.mp. or patient acceptance.mp. or patient dropout\*.mp.  
 11 or patient participation.mp. or treatment refus\*.mp. or experience\*.mp. or feel\*.mp. or  
 12 encounter\*.mp. or perception\*.mp. or opinion\*.mp. (Records Retrieved – 9171170)

13 3 or 4 (Records Retrieved – 9292409)

14 exp cerebrovascular disorders/ or exp basal ganglia cerebrovascular disease/ or exp brain  
 15 ischemia/ or exp carotid artery diseases/ or exp cerebral small vessel diseases/ or exp intracranial  
 16 arterial diseases/ or exp "intracranial embolism and thrombosis"/ or exp intracranial hemorrhages/  
 17 or stroke/ or exp brain infarction/ or stroke, lacunar/ or vasospasm, intracranial/ or vertebral artery  
 18 dissection/ or brain injuries/ or brain injury, chronic/ or (stroke\* or poststroke or apoplex\* or  
 19 cerebral vasc\* or brain vasc\* or cerebrovasc\* or cva\* or SAH).mp. or ((brain or cerebr\* or cerebell\*  
 20 or vertebrobasil\* or hemispher\* or intracran\* or intracerebral or infratentorial or supratentorial or  
 21 middle cerebral artery or MCA\* or anterior circulation or posterior circulation or basilar artery or  
 22 vertebral artery or space-occupying) adj5 (isch?emi\* or infarct\* or thrombo\* or emboli\* or occlus\*  
 23 or hypoxi\*).mp. or ((brain\* or cerebr\* or cerebell\* or intracerebral or intracran\* or parenchymal or  
 24 intraparenchymal or intraventricular or infratentorial or supratentorial or basal gangli\* or putaminal  
 25 or putamen or posterior fossa or hemispher\* or subarachnoid) adj5 (h?emorrhag\* or h?ematoma\*  
 26 or bleed\*).mp. or hemiplegia/ or exp paresis/ or (hemipleg\* or hemipar\* or paresis or paretic or  
 27 brain injur\*).mp. (Records Retrieved – 805510)

28 exp upper extremity/ or (upper limb\* or upper extremit\* or arm or arms or shoulder or  
 29 shoulders or hand or hands or axilla\* or elbow\* or forearm\* or finger\* or wrist\*).mp. (Records  
 30 Retrieved – 1087124)

1  
2  
3 8 robotics/ or automation/ or orthotic devices/ or "equipment and supplies"/ or self-help  
4 devices/ or therapy, computer-assisted/ or man-machine systems/ or (robot\* or orthos\* or orthotic  
5 or automat\* or computer aided or computer assisted or device\*).mp. or (electromechanical or  
6 electro-mechanical or mechanical or mechanised or mechanized or driven).mp. or exercise  
7 movement techniques/ or exercise/ or exercise therapy/ or muscle stretching techniques/ or motion  
8 therapy, continuous passive/ or ((continuous passive or cpm) adj3 therap\*).mp. or (assist\* adj5  
9 (train\* or aid\* or rehabilitat\* or re-educat\*).mp. (Records Retrieved – 2054580)  
10  
11

12 9 5 and 6 and 7 and 8 (Records Retrieved – 4059)  
13  
14  
15  
16  
17  
18  
19  
20  
21  
22  
23  
24  
25  
26  
27  
28  
29  
30  
31  
32  
33  
34  
35  
36  
37  
38  
39  
40  
41  
42  
43  
44  
45  
46  
47  
48  
49  
50  
51  
52  
53  
54  
55  
56  
57  
58  
59  
60

For peer review only

**S1 Table:** Preferred reporting items for systematic review and meta-analysis protocols (PRISMA-P) 2015 statement. Systematic Reviews 2015 4:1

| Section/topic                     | #  | Checklist item                                                                                                                                                                                  | Information reported                |                                     | Line number(s)       |
|-----------------------------------|----|-------------------------------------------------------------------------------------------------------------------------------------------------------------------------------------------------|-------------------------------------|-------------------------------------|----------------------|
|                                   |    |                                                                                                                                                                                                 | Yes                                 | No                                  |                      |
| <b>ADMINISTRATIVE INFORMATION</b> |    |                                                                                                                                                                                                 |                                     |                                     |                      |
| <b>Title</b>                      |    |                                                                                                                                                                                                 |                                     |                                     |                      |
| Identification                    | 1a | Identify the report as a protocol of a systematic review                                                                                                                                        | <input checked="" type="checkbox"/> | <input type="checkbox"/>            | 4, 50                |
| Update                            | 1b | If the protocol is for an update of a previous systematic review, identify as such                                                                                                              | <input type="checkbox"/>            | <input checked="" type="checkbox"/> | N/A.                 |
| <b>Registration</b>               | 2  | If registered, provide the name of the registry (e.g., PROSPERO) and registration number in the Abstract                                                                                        | <input checked="" type="checkbox"/> | <input type="checkbox"/>            | 79, 268-269, 413-419 |
| <b>Authors</b>                    |    |                                                                                                                                                                                                 |                                     |                                     |                      |
| Contact                           | 3a | Provide name, institutional affiliation, and e-mail address of all protocol authors; provide physical mailing address of corresponding author                                                   | <input checked="" type="checkbox"/> | <input type="checkbox"/>            | 5-42                 |
| Contributions                     | 3b | Describe contributions of protocol authors and identify the guarantor of the review                                                                                                             | <input checked="" type="checkbox"/> | <input type="checkbox"/>            | 400-406              |
| <b>Amendments</b>                 | 4  | If the protocol represents an amendment of a previously completed or published protocol, identify as such and list changes; otherwise, state plan for documenting important protocol amendments | <input type="checkbox"/>            | <input checked="" type="checkbox"/> | N/A                  |
| <b>Support</b>                    |    |                                                                                                                                                                                                 |                                     |                                     |                      |
| Sources                           | 5a | Indicate sources of financial or other support for the review                                                                                                                                   | <input checked="" type="checkbox"/> | <input type="checkbox"/>            | 407=409              |
| Sponsor                           | 5b | Provide name for the review funder and/or sponsor                                                                                                                                               | <input checked="" type="checkbox"/> | <input type="checkbox"/>            | 407=409              |
| Role of sponsor/funder            | 5c | Describe roles of funder(s), sponsor(s), and/or institution(s), if any, in developing the protocol                                                                                              | <input checked="" type="checkbox"/> | <input type="checkbox"/>            | 407=409              |
| <b>INTRODUCTION</b>               |    |                                                                                                                                                                                                 |                                     |                                     |                      |
| <b>Rationale</b>                  | 6  | Describe the rationale for the review in the context of what is already known                                                                                                                   | <input checked="" type="checkbox"/> | <input type="checkbox"/>            | 111-171              |

| Section/topic                      | #   | Checklist item                                                                                                                                                                                                            | Information reported                |                                     | Line number(s)         |
|------------------------------------|-----|---------------------------------------------------------------------------------------------------------------------------------------------------------------------------------------------------------------------------|-------------------------------------|-------------------------------------|------------------------|
|                                    |     |                                                                                                                                                                                                                           | Yes                                 | No                                  |                        |
| <b>Objectives</b>                  | 7   | Provide an explicit statement of the question(s) the review will address with reference to participants, interventions, comparators, and outcomes (PICO)                                                                  | <input checked="" type="checkbox"/> | <input type="checkbox"/>            | 173 -177               |
| <b>METHODS</b>                     |     |                                                                                                                                                                                                                           |                                     |                                     |                        |
| <b>Eligibility criteria</b>        | 8   | Specify the study characteristics (e.g., PICO, study design, setting, time frame) and report characteristics (e.g., years considered, language, publication status) to be used as criteria for eligibility for the review | <input checked="" type="checkbox"/> | <input type="checkbox"/>            | 184- 264               |
| <b>Information sources</b>         | 9   | Describe all intended information sources (e.g., electronic databases, contact with study authors, trial registers, or other grey literature sources) with planned dates of coverage                                      | <input checked="" type="checkbox"/> | <input type="checkbox"/>            | 279-285                |
| <b>Search strategy</b>             | 10  | Present draft of search strategy to be used for at least one electronic database, including planned limits, such that it could be repeated                                                                                | <input checked="" type="checkbox"/> | <input type="checkbox"/>            | 270-285 and Appendix 1 |
| <b>STUDY RECORDS</b>               |     |                                                                                                                                                                                                                           |                                     |                                     |                        |
| <b>Data management</b>             | 11a | Describe the mechanism(s) that will be used to manage records and data throughout the review                                                                                                                              | <input checked="" type="checkbox"/> | <input type="checkbox"/>            | 286-366                |
| <b>Selection process</b>           | 11b | State the process that will be used for selecting studies (e.g., two independent reviewers) through each phase of the review (i.e., screening, eligibility, and inclusion in meta-analysis)                               | <input checked="" type="checkbox"/> | <input type="checkbox"/>            | 286-301                |
| <b>Data collection process</b>     | 11c | Describe planned method of extracting data from reports (e.g., piloting forms, done independently, in duplicate), any processes for obtaining and confirming data from investigators                                      | <input checked="" type="checkbox"/> | <input type="checkbox"/>            | 311-323                |
| <b>Data items</b>                  | 12  | List and define all variables for which data will be sought (e.g., PICO items, funding sources), any pre-planned data assumptions and simplifications                                                                     | <input type="checkbox"/>            | <input checked="" type="checkbox"/> | 311-323                |
| <b>Outcomes and prioritization</b> | 13  | List and define all outcomes for which data will be sought, including                                                                                                                                                     | <input type="checkbox"/>            | <input checked="" type="checkbox"/> | N/A                    |

| Section/topic                             | #   | Checklist item                                                                                                                                                                                                                              | Information reported                |                                     | Line number(s) |
|-------------------------------------------|-----|---------------------------------------------------------------------------------------------------------------------------------------------------------------------------------------------------------------------------------------------|-------------------------------------|-------------------------------------|----------------|
|                                           |     |                                                                                                                                                                                                                                             | Yes                                 | No                                  |                |
|                                           |     | prioritization of main and additional outcomes, with rationale                                                                                                                                                                              |                                     |                                     |                |
| <b>Risk of bias in individual studies</b> | 14  | Describe anticipated methods for assessing risk of bias of individual studies, including whether this will be done at the outcome or study level, or both; state how this information will be used in data synthesis                        | <input checked="" type="checkbox"/> | <input type="checkbox"/>            | 302-310        |
| <b>DATA</b>                               |     |                                                                                                                                                                                                                                             |                                     |                                     |                |
| <b>Synthesis</b>                          | 15a | Describe criteria under which study data will be quantitatively synthesized                                                                                                                                                                 | <input type="checkbox"/>            | <input checked="" type="checkbox"/> | N/A            |
|                                           | 15b | If data are appropriate for quantitative synthesis, describe planned summary measures, methods of handling data, and methods of combining data from studies, including any planned exploration of consistency (e.g., $I^2$ , Kendall's tau) | <input type="checkbox"/>            | <input checked="" type="checkbox"/> | N/A            |
|                                           | 15c | Describe any proposed additional analyses (e.g., sensitivity or subgroup analyses, meta-regression)                                                                                                                                         | <input type="checkbox"/>            | <input checked="" type="checkbox"/> | N/A            |
|                                           | 15d | If quantitative synthesis is not appropriate, describe the type of summary planned                                                                                                                                                          | <input checked="" type="checkbox"/> | <input type="checkbox"/>            | 324-331        |
| <b>Meta-bias(es)</b>                      | 16  | Specify any planned assessment of meta-bias(es) (e.g., publication bias across studies, selective reporting within studies)                                                                                                                 | <input type="checkbox"/>            | <input checked="" type="checkbox"/> | N/A            |
| <b>Confidence in cumulative evidence</b>  | 17  | Describe how the strength of the body of evidence will be assessed (e.g., GRADE)                                                                                                                                                            | <input checked="" type="checkbox"/> | <input type="checkbox"/>            | 332-340        |

**S1 Table:** Preferred reporting items for systematic review and meta-analysis protocols (PRISMA-P) 2015 statement. Systematic Reviews 2015 4:1

| Section/topic                     | #  | Checklist item                                                                                                                                                                                  | Information reported                |                                     | Line number(s)                                 |
|-----------------------------------|----|-------------------------------------------------------------------------------------------------------------------------------------------------------------------------------------------------|-------------------------------------|-------------------------------------|------------------------------------------------|
|                                   |    |                                                                                                                                                                                                 | Yes                                 | No                                  |                                                |
| <b>ADMINISTRATIVE INFORMATION</b> |    |                                                                                                                                                                                                 |                                     |                                     |                                                |
| <b>Title</b>                      |    |                                                                                                                                                                                                 |                                     |                                     |                                                |
| Identification                    | 1a | Identify the report as a protocol of a systematic review                                                                                                                                        | <input checked="" type="checkbox"/> | <input type="checkbox"/>            | 4, 50                                          |
| Update                            | 1b | If the protocol is for an update of a previous systematic review, identify as such                                                                                                              | <input type="checkbox"/>            | <input checked="" type="checkbox"/> | N/A.                                           |
| <b>Registration</b>               | 2  | If registered, provide the name of the registry (e.g., PROSPERO) and registration number in the Abstract                                                                                        | <input checked="" type="checkbox"/> | <input type="checkbox"/>            | 79, 26 <del>89</del> -<br>26970,<br>4134-41920 |
| <b>Authors</b>                    |    |                                                                                                                                                                                                 |                                     |                                     |                                                |
| Contact                           | 3a | Provide name, institutional affiliation, and e-mail address of all protocol authors; provide physical mailing address of corresponding author                                                   | <input checked="" type="checkbox"/> | <input type="checkbox"/>            | 5-42                                           |
| Contributions                     | 3b | Describe contributions of protocol authors and identify the guarantor of the review                                                                                                             | <input checked="" type="checkbox"/> | <input type="checkbox"/>            | 4001-4067                                      |
| <b>Amendments</b>                 | 4  | If the protocol represents an amendment of a previously completed or published protocol, identify as such and list changes; otherwise, state plan for documenting important protocol amendments | <input type="checkbox"/>            | <input checked="" type="checkbox"/> | N/A                                            |
| <b>Support</b>                    |    |                                                                                                                                                                                                 |                                     |                                     |                                                |
| Sources                           | 5a | Indicate sources of financial or other support for the review                                                                                                                                   | <input checked="" type="checkbox"/> | <input type="checkbox"/>            | 408-410<br>407=409                             |
| Sponsor                           | 5b | Provide name for the review funder and/or sponsor                                                                                                                                               | <input checked="" type="checkbox"/> | <input type="checkbox"/>            | 407=409<br>408-410                             |
| Role of sponsor/funder            | 5c | Describe roles of funder(s), sponsor(s), and/or institution(s), if any, in developing the protocol                                                                                              | <input checked="" type="checkbox"/> | <input type="checkbox"/>            | 407=409<br>408-410                             |
| <b>INTRODUCTION</b>               |    |                                                                                                                                                                                                 |                                     |                                     |                                                |
| <b>Rationale</b>                  | 6  | Describe the rationale for the review in the context of what is already known                                                                                                                   | <input checked="" type="checkbox"/> | <input type="checkbox"/>            | 111-1712                                       |



| Section/topic                      | #   | Checklist item                                                                                                                                                                                                            | Information reported                |                                     | Line number(s)                                    |
|------------------------------------|-----|---------------------------------------------------------------------------------------------------------------------------------------------------------------------------------------------------------------------------|-------------------------------------|-------------------------------------|---------------------------------------------------|
|                                    |     |                                                                                                                                                                                                                           | Yes                                 | No                                  |                                                   |
| <b>Objectives</b>                  | 7   | Provide an explicit statement of the question(s) the review will address with reference to participants, interventions, comparators, and outcomes (PICO)                                                                  | <input checked="" type="checkbox"/> | <input type="checkbox"/>            | 17 <del>34</del> -17 <del>78</del>                |
| <b>METHODS</b>                     |     |                                                                                                                                                                                                                           |                                     |                                     |                                                   |
| <b>Eligibility criteria</b>        | 8   | Specify the study characteristics (e.g., PICO, study design, setting, time frame) and report characteristics (e.g., years considered, language, publication status) to be used as criteria for eligibility for the review | <input checked="" type="checkbox"/> | <input type="checkbox"/>            | 18 <del>45</del> - 26 <del>45</del>               |
| <b>Information sources</b>         | 9   | Describe all intended information sources (e.g., electronic databases, contact with study authors, trial registers, or other grey literature sources) with planned dates of coverage                                      | <input checked="" type="checkbox"/> | <input type="checkbox"/>            | 27 <del>980</del> -28 <del>56</del>               |
| <b>Search strategy</b>             | 10  | Present draft of search strategy to be used for at least one electronic database, including planned limits, such that it could be repeated                                                                                | <input checked="" type="checkbox"/> | <input type="checkbox"/>            | 27 <del>01</del> -28 <del>56</del> and Appendix 1 |
| <b>STUDY RECORDS</b>               |     |                                                                                                                                                                                                                           |                                     |                                     |                                                   |
| Data management                    | 11a | Describe the mechanism(s) that will be used to manage records and data throughout the review                                                                                                                              | <input checked="" type="checkbox"/> | <input type="checkbox"/>            | 28 <del>67</del> -36 <del>67</del>                |
| Selection process                  | 11b | State the process that will be used for selecting studies (e.g., two independent reviewers) through each phase of the review (i.e., screening, eligibility, and inclusion in meta-analysis)                               | <input checked="" type="checkbox"/> | <input type="checkbox"/>            | 28 <del>67</del> -30 <del>12</del>                |
| Data collection process            | 11c | Describe planned method of extracting data from reports (e.g., piloting forms, done independently, in duplicate), any processes for obtaining and confirming data from investigators                                      | <input checked="" type="checkbox"/> | <input type="checkbox"/>            | 31 <del>12</del> -32 <del>34</del>                |
| <b>Data items</b>                  | 12  | List and define all variables for which data will be sought (e.g., PICO items, funding sources), any pre-planned data assumptions and simplifications                                                                     | <input type="checkbox"/>            | <input checked="" type="checkbox"/> | 31 <del>12</del> -32 <del>34</del>                |
| <b>Outcomes and prioritization</b> | 13  | List and define all outcomes for which data will be sought, including                                                                                                                                                     | <input type="checkbox"/>            | <input checked="" type="checkbox"/> | N/A                                               |

| Section/topic                             | #   | Checklist item                                                                                                                                                                                                                              | Information reported                |                                     | Line number(s)                     |
|-------------------------------------------|-----|---------------------------------------------------------------------------------------------------------------------------------------------------------------------------------------------------------------------------------------------|-------------------------------------|-------------------------------------|------------------------------------|
|                                           |     |                                                                                                                                                                                                                                             | Yes                                 | No                                  |                                    |
|                                           |     | prioritization of main and additional outcomes, with rationale                                                                                                                                                                              |                                     |                                     |                                    |
| <b>Risk of bias in individual studies</b> | 14  | Describe anticipated methods for assessing risk of bias of individual studies, including whether this will be done at the outcome or study level, or both; state how this information will be used in data synthesis                        | <input checked="" type="checkbox"/> | <input type="checkbox"/>            | 30 <del>23</del> -31 <del>01</del> |
| <b>DATA</b>                               |     |                                                                                                                                                                                                                                             |                                     |                                     |                                    |
| <b>Synthesis</b>                          | 15a | Describe criteria under which study data will be quantitatively synthesized                                                                                                                                                                 | <input type="checkbox"/>            | <input checked="" type="checkbox"/> | N/A                                |
|                                           | 15b | If data are appropriate for quantitative synthesis, describe planned summary measures, methods of handling data, and methods of combining data from studies, including any planned exploration of consistency (e.g., $I^2$ , Kendall's tau) | <input type="checkbox"/>            | <input checked="" type="checkbox"/> | N/A                                |
|                                           | 15c | Describe any proposed additional analyses (e.g., sensitivity or subgroup analyses, meta-regression)                                                                                                                                         | <input type="checkbox"/>            | <input checked="" type="checkbox"/> | N/A                                |
|                                           | 15d | If quantitative synthesis is not appropriate, describe the type of summary planned                                                                                                                                                          | <input checked="" type="checkbox"/> | <input type="checkbox"/>            | 32 <del>45</del> -33 <del>12</del> |
| <b>Meta-bias(es)</b>                      | 16  | Specify any planned assessment of meta-bias(es) (e.g., publication bias across studies, selective reporting within studies)                                                                                                                 | <input type="checkbox"/>            | <input checked="" type="checkbox"/> | N/A                                |
| <b>Confidence in cumulative evidence</b>  | 17  | Describe how the strength of the body of evidence will be assessed (e.g., GRADE)                                                                                                                                                            | <input checked="" type="checkbox"/> | <input type="checkbox"/>            | 33 <del>23</del> -34 <del>01</del> |
