# Supplementary material for: Experiences of patients who had a stroke and rehabilitation professionals with upper limb rehabilitation robots: a qualitative systematic review protocol
Source: PubMed Central journal article supplement — BMJ Open. 2022 Sep 19;12(9):e065177. doi: 10.1136/bmjopen-2022-065177 (PMC9486398; doi:10.1136/bmjopen-2022-065177), 2022-09-19
Supplement: bmjopen-2022-065177supp001.pdf [file bmjopen-2022-065177supp001.pdf]

Ovid MEDLINE(R) ALL <1946 to May 20, 2022>

1 exp Psychiatrists/ or exp Health Personnel/ or exp Allied Health Personnel/ or exp Physicians/ or exp Primary Health Care/ or exp Nurses/ or exp Family Nurse Practitioners/ or exp Nurse Practitioners/ or exp Physical Therapists/ or exp Occupational Therapists/ or health personnel.mp. or healthcare professional\*.mp. or health-care professional\*.mp. or health care professional\*.mp. or allied health professional\*.mp. or doctor\*.mp. or physician\*.mp. or geriatric\*.mp. or rescriber\*.mp. or primary healthcare.mp. or paramedic\*.mp. or family nurse.mp. or nurse.mp. or community nurse.mp. or physio\*.mp. or physiotherapist.mp. or physio therapist.mp. or physical therapist.mp. or hand therapist.mp. or self treatment.mp. or (Caregiver support regime therapy or Carer).mp. or Caregivers/ or (health care professional or health care professionals or health care provider or health care providers or healthcare provider or healthcare providers or healthcare worker or healthcare workers or personnel, health or professional, health care or provider, health care or provider, healthcare).mp. (Records Retrieved – 7196481)

2 exp "Attitude of Health Personnel"/ or exp Attitude/ or exp Occupational Stress/ or exp "Delivery of Health Care"/ or exp Qualitative Research/ or experience\*.mp. or feel\*.mp. or encounter\*.mp. or perception\*.mp. or opinion\*.mp. (Records Retrieved – 3027183)

3 1 and 2 (Records Retrieved – 1094496)

4 exp "Quality of Health Care"/ or exp Patient Satisfaction/ or exp Patient Compliance/ or exp Compliance/ or exp "Patient Acceptance of Health Care"/ or exp "Treatment Adherence and Compliance"/ or exp Patient Dropouts/ or exp Treatment Refusal/ or exp Patient Participation/ or exp Psychological Distress/ or exp Health Behavior/ or exp "Quality of Life"/ or exp Attitude/ or exp Qualitative Research/ or patient satisfaction.mp. or patient acceptance.mp. or patient dropout\*.mp. or patient participation.mp. or treatment refus\*.mp. or experience\*.mp. or feel\*.mp. or encounter\*.mp. or perception\*.mp. or opinion\*.mp. (Records Retrieved – 9171170)

5 3 or 4 (Records Retrieved – 9292409)

6 exp cerebrovascular disorders/ or exp basal ganglia cerebrovascular disease/ or exp brain ischemia/ or exp carotid artery diseases/ or exp cerebral small vessel diseases/ or exp intracranial arterial diseases/ or exp "intracranial embolism and thrombosis"/ or exp intracranial hemorrhages/ or stroke/ or exp brain infarction/ or stroke, lacunar/ or vasospasm, intracranial/ or vertebral artery dissection/ or brain injuries/ or brain injury, chronic/ or (stroke\* or poststroke or apoplex\* or cerebral vasc\* or brain vasc\* or cerebrovasc\* or cva\* or SAH).mp. or ((brain or cerebr\* or cerebell\* or vertebrobasil\* or hemispher\* or intracran\* or intracerebral or infratentorial or supratentorial or middle cerebral artery or MCA\* or anterior circulation or posterior circulation or basilar artery or vertebral artery or space-occupying) adj5 (isch?emi\* or infarct\* or thrombo\* or emboli\* or occlus\* or hypoxi\*)).mp. or ((brain\* or cerebr\* or cerebell\* or intracerebral or intracran\* or parenchymal or intraparenchymal or intraventricular or infratentorial or supratentorial or basal gangli\* or putaminal or putamen or posterior fossa or hemispher\* or subarachnoid) adj5 (h?emorrhag\* or h?ematoma\* or bleed\*)).mp. or hemiplegia/ or exp paresis/ or (hemipleg\* or hemipar\* or paresis or paretic or brain injur\*).mp. (Records Retrieved – 805510)

7 exp upper extremity/ or (upper limb\* or upper extremit\* or arm or arms or shoulder or shoulders or hand or hands or axilla\* or elbow\* or forearm\* or finger\* or wrist\*).mp. (Records Retrieved – 1087124)

8 robotics/ or automation/ or orthotic devices/ or "equipment and supplies"/ or self-help devices/ or therapy, computer-assisted/ or man-machine systems/ or (robot\* or orthos\* or orthotic or automat\* or computer aided or computer assisted or device\*).mp. or (electromechanical or electro-mechanical or mechanical or mechanised or mechanized or driven).mp. or exercise movement techniques/ or exercise/ or exercise therapy/ or muscle stretching techniques/ or motion therapy, continuous passive/ or ((continuous passive or cpm) adj3 therap\*).mp. or (assist\* adj5 (train\* or aid\* or rehabilitat\* or re-educat\*)).mp. (Records Retrieved – 2054580)

9 5 and 6 and 7 and 8 (Records Retrieved – 4059)
